1 **Title**

2 Blockade of stromal Gas6 alters cancer cell plasticity, activates NK cells and inhibits  
3 pancreatic cancer metastasis.

4 **Running title**

5 Gas6 blockade prevents pancreatic cancer metastasis  
6

7 **Key words**

8 Gas6, pancreatic cancer, metastasis, macrophages, fibroblasts, NK cells

9 **Authors**

10 Lucy Ireland <sup>1</sup>, Teifion Lockett <sup>1</sup>, Michael C. Schmid <sup>1</sup>, Ainhoa Mielgo <sup>1\*</sup>

11 **Affiliations**

12 <sup>1</sup> Department of Molecular and Clinical Cancer Medicine. University of Liverpool. Liverpool  
13 L69 3GE, UK.

14 **Correspondence**

15 \* author to whom correspondence should be addressed:

16 Dr Ainhoa Mielgo

17 Department of Molecular & Clinical Cancer Medicine, Institute of Translational Medicine

18 First Floor Sherrington Building, Ashton street, Liverpool L69 3GE

19 Phone: +44 (0) 151 794 9555

20 e-mail: [amielgo@liverpool.ac.uk](mailto:amielgo@liverpool.ac.uk)

21

22

## 23 **Abstract**

24 Pancreatic ductal adenocarcinoma (PDA) is one of the deadliest cancers due to its  
25 aggressive and metastatic nature. PDA is characterized by a rich tumor stroma with  
26 abundant macrophages, fibroblasts and collagen deposition that can represent up to 90% of  
27 the tumor mass. Activation of the tyrosine kinase receptor AXL and expression of its ligand  
28 growth arrest-specific protein 6 (Gas6) correlate with a poor prognosis and increased  
29 metastasis in pancreatic cancer patients. Gas6 is a multifunctional protein that can be  
30 secreted by several cell types and regulates multiple processes, including cancer cell  
31 plasticity, angiogenesis and immune cell functions. However, the role of Gas6 in pancreatic  
32 cancer metastasis has not been fully investigated. In these studies we find that, in pancreatic  
33 tumors, Gas6 is mainly produced by tumor associated macrophages (TAMs) and cancer  
34 associated fibroblasts (CAFs) and that pharmacological blockade of Gas6 partially reverses  
35 epithelial-to-mesenchymal transition (EMT) of tumor cells and supports NK cell activation,  
36 thereby inhibiting pancreatic cancer metastasis. Our data suggest that Gas6 simultaneously  
37 acts on both the tumor cells and the NK cells to support pancreatic cancer metastasis. This  
38 study supports the rationale for targeting Gas6 in pancreatic cancer and use NK cells as a  
39 potential biomarker for response to anti-Gas6 therapy.

40

41

42

43

44

45

46

47

48

## 49 **Introduction**

50 Growth arrest-specific gene 6 (Gas6) is a multifunctional factor that regulates several  
51 processes in normal physiology and pathophysiology [1]. Gas6 binds to the Tyro3,  
52 Axl and Mer (TAM) family of receptor tyrosine kinases (TAM receptors) with the  
53 highest affinity for Axl [2]. Gas6 supports erythropoiesis, platelet aggregation,  
54 angiogenesis, efferocytosis, and inhibits the immune response [3]. Gas6 is critical for  
55 the maintenance of immune homeostasis and mice deficient in Gas6 or TAM  
56 receptors experience severe autoimmune diseases [4]. Gas6 and its main receptor  
57 Axl are overexpressed in several cancer types including, breast, ovarian, gastric,  
58 glioblastoma, lung and pancreatic cancer and their expression correlates with a poor  
59 prognosis [5]. Axl is ubiquitously expressed in all tissues [6] but is particularly notable  
60 in cancer cells, macrophages, dendritic cells and natural killer cells for its role in  
61 driving immunosuppression and tumor progression [7-9]. Several cancer studies  
62 have focused on the role of Gas6-Axl signaling on the tumor cells and have  
63 demonstrated that Axl activation supports tumor cells proliferation, epithelial-  
64 mesenchymal transition (EMT), drug resistance, migration and metastasis [5].  
65 Factors secreted within the tumor microenvironment are able to sustain Gas6/Axl  
66 signaling. Hypoxia Inducible Factor (HIF) has been shown to bind to the Axl  
67 promoter region and upregulate its expression on renal cell carcinoma cells [10].  
68 Secretion of IL-10 and M-CSF by tumor cells induces tumor associated  
69 macrophages to secrete Gas6 [11].  
70 However, only a few studies have investigated the role of Gas6-Axl signaling in the  
71 immune response to breast cancer, ovarian cancer and melanoma [7, 9].

72 In solid tumors such as breast or pancreatic cancer, the tumor stroma can represent  
73 up to 80% of the tumor mass and actively influences cancer progression, metastasis  
74 [12-14] and resistance to therapies [15-17].

75 Pancreatic ductal adenocarcinoma (PDA) is one of the most lethal cancers  
76 worldwide and better therapies are urgently needed [18]. Metastasis, therapy  
77 resistance, and immunosuppression are key characteristics of pancreatic tumors [19,  
78 20]. The Gas6–Axl pathway is activated in 70% of pancreatic cancer patients [21]  
79 and is associated with a poor prognosis and increased frequency of distant  
80 metastasis [22]. Blocking Gas6 or its receptor Axl inhibits cancer progression [23, 24]  
81 and several Axl inhibitors are currently being tested in cancer patients, including  
82 PDA patients. While the cancer cell autonomous functions of Gas6 are well  
83 documented, the effect of Gas6 signaling in the stroma/immune compartment in  
84 pancreatic cancer has not been fully explored. In these studies, we sought to  
85 understand the effect of Gas6 blockade in both the tumor and the stroma/immune  
86 compartments, *in vivo*, in pancreatic cancer. Gaining a better understanding of how  
87 blockade of Gas6 signaling affects pancreatic cancer is important because it will help  
88 design and interpret the results of the recently launched clinical trials that are testing  
89 anti-Gas6/TAM receptors therapies in pancreatic cancer patients [25].

## 90 **Results**

### 91 **Pharmacological blockade of Gas6 inhibits spontaneous pancreatic cancer** 92 **metastasis.**

93 To investigate the effect of Gas6 blockade in pancreatic cancer growth and  
94 metastasis, we used an orthotopic syngeneic pancreatic cancer model, in which  
95 pancreatic cancer cells derived from the gold standard genetic mouse model of

96 pancreatic cancer (LSL-Kras<sup>G12D</sup>; LSL-Trp53<sup>R172H</sup>; Pdx1-Cre mice; KPC model),  
97 transduced with a reporter lentivirus expressing zsGreen/luciferase, were  
98 orthotopically implanted into the pancreas of syngeneic immuno-competent mice.  
99 This model faithfully recapitulates features of the human disease, and tumors are  
100 highly infiltrated by macrophages and are rich in fibroblasts [16, 26, 27]. Importantly,  
101 pancreatic tumors from this mouse model also showed expression and activation of  
102 Axl receptor (Supplementary Figure 1A). These mice were then treated with isotype  
103 control IgG antibody or an anti-Gas6 neutralizing antibody (Figure 1A). 30 days after  
104 implantation, pancreatic tumors, lungs, livers and mesenteric lymph nodes were  
105 surgically removed and analysed. As expected, control treated mice showed high  
106 levels of Axl receptor activation in tumors, whereas the anti-Gas6 treated group  
107 showed markedly reduced levels of Axl receptor activation, confirming that anti-Gas6  
108 antibody has reached the tumor and has blocked Axl signaling (Supplementary  
109 Figure 1A). No differences were seen in primary pancreatic tumor growth (Figure 1B)  
110 between the control and anti-Gas6 treatment groups. However, mice treated with the  
111 anti-Gas6 antibody showed reduced metastasis to lungs, livers and mesenteric  
112 lymph nodes, compared to control treated mice, as assessed by bioluminescence *ex-*  
113 *vivo* imaging of these organs (Supplementary Figure 1B,C and D). Since lungs  
114 showed the highest level of metastasis in this model, lung tissues were further  
115 assessed for metastasis by H&E. We observed that both the number of metastatic  
116 foci, as well as the size of the metastatic lesions were significantly reduced in control  
117 versus anti-Gas6 treated mice (Figure 1D and E). As a consequence the overall  
118 metastatic burden was very significantly reduced in the mice treated with anti-Gas6  
119 blocking antibody compared to control mice (Figure 1F). These data suggest that  
120 blockade of Gas6 affects the metastatic cascade at different stages, affecting the

121 metastatic spreading and/or initial seeding as well as the metastatic outgrowth of  
122 disseminated pancreatic cancer cells.

123

124 **Tumor associated macrophages and fibroblasts are the main sources of Gas6**  
125 **in pancreatic cancer.**

126 Gas6 is a multifunctional protein that is secreted by different cell types. Gas6 has  
127 been shown to be produced by macrophages in pre-malignant lesions of a mammary  
128 tumor model [28] and in xenograft and orthotopic models of colon and pancreatic  
129 cancer [29]. Gas6 can also be produced by tumor cells [30] and fibroblasts [31]. To  
130 determine which cell types produce Gas6 in pancreatic tumors, tumors were  
131 harvested at day 23, and tumor cells (CD45-/zsGreen+), non-immune stromal cells  
132 (CD45-/zsGreen-), M1-like macrophages (CD45+/F4/80+/CD206-) and M2-like  
133 macrophages (CD45+/F4/80+/CD206+) were isolated by flow cytometry (Figure 2A  
134 and supplementary Figure 2A, B) and analyzed for the expression of *gas6* (Figure  
135 2B). We found that both F4/80+/CD206+ (M2-like macrophages) and  $\alpha$ SMA+  
136 stromal cells (Supplementary Figure 2B) are the main sources of *gas6* in pancreatic  
137 tumors (Figure 2B). *Ex-vivo*, bone-marrow derived macrophages and pancreatic  
138 fibroblasts also produce Gas6 (Figure 2B, C). In agreement with these findings, we  
139 observed that tumor areas with activated Axl receptor were often surrounded by  
140 TAMs and CAFs (Figure 2C). Analysis of Axl expression and activation in pancreatic  
141 cancer patient samples has been correlated with a poor prognosis [21, 22] and Axl  
142 activation in cancer cells has been shown to support EMT, cell proliferation,  
143 metastasis and drug resistance [5]. While these studies have mainly focused on  
144 analyzing the expression and function of Axl on the cancer cells, Axl is also  
145 expressed in immune cells, endothelial cells and stromal cells and regulates innate

146 immunity [3, 4], angiogenesis [32-34] and fibrosis [31]. In agreement with this multi-  
147 functional role for Axl, we found that Axl is activated in both the tumor and the  
148 stromal/immune compartment in biopsies from pancreatic cancer patients (Figure  
149 3A, B).

150

151 **Gas6 blockade alters EMT of pancreatic cancer cells but does not affect**  
152 **angiogenesis or collagen deposition in pancreatic tumors.**

153 Previous studies have shown that Gas6-Axl signaling promotes tumor cells' EMT  
154 [35, 36]. To determine whether the reduced metastasis observed when we block  
155 Gas6 was caused by an effect on tumor cell EMT we evaluated the expression of  
156 EMT markers and transcription factors on tumor cells from pancreatic tumors treated  
157 with isotype control antibody or Gas6 blocking antibody. Tumor cells isolated from  
158 pancreatic tumors were analysed for the expression of the EMT transcription factors  
159 *Snail 1*, *Snail 2*, *Twist 1*, *Twist 2*, *Zeb 1* and *Zeb 2* (Figure 4A), the epithelial markers  
160 *E-cadherin*, *b-catenin* and *Epcam* and the mesenchymal markers *Vimentin* and *N-*  
161 *cadherin* (Figure 4B). We found that blocking of Gas6 significantly decreased the  
162 expression of the EMT transcription factors *Snail 1*, *Snail 2* and *Zeb 2* but did not  
163 alter the expression of *Twist 1*, *Zeb 1*, or *Twist 2* (the latter was hardly expressed in  
164 these pancreatic cancer cells) (Figure 4A). In agreement with this observation, Gas6  
165 blockade also decreased the expression of the mesenchymal marker *Vimentin*, while  
166 *N-cadherin* levels were very low and remained unchanged. However, *E-cadherin* and  
167 *B-catenin* levels were also decreased upon anti-Gas6 treatment, suggesting that  
168 Gas6 signaling partially regulates cancer cell plasticity [37, 38].

169 Pancreatic tumors are usually poorly vascularized but since Gas6 signaling can  
170 support endothelial cells proliferation and vascularization [33, 39, 40] we next  
171 evaluated whether anti-Gas6 therapy could affect angiogenesis in pancreatic tumors.  
172 Pancreatic tumor tissues from control and anti-Gas6 treated mice were stained with  
173 the endothelial marker CD31, whole tumor tissues were scanned and quantified for  
174 CD31 expression which remained unchanged in both treatment groups (Figure 4C,  
175 D). Gas6 can also regulate fibroblast proliferation and function. Fourcot et al.,  
176 showed, in a liver fibrosis model, that Gas6 is secreted by macrophages and  
177 fibroblasts and that Gas6 deficiency decreases TGF $\beta$  and collagen I production by  
178 hepatic fibroblasts [31].

179 Gas6 also stimulates the proliferation of cardiac fibroblasts [41]. Since fibrosis and  
180 collagen deposition have been suggested to re-strain the metastatic spreading of  
181 pancreatic cancer cells [42-45], we next investigated whether Gas6 blockade could  
182 affect collagen deposition in pancreatic tumors. Pancreatic tumor tissues from  
183 control and anti-Gas6 treated mice were stained with picosirius red to assess  
184 collagen deposition. Whole tumor tissues were scanned and quantified for collagen  
185 deposition (Sirius red positive areas). We observed a slight increase in collagen  
186 deposition in tumors from mice treated with anti-Gas6 antibody compared to control  
187 but this increase was not statistically significant (Figure 4E, F). These findings  
188 suggest that the anti-metastatic effect of Gas6 blockade in pancreatic cancer is not  
189 due to changes in angiogenesis or fibrosis.

190

191

192



193 **Gas6 blockade does not affect myeloid cells or T cells**

194 TAM receptors are also expressed by immune cells and regulate myeloid cell and T-  
195 cell functions [3, 46]. Thus, next, with the aim to understand the systemic effect of  
196 Gas6 blockade in myeloid cells and T cells in pancreatic cancer, we evaluated the  
197 number and activation status of myeloid cells and T cells in pancreatic tumors, blood  
198 and metastatic tissues using mass and flow cytometry. Mass cytometry analysis of  
199 myeloid (CD11b+) cells, neutrophils/MDSCs (CD11b+/Ly6G+), monocytes  
200 (CD11b+/Ly6C+), macrophages (CD11b+/F4/80+), MHC-II+, CD206+ and PD-L1+  
201 macrophages (Figure 5A) and T cells (CD3+), helper T-cells (CD3+/ CD4+),  
202 regulatory T cells (CD3+/CD4+/CD25+), cytotoxic T cells (CD3+/CD8+),  
203 activated/exhausted cytotoxic T cells (CD8+/CD69+; CD8+/PD-1+) (Figure 5B) from  
204 pancreatic tumors from control versus anti-Gas6 treated mice did not show any  
205 significant differences (Figure 5A, B and Supplementary Figure 3 A, B). Similarly,  
206 myeloid cell and T cell numbers in blood (Supplementary Figure 4A, B) and  
207 metastatic lungs from mice treated with control or anti-Gas6 antibody remained the  
208 same (Supplementary Figure 5A, B).

209 **Gas6 blockade restores NK cell activation and infiltration in metastatic lesions**

210 TAM signaling is involved in the development of natural killer (NK) cells [47]. In an  
211 elegant study, Paolino et al., demonstrated that TAM receptor inhibition activates NK  
212 cells cytotoxic function and thereby decreases metastasis in mouse models of breast  
213 cancer and melanoma [9]. Thus, we next hypothesized that the anti-metastatic effect  
214 of Gas6 blockade we observe in our pancreatic cancer model could be due to a re-  
215 activation of NK cells. To test this hypothesis we evaluated NK cells in tumor  
216 draining lymph nodes, primary pancreatic tumors and metastatic lesions of mice

217 treated with control IgG or anti-Gas6 antibody. The number of NK cells in lung  
218 metastatic lesions was significantly higher in mice treated with anti-Gas6 antibody  
219 compared to control treated mice (Figure 6 A, B). The number of NK cells, and in  
220 particular the number of proliferating NK cells, was also increased in tumor draining  
221 lymph nodes from anti-Gas6 treated mice compared to control treated mice (Figure 6  
222 C, D). However, NK cells were almost absent in all primary tumors from both anti-  
223 Gas6 and control treated mice (except for one anti-Gas6 treated pancreatic tumor).  
224 (Supplementary Figure 6).

225

## 226 **Discussion**

227 The data presented in this study describe a dual anti-tumor effect of Gas6 blockade  
228 in pancreatic tumors, shedding light on the anti-cancer mechanism of action of  
229 inhibitors of the Gas6-Axl pathway and supporting the rationale for using anti-Gas6  
230 therapy in pancreatic cancer patients. In these studies we show that blockade of  
231 Gas6 in pancreatic tumors acts simultaenously on both the tumor cells, reversing  
232 their plasticity, as well as on NK cells, promoting their activation and recruitment to  
233 the metastatic site (Figure 7). This dual function of anti-Gas6 therapy explains our  
234 observation that Gas6 blockade inhibits both the number and the size of the  
235 metastatic lesions. These findings suggest that anti-Gas6 therapy impairs several  
236 steps of the metastatic cascade including the initial spreading of tumor cells and the  
237 metastatic outgrowth of disseminated pancreatic cancer cells by acting on both the  
238 tumor cells and the NK cells.

239 So far many studies have focused on the cancer-cell autonomous role of Gas6 and  
240 based on their effect on tumor cell proliferation and plasticity several inhibitors of the  
241 Gas6-Axl pathways are currently being tested in pancreatic cancer patients.  
242 Our studies show that Gas6 inhibition in pancreatic cancer not only affects the tumor  
243 cells but also the NK cells, thus suggesting that the activation status of NK cells  
244 should also be assessed in patients and could be used as a biomarker to monitor  
245 response to Gas6/Axl inhibitors.

246 Gas6/Axl signaling is a negative regulator of the immune system and inhibition of the  
247 Gas6-Axl signaling leads to autoimmunity [4]. While the function of Gas6-Axl  
248 signaling on tumor cell proliferation, EMT, migration and drug resistance has been  
249 extensively studied [5], only a few studies have investigated the role of Gas6/Axl  
250 signaling in the immune system in the context of cancer [7, 9, 24]. Guo et al., found  
251 that the Axl inhibitor R428 inhibited tumor growth of subcutaneously implanted  
252 murine 4T1 breast cancer cells and intra-peritoneally implanted murine ID8 ovarian  
253 cancer cells by activating CD4+ and CD8+ T cells [7]. Inspired by this study, we  
254 investigated whether, in our pancreatic cancer model, Gas6 blockade supports the  
255 activation of T cells. Unlike Guo et al., we did not observe any statistically significant  
256 difference in CD4+ or CD8+ T cells in pancreatic tumors, blood or metastatic tissues,  
257 in control versus anti-Gas6 treated mice. Ludwig et al., found that treating mouse  
258 pancreatic tumors with the Axl inhibitor BGB324 decreased the number of tumor  
259 associated macrophages (TAMs) [24]. However, in our study, blocking Gas6 did not  
260 affect TAMs or other myeloid cell populations in primary tumors, blood or metastatic  
261 organs. Together, these results suggest that Axl inhibition may act on the immune  
262 system differently to Gas6 blockade affecting T cells or macrophages versus NK  
263 cells. In another study, Paolino et al., showed that TAM receptor inhibition activates

264 NK cells in mouse tumor models of melanoma and breast cancer leading to  
265 decreased tumor growth [9]. In agreement with these findings, we found that  
266 blocking Gas6 in mice bearing pancreatic tumors, increases NK cell activation in  
267 tumor draining lymph nodes and NK cell recruitment to the metastatic site, and  
268 decreases pancreatic cancer metastasis.

269 Inhibition of the Gas6-Axl pathway has been shown to reverse EMT, tumor migration  
270 and intra-tumoral microvessel density in pancreatic cancer [23]. In agreement with  
271 these findings, we found that Gas6 blockade indeed partially reverses EMT of  
272 pancreatic cancer cells, however, we did not observe any significant changes in  
273 tumor angiogenesis in our model. Pancreatic tumors are usually hypo-vascularized  
274 compared to a normal pancreas and anti-angiogenic therapies have not been  
275 successful in pancreatic cancer [48]. Similar to the human disease, in our pancreatic  
276 mouse tumor model, tumors are poorly vascularized and blocking Gas6 did not show  
277 any further decrease in tumor vascularization. Loges et al., previously showed that  
278 tumor associated macrophages (TAMs) produce Gas6 in various mouse tumor  
279 models [11]. In our study we find that both TAMs and CAFs are the main sources of  
280 Gas6 in pancreatic tumors. These findings suggest that the abundance of TAMs and  
281 CAFs in pancreatic cancer patients could be used to determine which patients would  
282 benefit the most from anti-Gas6 therapy.

283 In conclusion, our studies suggest that in pancreatic cancer, Gas6 is secreted by  
284 both TAMs and CAFs and blockade of Gas6 has a dual anti-metastatic effect by  
285 acting on both the tumor cells and the NK cells. Thus, inactivation of Gas6 signaling  
286 can promote anti-tumor immunity, via NK cell activation, in pancreatic tumors. Since  
287 this Gas6-dependent immune regulation of NK cells is also conserved in humans,  
288 anti-Gas6-Axl therapies are likely to promote anti-tumor immunity, via NK cell

289 activation, in pancreatic cancer patients. This study provides further mechanistic  
290 insights into the mode of action of anti-Gas6 therapy and suggests the use of NK  
291 cells as an additional biomarker for response to anti-Gas6 therapy in pancreatic  
292 cancer patients.

293

## 294 **Materials and Methods**

### 295 **Generation of primary KPC-derived pancreatic cancer cells**

296 The murine pancreatic cancer cells KPC FC1242 were generated in the Tuveson lab  
297 (Cold Spring Harbor Laboratory, New York, USA) isolated from pancreatic ductal  
298 adenocarcinoma (PDA) tumor tissues obtained from LSL-Kras<sup>G12D</sup>; LSL-Trp53<sup>R172H</sup>;  
299 Pdx1-Cre mice of a pure C57BL/6 background as described previously with minor  
300 modifications [49].

### 301 **Generation of primary macrophages, primary pancreatic fibroblasts, 302 macrophage (MCM) and fibroblasts (FCM) conditioned media**

303 Primary murine macrophages were generated by flushing the bone marrow from the  
304 femur and tibia of 6-8 week old C57BL/6 mice followed by incubation for 5 days in  
305 DMEM containing 10% FBS and 10 ng/mL murine M-CSF (Peprotech). Primary  
306 pancreatic stellate cells were isolated from the pancreas of C57BL/6 mice by density  
307 gradient centrifugation, and were cultured on uncoated plastic dishes in IMDM with  
308 10% FBS and 4mM L-glutamine. Under these culture conditions pancreatic stellate  
309 cells activated into myofibroblasts.

310 To generate macrophage and fibroblast conditioned media, cells were cultured in  
311 serum free media for 24-36 h, supernatant was harvested, filtered with 0.45µm filter,

312 concentrated using StrataClean Resin (Agilent Technologies) and immunoblotted for  
313 Gas6 (R&D Systems, AF885).

#### 314 **RTK arrays & immunoblotting**

315 Cells were serum starved or treated with macrophage conditioned media for 30 min  
316 or 3h, harvested and lysed in RIPA buffer (150 mM NaCl, 10 mM Tris-HCl pH 7.2,  
317 0.1% SDS, 1% Triton X-100, 5 mM EDTA) supplemented with a complete protease  
318 inhibitor mixture (SIGMA), a phosphatase inhibitor cocktail (Invitrogen), 1 mM PMSF  
319 and 0.2 mM Na<sub>3</sub>VO<sub>4</sub>. Cell lysates were analyzed with the Phospho-RTK Array Kit  
320 (R&D Systems). Immunoblotting analyses was performed using phospho-Axl  
321 antibody (R&D systems, AF2228), Axl antibody (R&D systems, AF854 ref) and  
322 tubulin antibody (Sigma, T6199) as loading control.

#### 323 **Syngeneic Orthotopic pancreatic cancer model**

324  $1 \times 10^6$  primary KPC<sup>luc/zsGreen</sup> cells (FC1242<sup>luc/zsGreen</sup>) isolated from a pure C57Bl/6  
325 background were implanted into the pancreas of immune-competent syngeneic  
326 C57Bl/6 six- to eight-week-old female mice, and tumors were established for two  
327 weeks before beginning treatment. Mice were administered i.p with Gas6  
328 neutralizing antibody (2 mg/kg), or IgG isotype control antibody, every 3 -4 days for  
329 15 days before harvest.

#### 330 **Analysis and quantification of immune cells in pancreatic tumors by mass** 331 **cytometry**

332 Pancreatic tumors were resected from the mice and mechanically and enzymatically  
333 digested in Hanks Balanced Salt Solution (HBSS) with 1 mg/mL Collagenase P  
334 (Roche) Cell suspensions were centrifuged for 5 min at 1500 rpm,

335 resuspended in HBSS and filtered through a 500  $\mu\text{m}$  polypropylene mesh  
336 (Spectrum Laboratories). Cells were resuspended in 1 mL 0.05% Trypsin and  
337 incubated at 37°C for 5 minutes. Cells were filtered through a 70  $\mu\text{m}$  cell strainer and  
338 resuspended in Maxpar cell staining buffer (Fluidigm). The samples were centrifuged  
339 for 5 min at 450 x g and supernatant removed. The cells were subsequently stained  
340 with Cell-ID 195-Cisplatin (Fluidigm) viability marker diluted 1:40 in Maxpar PBS  
341 (Fluidigm) for 5 min. Cells were centrifuged at 450 x g for 5 min and washed twice in  
342 Maxpar cell staining buffer. Samples were blocked for 10 minutes on ice with 1:100  
343 diluted FC Block (BD Pharmingen, Clone 2.4G2) and metal-conjugated antibody  
344 cocktail added and incubated for 30 min at 4°C. Antibodies were used at the  
345 concentrations recommended by manufacturers. Cells were washed twice in cell  
346 staining buffer and stained with 125  $\mu\text{M}$  191-Intercalator-Ir (Fluidigm) diluted in  
347 1:2000 Maxpar fix and perm buffer (Fluidigm) overnight at 4 °C. The cells were  
348 washed twice in Maxpar cell staining buffer and centrifuged at 800 x g for 5 min. A  
349 post-fix was performed by incubating the cells in 1.6% PFA for 30 min at RT. Cells  
350 were washed twice in 18 $\Omega$  distilled water (Fluidigm), mixed 1:10 with EQTM Four  
351 Element Calibration Beads (Fluidigm) and acquired on the Helios CyTOF system  
352 (Fluidigm). Samples were acquired at a rate of around 200 cells/s. All generated  
353 FCS files were normalized and beads removed [50]. All analysis was performed in  
354 Cytobank: Manual gating was used to remove dead cells (195Pt+) and debris and to  
355 identify single cells (191 Ir+).

356 viSNE analysis was performed on the data utilising t-stochastic neighbour  
357 embedding (t-SNE) mapping based on high dimensional relationships. CD45+  
358 population selected by manual gating was used as the starting cell population and  
359 using proportional sampling viSNE unsupervised clustering was performed. Manual

360 gating was then performed on the viSNE map created to determine cell population  
361 percentages. Spanning-tree Progression Analysis of Density-normalized Events  
362 (SPADE) analysis was performed in Cytobank using manual gated CD45+ cells, 200  
363 target number of nodes and 10% down sampled events, to equalize the density in  
364 different parts of the cloud. Gating of cell populations was performed to identify major  
365 cell populations and percentages.

### 366 **FACS sorting and analysis of blood and lungs by flow cytometry**

367 Single cell suspensions from murine primary pancreatic tumors and pulmonary  
368 metastasis were prepared by mechanical and enzymatic disruption and tumor cells,  
369 tumor associated macrophages and stromal cells were analysed and sorted using  
370 flow cytometry (FACS ARIA II, BD Bioscience). Samples were digested as outlined  
371 above, the cells were then filtered through a 70 µm cell strainer and resuspended in  
372 PBS + 1% BSA, blocked for 10 minutes on ice with FC Block (BD Pharmingen,  
373 Clone 2.4G2) and stained with Sytox® blue viability marker (Life Technologies)  
374 and conjugated antibodies anti-CD45-PE/Cy7 (Biolegend, clone 30-F11) and  
375 anti-F4/80-APC (Biolegend, clone BM8).

376 Blood was collected from mice via tail vein bleed in EDTA-tubes. Red blood cell lysis  
377 was performed and resulting leukocytes were resuspended in PBS + 1% BSA and  
378 blocked for 10 mins on ice with FC block and stained with Sytox® blue viability  
379 marker and conjugated antibodies anti-CD45-APC/Cy7 (Biolegend, 103115), anti-  
380 CD11b-APC (Biolegend, 101212), anti-Ly6G-PerCP-Cy5.5 (Biolegend, 127616),  
381 anti-Ly6C-PE (Biolegend, 128008), anti-CD3-PE-Cy7 (Biolegend, 100320), anti-  
382 CD4-PE (Biolegend, 100408) and anti-CD8-PerCP-Cy5.5 (Biolegend, 100734). Cell  
383 analysis was performed using FACS Canto II.



## 384 **Gene expression**

385 Total RNA was isolated from FACS sorted tumor cells, tumor associated  
386 macrophages and non-immune stromal cells from primary pancreatic tumors as  
387 described in Qiagen Rneasy protocol. Total RNA from the different cell populations  
388 was extracted using a high salt lysis buffer (Guanidine thiocyanate 5 M, sodium citrate  
389 2.5 uM, lauryl sarcosine 0.5% in H<sub>2</sub>O) to improve RNA quality followed by  
390 purification using Qiagen Rneasy protocol. cDNA was prepared from 1µg  
391 RNA/sample, and qPCR was performed using gene specific QuantiTect Primer  
392 Assay primers from Qiagen. Relative expression levels were normalized to *gapdh*  
393 expression according to the formula  $2^{-(Ct_{gene\ of\ interest} - Ct_{gapdh})}$  [51]

## 394 **Quantification of metastasis**

### 395 *By IVIS imaging*

396 IVIS spectral imaging of bioluminescence was used for orthotopically implanted  
397 tumor cells expressing firefly luciferase using IVIS spectrum system (Caliper Life  
398 Sciences). Organs were resected for *ex vivo* imaging coated in 100 µL D-luciferin  
399 (Perkin Elmer) for 1 min and imaged for 2 min at automated optimal exposure.  
400 Analysis was performed on the Living Image software (PerkinElmer) to calculate the  
401 relative bioluminescence signal from photon per second mode normalised to imaging  
402 area (total flux) as recommended by the manufacturer.

### 403 *By H&E staining*

404 FFPE lungs were serially sectioned through the entire lung using microtome at 4 µm  
405 thickness. Sections were stained with H&E and images were taken using a Zeiss  
406 Observer Z1 Microscope (Zeiss) to identify metastatic foci. The number of foci were  
407 counted, and the total area of metastatic foci was measured using Zen imaging  
408 software. Metastatic burden was calculated by the following equations:

409 No. of foci per 100 mm<sup>2</sup>: *(Average no. foci per section/ average tissue area per*  
410 *section (mm<sup>2</sup>)) \*100*

411 Average metastatic lesion size (mm<sup>2</sup>): *Average total area of metastasis (mm<sup>2</sup>)/*  
412 *average number of foci per section*

413 Total metastatic burden: *Sum of area of each foci of each section*

#### 414 **Immunohistochemistry and Immunofluorescence**

415 Deparaffinization and antigen retrieval was performed using an automated DAKO  
416 PT-link. Paraffin-embedded pancreatic tumors, lymph nodes and lung metastasis  
417 tissues were immuno-stained using the DAKO envision+ system-HRP.

418 *Antibodies and procedure used for Immunohistochemistry:*

419 All primary antibodies were incubated for 2 hours at room temperature: αSMA  
420 (Abcam, ab5694 used at 1:200 after low pH antigen retrieval), CD31 (Cell signalling  
421 technology, CST 77699 used at 1:100 after low pH antigen retrieval), NKp46  
422 (Biorbyt, orb13333 used at 1:200 after low pH antigen retrieval), CD3 (Abcam,  
423 ab5690 used at 1:100 after high pH antigen retrieval), CD68 (Abcam, ab31630 used  
424 at 1:400 after low pH antigen retrieval) and CD206 (Abcam, ab8918 used at 1:400  
425 after low pH antigen retrieval). Subsequently, samples were incubated with  
426 secondary HRP-conjugated antibody (from DAKO envision kit) for 30 min at room  
427 temperature. All antibodies were prepared in antibody diluent from Dako envision kit.  
428 Staining was developed using diamino-benzidine and counterstained with  
429 hematoxylin.

430 Human paraffin-embedded PDA tissue sections were incubated overnight at RT with  
431 the following primary antibodies: phospho-Axl (R&D, AF2228, used 1:500 after high  
432 pH antigen retrieval), CD163 (Abcam, ab74604 pre-diluted after low pH antigen  
433 retrieval), αSMA (Abcam, ab5694 used 1:100 after low pH antigen retrieval),

#### 434 *Antibodies and procedure used for Immunofluorescence*

435 After low pH antigen retrieval, lymph node tissue sections derived from mice bearing  
436 pancreatic tumors were incubated overnight at RT with the following primary  
437 antibodies: NKp46 (R&D systems AF2225, used at 1:25), Ki67 (Abcam ab15580,  
438 used at 1:1000). Samples were washed with PBS and incubated with donkey anti-  
439 goat 594 (Abcam ab150132) and donkey anti-rabbit 488 (Abcam ab98473)  
440 secondary antibodies respectively, all used at 1:300 and DAPI at 1:600 for 2 hours  
441 at RT. Slides were washed with PBS, final quick wash with distilled water and  
442 mounted using DAKO fluorescent mounting media.

443 Human PDA frozen tissue sections were fixed with cold acetone, permeabilized in  
444 0.1% Triton, blocked in 8% goat serum and incubated overnight at 4°C with anti-  
445 phospho Axl (R&D, AF2228, diluted 1:200) CK11 (Cell signaling, CST 4545, diluted  
446 1:200), followed by fluorescently labelled secondary antibodies goat anti mouse 488  
447 (Abcam ab98637), goat anti-rabbit 594 (Abcam ab98473) used at 1:300 for 2 hours  
448 at RT slides were washed with PBS, final quick wash with distilled water and  
449 mounted using DAKO fluorescent mounting media.

#### 450 **Statistical Methods**

451 Statistical significance for *in vitro* assays and animal studies was assessed using  
452 unpaired two-tailed Student *t* test and the GraphPad Prism 5 program. All error bars  
453 indicate SD of n=3 (*in vitro* studies) or SEM n= 7-8 (animal studies).

#### 454 **Institutional approvals**

455 All studies involving human tissues were approved by the University of Liverpool and  
456 were considered exempt according to national guidelines. Human pancreatic cancer  
457 samples were obtained from the Liverpool Tissue Bank from patients that consented

458 to use the surplus material for research purposes. All animal experiments were  
459 performed in accordance with current UK legislation under an approved project  
460 licence (reference number: 403725). Mice were housed under specific pathogen-free  
461 conditions at the Biomedical Science Unit at the University of Liverpool.

## 462 **AUTHOR CONTRIBUTIONS**

463 L.I designed experiments and performed most of the experiments including *in vivo*  
464 experiments, mass cytometry/flow cytometry, cell isolations, immunohistochemical  
465 stainings and qPCR experiments. T. L designed experiments, helped with tissue  
466 harvesting, tissue stainings, primary cell isolations and qPCR experiments. A.M.  
467 designed experiments, helped with tissue harvesting and tissue stainings. M.C.S.  
468 provided conceptual advice and help with *in vivo* experiments. A.M and L.I wrote the  
469 manuscript. A.M. conceived and supervised the project. All authors helped with the  
470 analysis and interpretation of the data, the preparation of the manuscript, and  
471 approved the manuscript.

## 472 **Acknowledgments**

473 We thank David Tuveson and Danielle Engle for providing the mouse KPC-derived  
474 pancreatic cancer cells. We thank Arthur Taylor and Patricia Murray for transducing  
475 the KPC cells with zsGreen/luciferase lentivirus. We thank Almudena Santos for  
476 technical support with the immunohistochemistry. We also acknowledge the  
477 Liverpool Tissue Bank for providing tissue samples, the mass/flow cytometry/cell  
478 sorting facility, the biomedical science unit and the pre-clinical *in vivo* imaging facility  
479 for provision of equipment and technical assistance. We thank the patients and their  
480 families who contributed with tissue samples to these studies.

481

## 482 Disclosure of Potential Conflicts of Interest

483 The authors disclose no potential conflicts of interest.

## 484 Grant Support

485 These studies were supported by a Sir Henry Dale research fellowship to Dr Ainhoa  
486 Mielgo, jointly funded by the Wellcome Trust and the Royal Society (grant number  
487 102521/Z/13/Z), a Medical Research Council to Dr Michael Schmid (grant number  
488 MR/L000512/1) and North West Cancer Research funding to Dr Ainhoa Mielgo.

## 489 References

- 490  
491 1 Paolino M, Penninger JM. The Role of TAM Family Receptors in Immune Cell  
492 Function: Implications for Cancer Therapy. *Cancers (Basel)* 2016; 8.
- 493  
494 2 Sasaki T, Knyazev PG, Clout NJ, Cheburkin Y, Gohring W, Ullrich A *et al.* Structural  
495 basis for Gas6-Axl signalling. *EMBO J* 2006; 25: 80-87.
- 496  
497 3 Lemke G, Rothlin CV. Immunobiology of the TAM receptors. *Nature reviews*  
498 *Immunology* 2008; 8: 327-336.
- 499  
500 4 Lu Q, Lemke G. Homeostatic regulation of the immune system by receptor tyrosine  
501 kinases of the Tyro 3 family. *Science* 2001; 293: 306-311.
- 502  
503 5 Wu G, Ma Z, Hu W, Wang D, Gong B, Fan C *et al.* Molecular insights of Gas6/TAM  
504 in cancer development and therapy. *Cell Death Dis* 2017; 8: e2700.
- 505  
506 6 Hafizi S, Dahlback B. Gas6 and protein S. Vitamin K-dependent ligands for the Axl  
507 receptor tyrosine kinase subfamily. *FEBS J* 2006; 273: 5231-5244.
- 508  
509 7 Guo Z, Li Y, Zhang D, Ma J. Axl inhibition induces the antitumor immune response  
510 which can be further potentiated by PD-1 blockade in the mouse cancer models.  
511 *Oncotarget* 2017; 8: 89761-89774.
- 512  
513 8 Myers KV, Amend SR, Pienta KJ. Targeting Tyro3, Axl and MerTK (TAM receptors):  
514 implications for macrophages in the tumor microenvironment. *Molecular cancer* 2019;  
515 18: 94.
- 516

- 517 9 Paolino M, Choidas A, Wallner S, Pranjic B, Uribealago I, Loeser S *et al.* The E3  
518 ligase Cbl-b and TAM receptors regulate cancer metastasis via natural killer cells.  
519 *Nature* 2014; 507: 508-512.
- 520  
521 10 Rankin EB, Fuh KC, Castellini L, Viswanathan K, Finger EC, Diep AN *et al.* Direct  
522 regulation of GAS6/AXL signaling by HIF promotes renal metastasis through SRC  
523 and MET. *Proc Natl Acad Sci U S A* 2014; 111: 13373-13378.
- 524  
525 11 Loges S, Schmidt T, Tjwa M, van Geyte K, Lievens D, Lutgens E *et al.* Malignant  
526 cells fuel tumor growth by educating infiltrating leukocytes to produce the mitogen  
527 Gas6. *Blood* 2010; 115: 2264-2273.
- 528  
529 12 Ireland L, Santos A, Campbell F, Figueiredo C, Hammond D, Ellies LG *et al.*  
530 Blockade of insulin-like growth factors increases efficacy of paclitaxel in metastatic  
531 breast cancer. *Oncogene* 2018.
- 532  
533 13 Nielsen SR, Quaranta V, Linford A, Emeagi P, Rainer C, Santos A *et al.*  
534 Macrophage-secreted granulins support pancreatic cancer metastasis by inducing  
535 liver fibrosis. *Nature cell biology* 2016; 18: 549-560.
- 536  
537 14 Qian BZ, Zhang H, Li J, He T, Yeo EJ, Soong DY *et al.* FLT1 signaling in metastasis-  
538 associated macrophages activates an inflammatory signature that promotes breast  
539 cancer metastasis. *The Journal of experimental medicine* 2015; 212: 1433-1448.
- 540  
541 15 DeNardo DG, Brennan DJ, Rexhepaj E, Ruffell B, Shiao SL, Madden SF *et al.*  
542 Leukocyte complexity predicts breast cancer survival and functionally regulates  
543 response to chemotherapy. *Cancer Discov* 2011; 1: 54-67.
- 544  
545 16 Ireland L, Santos A, Ahmed MS, Rainer C, Nielsen SR, Quaranta V *et al.*  
546 Chemoresistance in Pancreatic Cancer Is Driven by Stroma-Derived Insulin-Like  
547 Growth Factors. *Cancer Res* 2016; 76: 6851-6863.
- 548  
549 17 Shree T, Olson OC, Elie BT, Kester JC, Garfall AL, Simpson K *et al.* Macrophages  
550 and cathepsin proteases blunt chemotherapeutic response in breast cancer. *Genes*  
551 *Dev* 2011; 25: 2465-2479.
- 552  
553 18 Siegel RL, Miller KD, Jemal A. Cancer statistics, 2019. *CA: a cancer journal for*  
554 *clinicians* 2019; 69: 7-34.
- 555  
556 19 Ireland LV, Mielgo A. Macrophages and Fibroblasts, Key Players in Cancer  
557 Chemoresistance. *Front Cell Dev Biol* 2018; 6: 131.
- 558  
559 20 Zambirinis CP, Miller G. Cancer Manipulation of Host Physiology: Lessons from  
560 Pancreatic Cancer. *Trends Mol Med* 2017; 23: 465-481.

561

- 562 21 Song X, Wang H, Logsdon CD, Rashid A, Fleming JB, Abbruzzese JL *et al.*  
563 Overexpression of receptor tyrosine kinase Axl promotes tumor cell invasion and  
564 survival in pancreatic ductal adenocarcinoma. *Cancer* 2011; 117: 734-743.
- 565  
566 22 Koorstra JB, Karikari CA, Feldmann G, Bisht S, Rojas PL, Offerhaus GJ *et al.* The  
567 Axl receptor tyrosine kinase confers an adverse prognostic influence in pancreatic  
568 cancer and represents a new therapeutic target. *Cancer Biol Ther* 2009; 8: 618-626.
- 569  
570 23 Kirane A, Ludwig KF, Sorrelle N, Haaland G, Sandal T, Ranaweera R *et al.* Warfarin  
571 Blocks Gas6-Mediated Axl Activation Required for Pancreatic Cancer Epithelial  
572 Plasticity and Metastasis. *Cancer Res* 2015; 75: 3699-3705.
- 573  
574 24 Ludwig KF, Du W, Sorrelle NB, Wnuk-Lipinska K, Topalovski M, Toombs JE *et al.*  
575 Small-Molecule Inhibition of Axl Targets Tumor Immune Suppression and Enhances  
576 Chemotherapy in Pancreatic Cancer. *Cancer Res* 2018; 78: 246-255.
- 577  
578 25 Gay CM, Balaji K, Byers LA. Giving AXL the axe: targeting AXL in human  
579 malignancy. *Br J Cancer* 2017; 116: 415-423.
- 580  
581 26 Pylayeva-Gupta Y, Das S, Handler JS, Hajdu CH, Coffre M, Korolov SB *et al.* IL35-  
582 Producing B Cells Promote the Development of Pancreatic Neoplasia. *Cancer Discov*  
583 2016; 6: 247-255.
- 584  
585 27 Zhu Y, Knolhoff BL, Meyer MA, Nywening TM, West BL, Luo J *et al.* CSF1/CSF1R  
586 blockade reprograms tumor-infiltrating macrophages and improves response to T-cell  
587 checkpoint immunotherapy in pancreatic cancer models. *Cancer Res* 2014; 74:  
588 5057-5069.
- 589  
590 28 Gomes AM, Carron EC, Mills KL, Dow AM, Gray Z, Fecca CR *et al.* Stromal Gas6  
591 promotes the progression of premalignant mammary cells. *Oncogene* 2019; 38:  
592 2437-2450.
- 593  
594 29 Loges S, Schmidt T, Tjwa M, van Geyte K, Lievens D, Lutgens E *et al.* Malignant  
595 cells fuel tumor growth by educating infiltrating leukocytes to produce the mitogen  
596 Gas6. *Blood* 2010; 115: 2264-2273.
- 597  
598 30 Baumann C, Ullrich A, Torka R. GAS6-expressing and self-sustaining cancer cells in  
599 3D spheroids activate the PDK-RSK-mTOR pathway for survival and drug resistance.  
600 *Molecular Oncology* 2017; 11: 1430-1447.
- 601  
602 31 Fourcot A, Couchie D, Chobert MN, Zafrani ES, Mavier P, Laperche Y *et al.* Gas6  
603 deficiency prevents liver inflammation, steatohepatitis, and fibrosis in mice. *Am J*  
604 *Physiol Gastrointest Liver Physiol* 2011; 300: G1043-1053.
- 605  
606 32 Korshunov VA, Mohan AM, Georger MA, Berk BC. Axl, a receptor tyrosine kinase,  
607 mediates flow-induced vascular remodeling. *Circ Res* 2006; 98: 1446-1452.

- 608  
609 33 Melaragno MG, Fridell YW, Berk BC. The Gas6/Axl system: a novel regulator of  
610 vascular cell function. *Trends Cardiovasc Med* 1999; 9: 250-253.
- 611  
612 34 O'Donnell K, Harkes IC, Dougherty L, Wicks IP. Expression of receptor tyrosine  
613 kinase Axl and its ligand Gas6 in rheumatoid arthritis: evidence for a novel  
614 endothelial cell survival pathway. *Am J Pathol* 1999; 154: 1171-1180.
- 615  
616 35 Antony J, Tan TZ, Kelly Z, Low J, Choolani M, Recchi C *et al.* The GAS6-AXL  
617 signaling network is a mesenchymal (Mes) molecular subtype-specific therapeutic  
618 target for ovarian cancer. *Sci Signal* 2016; 9: ra97.
- 619  
620 36 Wilson C, Ye X, Pham T, Lin E, Chan S, McNamara E *et al.* AXL inhibition sensitizes  
621 mesenchymal cancer cells to antimetabolic drugs. *Cancer Res* 2014; 74: 5878-5890.
- 622  
623 37 Diepenbruck M, Christofori G. Epithelial-mesenchymal transition (EMT) and  
624 metastasis: yes, no, maybe? *Curr Opin Cell Biol* 2016; 43: 7-13.
- 625  
626 38 Saitoh M. Involvement of partial EMT in cancer progression. *J Biochem* 2018; 164:  
627 257-264.
- 628  
629 39 Kim YS, Jung SH, Jung DH, Choi SJ, Lee YR, Kim JS. Gas6 stimulates angiogenesis  
630 of human retinal endothelial cells and of zebrafish embryos via ERK1/2 signaling.  
631 *PLoS One* 2014; 9: e83901.
- 632  
633 40 Zuo PY, Chen XL, Lei YH, Liu CY, Liu YW. Growth arrest-specific gene 6 protein  
634 promotes the proliferation and migration of endothelial progenitor cells through the  
635 PI3K/AKT signaling pathway. *Int J Mol Med* 2014; 34: 299-306.
- 636  
637 41 Stenhoff J, Dahlback B, Hafizi S. Vitamin K-dependent Gas6 activates ERK kinase  
638 and stimulates growth of cardiac fibroblasts. *Biochem Biophys Res Commun* 2004;  
639 319: 871-878.
- 640  
641 42 Leake I. Pancreatic cancer: surprising role for fibrosis. *Nat Rev Gastroenterol*  
642 *Hepatol* 2014; 11: 396.
- 643  
644 43 Ozdemir BC, Pentcheva-Hoang T, Carstens JL, Zheng X, Wu CC, Simpson TR *et al.*  
645 Depletion of Carcinoma-Associated Fibroblasts and Fibrosis Induces  
646 Immunosuppression and Accelerates Pancreas Cancer with Reduced Survival.  
647 *Cancer Cell* 2015; 28: 831-833.
- 648  
649 44 Rhim AD, Oberstein PE, Thomas DH, Mirek ET, Palermo CF, Sastra SA *et al.*  
650 Stromal elements act to restrain, rather than support, pancreatic ductal  
651 adenocarcinoma. *Cancer Cell* 2014; 25: 735-747.

652



- 653 45 Weniger M, Honselmann KC, Liss AS. The Extracellular Matrix and Pancreatic  
654 Cancer: A Complex Relationship. *Cancers (Basel)* 2018; 10.
- 655  
656 46 Cabezón R, Carrera-Silva EA, Florez-Grau G, Errasti AE, Calderon-Gomez E,  
657 Lozano JJ *et al.* MERTK as negative regulator of human T cell activation. *J Leukoc*  
658 *Biol* 2015; 97: 751-760.
- 659  
660 47 Walzer T, Vivier E. NK cell development: gas matters. *Nat Immunol* 2006; 7: 702-  
661 704.
- 662  
663 48 Feig C, Gopinathan A, Neesse A, Chan DS, Cook N, Tuveson DA. The pancreas  
664 cancer microenvironment. *Clin Cancer Res* 2012; 18: 4266-4276.
- 665  
666 49 Hingorani SR, Wang LF, Multani AS, Combs C, Deramaudt TB, Hruban RH *et al.*  
667 Trp53(R172H) and Kras(G12D) cooperate to promote chromosomal instability and  
668 widely metastatic pancreatic ductal adenocarcinoma in mice. *Cancer Cell* 2005; 7:  
669 469-483.
- 670  
671 50 Finck R, Simonds EF, Jager A, Krishnaswamy S, Sachs K, Fantl W *et al.*  
672 Normalization of mass cytometry data with bead standards. *Cytometry Part A* 2013;  
673 83A: 483-+.
- 674  
675 51 Schmittgen TD, Livak KJ. Analyzing real-time PCR data by the comparative C-T  
676 method. *Nature Protocols* 2008; 3: 1101-1108.

677

678

679

## 680 **Figure legends**

### 681 **Figure 1. Pharmacological blockade of Gas6 inhibits pancreatic cancer**

#### 682 **metastasis.**

683 **(A)** KPC<sup>luc/zsGreen</sup> (zsGreen) -derived pancreatic tumor cells (FC1242<sup>luc/zsGreen</sup>)  
684 were orthotopically implanted into the pancreas of syngeneic C57BL/6 recipient  
685 mice, and mice were treated, starting at day 14 after tumor implantation, twice a  
686 week i.p., with either isotype control IgG antibody or Gas6 blocking antibody (0.5  
687 mg/ml?). Primary pancreatic tumors, livers, lungs and mesenteric lymph nodes were  
688 harvested at day 30. **(B)** Tumor weights (n= 11 mice for control IgG treatment group;  
689 n=12 mice for anti-Gas6 treatment groups). **(C)** Representative IVIS images of

690 metastatic lungs from control IgG and anti-Gas6 treated mice. **(D)** Quantification of  
691 number of lung metastatic foci per 100mm<sup>2</sup> in mice treated with control IgG or anti-  
692 Gas6 antibody. \*  $p \leq 0.05$ , using unpaired student T test. **(E)** Average size of  
693 pulmonary metastatic lesions in mice treated with control IgG or anti-Gas6 antibody.  
694 \*  $p \leq 0.05$ , using unpaired student T test. **(F)** Quantification of total metastatic burden  
695 in mice treated with control IgG or anti-Gas6 antibody. \*\*  $p \leq 0.01$ , using unpaired  
696 student T test. **(G)** Representative images of H&E staining of metastatic lungs from  
697 control IgG and anti-Gas6 treated mice. Scale bar 50  $\mu\text{m}$ .

698 **Figure 2. TAMs and CAFs are the main sources of Gas6 in pancreatic tumors**

699 **(A)** KPC<sup>luc/zsGreen</sup> (zsGreen) -derived tumor cells (FC1242<sup>luc/zsGreen</sup>) were  
700 orthotopically implanted into the pancreas of syngeneic recipient (C57/BL6) mice.  
701 Tumors were harvested and digested at day 23 after implantation and tumor cells,  
702 non-immune stromal cells, M1-like and M2-like macrophages were sorted by flow  
703 cytometry. *Gas6* mRNA levels were quantified in CD45-/zsGreen+ tumor cells,  
704 CD45-/zsGreen- non-immune stromal cells, CD45+/F4/80+/CD206- M1-like  
705 macrophages and CD45+/F4/80+/CD206+ M2-like macrophages isolated from  
706 murine pancreatic tumors. Values shown are the mean and SEM (n=3). **(B)**  
707 Quantification of *Gas6* mRNA expression levels in mouse primary macrophages and  
708 pancreatic fibroblasts. Values shown are the mean and SEM (n=3). **(C)**  
709 Immunoblotting analysis of *Gas6* secreted protein present in mouse macrophage  
710 conditioned media (MCM) and pancreatic fibroblast conditioned media (FCM). **(D)**  
711 Images show phospho-Axl,  $\alpha$ SMA (fibroblast marker) and CD68 (pan-macrophage  
712 marker) staining in naïve mouse pancreas and in serial sections of mouse PDA  
713 tissues. Scale bar = 50  $\mu\text{m}$ .

714 **Figure 3. AXL receptor is activated in both the tumor and stromal compartment**  
715 **in biopsies from PDA patients.**

716 **(A)** Immunofluorescent staining of human PDA biopsies with CK11 (tumor cell  
717 marker, in green), phospho-Axl receptor (in red), and nuclei (in blue). Scale bar, 50  
718  $\mu\text{m}$ . Yellow arrow indicates presence of phosphorylated Axl in the stromal  
719 compartment. White arrow indicates presence of phosphorylated Axl in the tumor  
720 cells. **(B)** Serial sections of biopsies from human PDA samples  
721 immunohistochemically stained for phospho-Axl, CD163 (macrophages) and  $\alpha\text{SMA}$   
722 (fibroblasts). Scale bars, 50  $\mu\text{m}$  and 100  $\mu\text{m}$ .

723

724 **Figure 4. Gas 6 blockade in pancreatic tumors partially affects EMT of tumor**  
725 **cells but does not significantly affect angiogenesis or collagen deposition.**

726 **(A)** Quantification of the expression levels of the EMT transcription factors: *Snail 1*,  
727 *Snail 2*, *Twist 1*, *Twist 2*, *Zeb 1* and *Zeb 2* in tumor cells isolated from mouse PDA  
728 tumors. Values shown are the mean and SEM (n=3). **(B)** Quantification of the  
729 expression levels of the epithelial markers: *E-cadherin*, *b-catenin*, *EpCAM* and the  
730 mesenchymal markers *vimentin* and *N-cadherin* in tumor cells isolated from mouse  
731 PDA tumors. Values shown are the mean and SEM (n=3). \*  $p \leq 0.05$ , using unpaired  
732 student T test; \*\*  $p \leq 0.01$ , using unpaired student T test; \*\*\*  $p \leq 0.005$ , using  
733 unpaired student T test. **(C)** Images of whole scanned pancreatic tumors from  
734 control and anti-Gas6 treated mice stained for CD31. **(D)** Quantification of CD31+  
735 staining in total tumor area. Values shown are the mean and SEM (n=3 per  
736 treatment group). n.s. no statistically significant differences, using unpaired student  
737 T test. **(E)** Images of whole scanned pancreatic tumors from control and anti-Gas6

738 treated mice stained with picrosirius red. **(F)** Quantification of picrosirius red +  
739 staining in total tumor area. Values shown are the mean and SEM (n=4 per  
740 treatment group). n.s. no statistically significant differences, using unpaired student  
741 T test.

742

743 **Figure 5. Gas6 blockade does not affect the composition or activation status of**  
744 **myeloid cells and T cells.**

745 **(A)** Mass cytometry quantification of CD11b + myeloid cells, Ly6C high/Ly6C low  
746 monocytes/MDSCs, Ly6G high/Ly6C low neutrophils/MDSCs, F4/80+ macrophages,  
747 MHCII+ macrophages, CD206+ macrophages and PD-L1+ macrophages in mouse  
748 pancreatic tumors treated with control IgG (n=3) or anti-Gas6 neutralizing antibody  
749 (n=4). **(B)** Mass cytometry quantification of CD3+ T cells, CD4+ T cells,  
750 CD4+/CD25+ regulatory T cells (Tregs), CD8+ T cells, CD69+/CD8+ T cells and PD-  
751 1+/CD8+ T cells in mouse pancreatic tumors treated with control IgG (n=3) or anti-  
752 Gas6 neutralizing antibody (n=4). Graphs were generated with ViSNE data using  
753 Cytobank software.

754

755 **Figure 6. Gas6 blockade increases NK cell numbers in metastatic lungs and in**  
756 **tumor draining lymph nodes.**

757 **(A)** Immunohistochemical staining of NK cells in metastatic lungs from pancreatic  
758 tumor bearing mice treated with control IgG or anti-Gas6 antibody. Lesions indicated  
759 by dashed line and NK cells by red asterisk. Scale bar, 50  $\mu$ m. **(B)** Quantification of  
760 NK cells in metastatic lung tissues from control IgG and anti-Gas6 treated mice.

761 Values shown are the mean and SEM (n=6 mice in IgG treatment group, n=7 mice in  
762 anti-Gas6 treatment group). \*\*  $p \leq 0.01$ , using unpaired student T test. **(C)**  
763 Immunofluorescent staining of NK cells in mesenteric lymph nodes from pancreatic  
764 tumor bearing mice treated with control IgG or anti-Gas6 antibody. NK marker  
765 NKp46 is shown in red, Ki67 is shown in green and nuclei were stained with DAPI (in  
766 blue). Scale bar, 50  $\mu\text{m}$ . **(D)** Quantification of NK cells in tumor draining lymph  
767 nodes from control IgG and anti-Gas6 treated mice. Values shown are the mean and  
768 SEM (n=6 mice IgG treatment group and n=7 mice anti-Gas6 treatment group, 3-6  
769 fields/ mouse tissue were quantified). \*  $p \leq 0.05$ , using unpaired student T test.

770

771 **Figure 7. Schematics depicting the multifunctional role of stroma-derived Gas6**  
772 **in pancreatic cancer.**

773 Gas6 produced by tumor associated macrophages (TAMs) and cancer associated  
774 fibroblasts (CAFs) in pancreatic tumors binds to Tyro-Axl-Mer (TAM) receptors  
775 expressed on the surface of both tumor cells and NK cells, and thereby acts on both:  
776 the tumor cells by EMT and metastasis and the NK cells by inactivating their anti-  
777 tumor function. *In vivo* blockade of Gas6 partially reverses tumor cells EMT and re-  
778 activates NK cells, leading to a decrease in pancreatic cancer metastasis.

779

**A**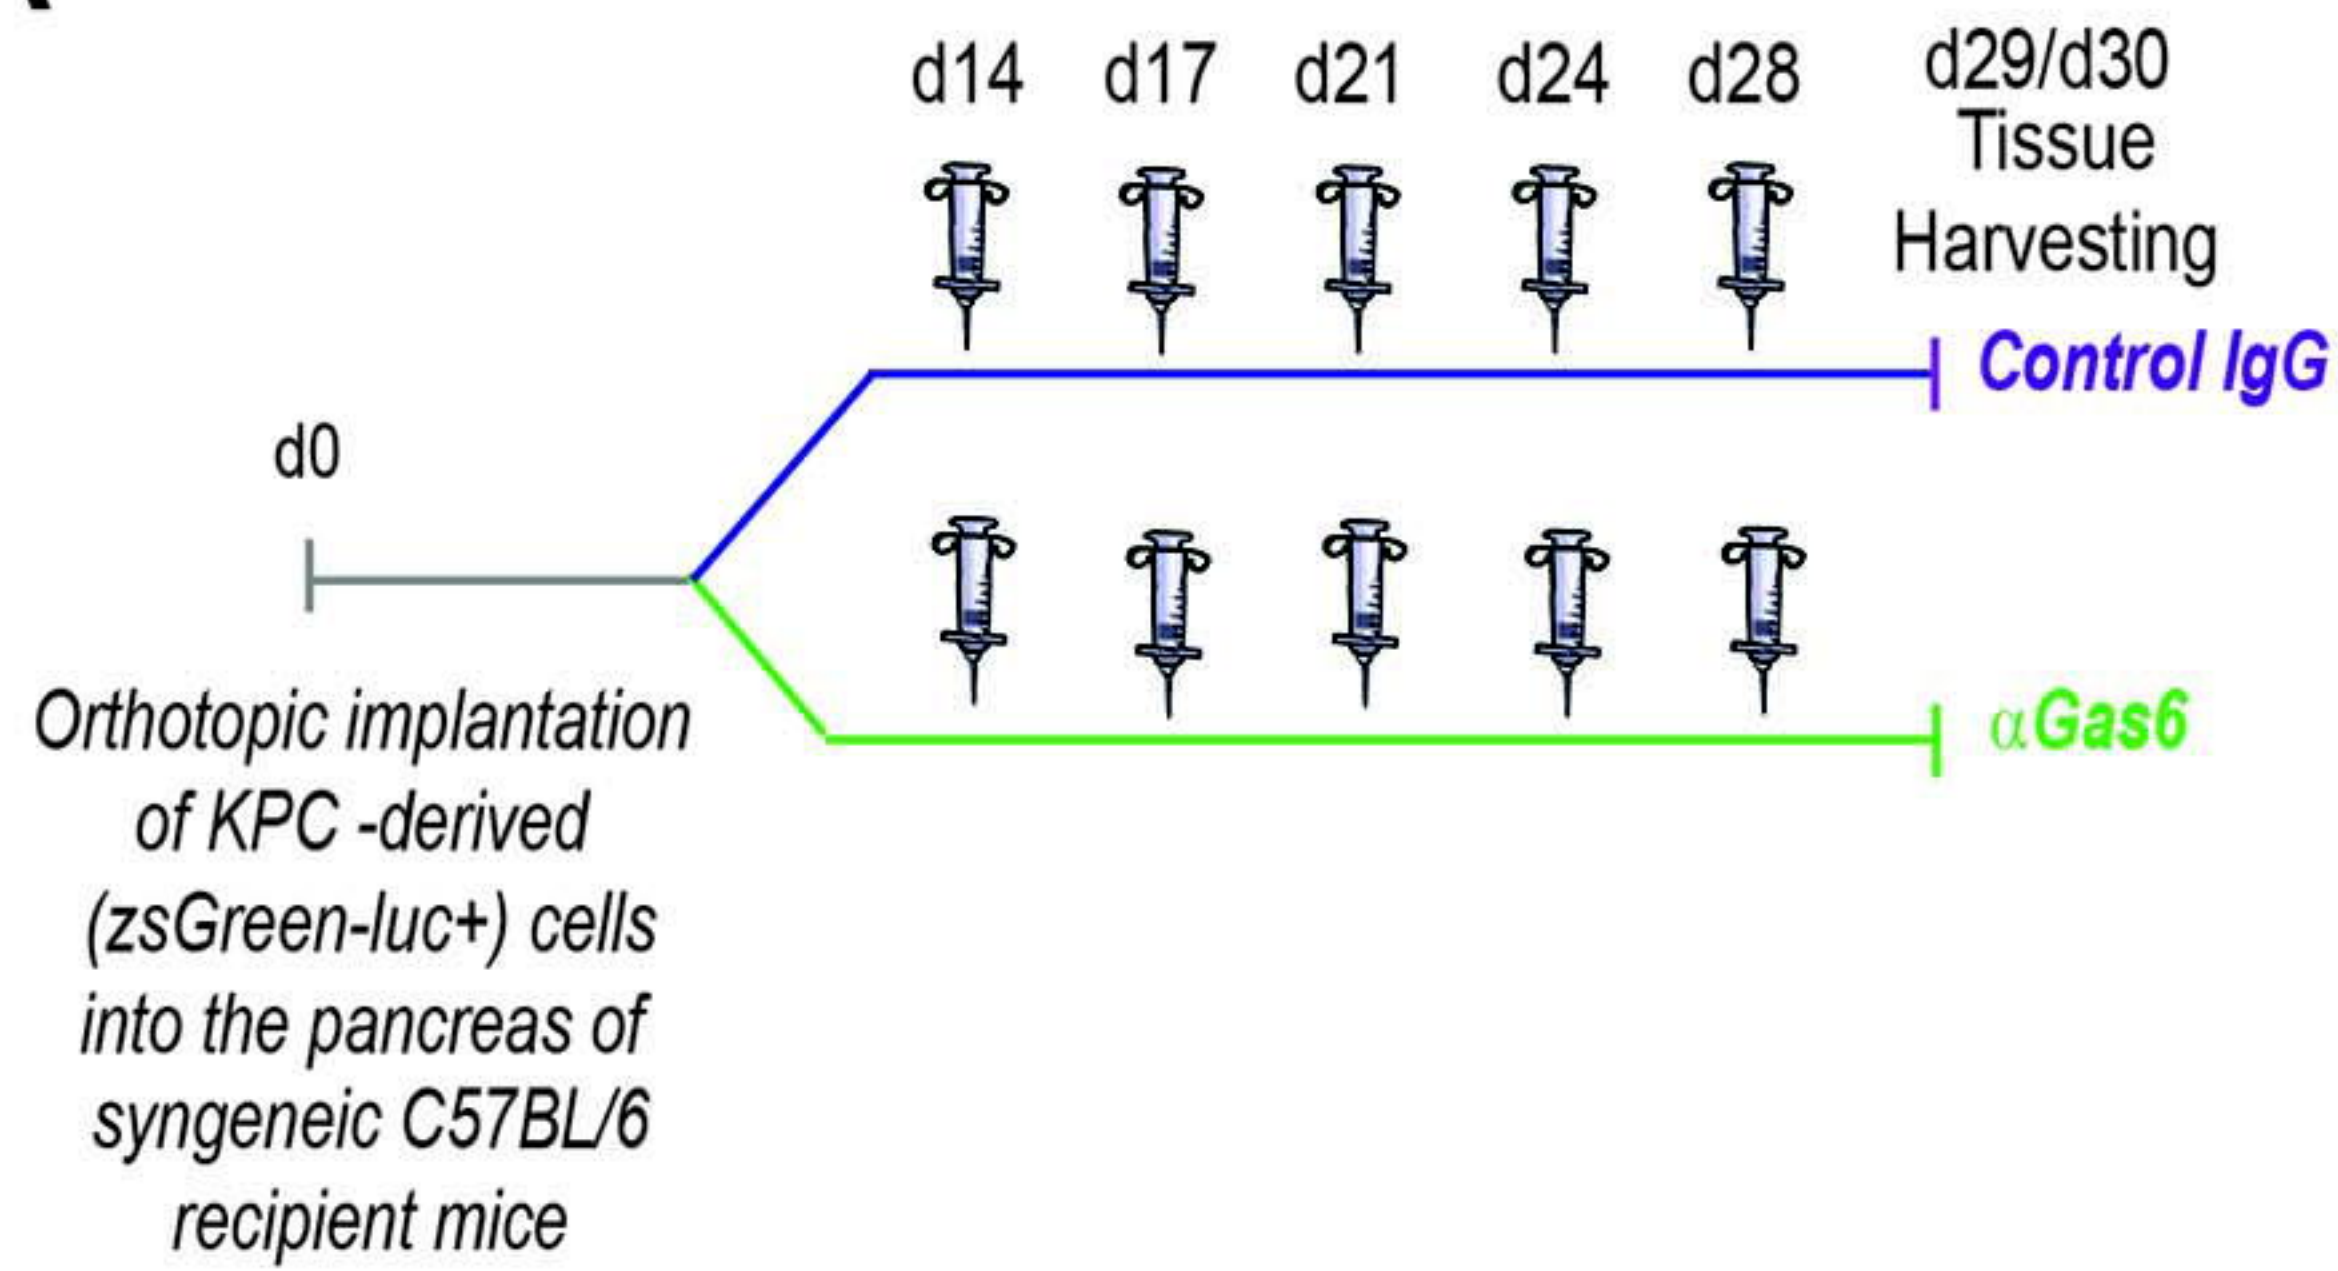**B**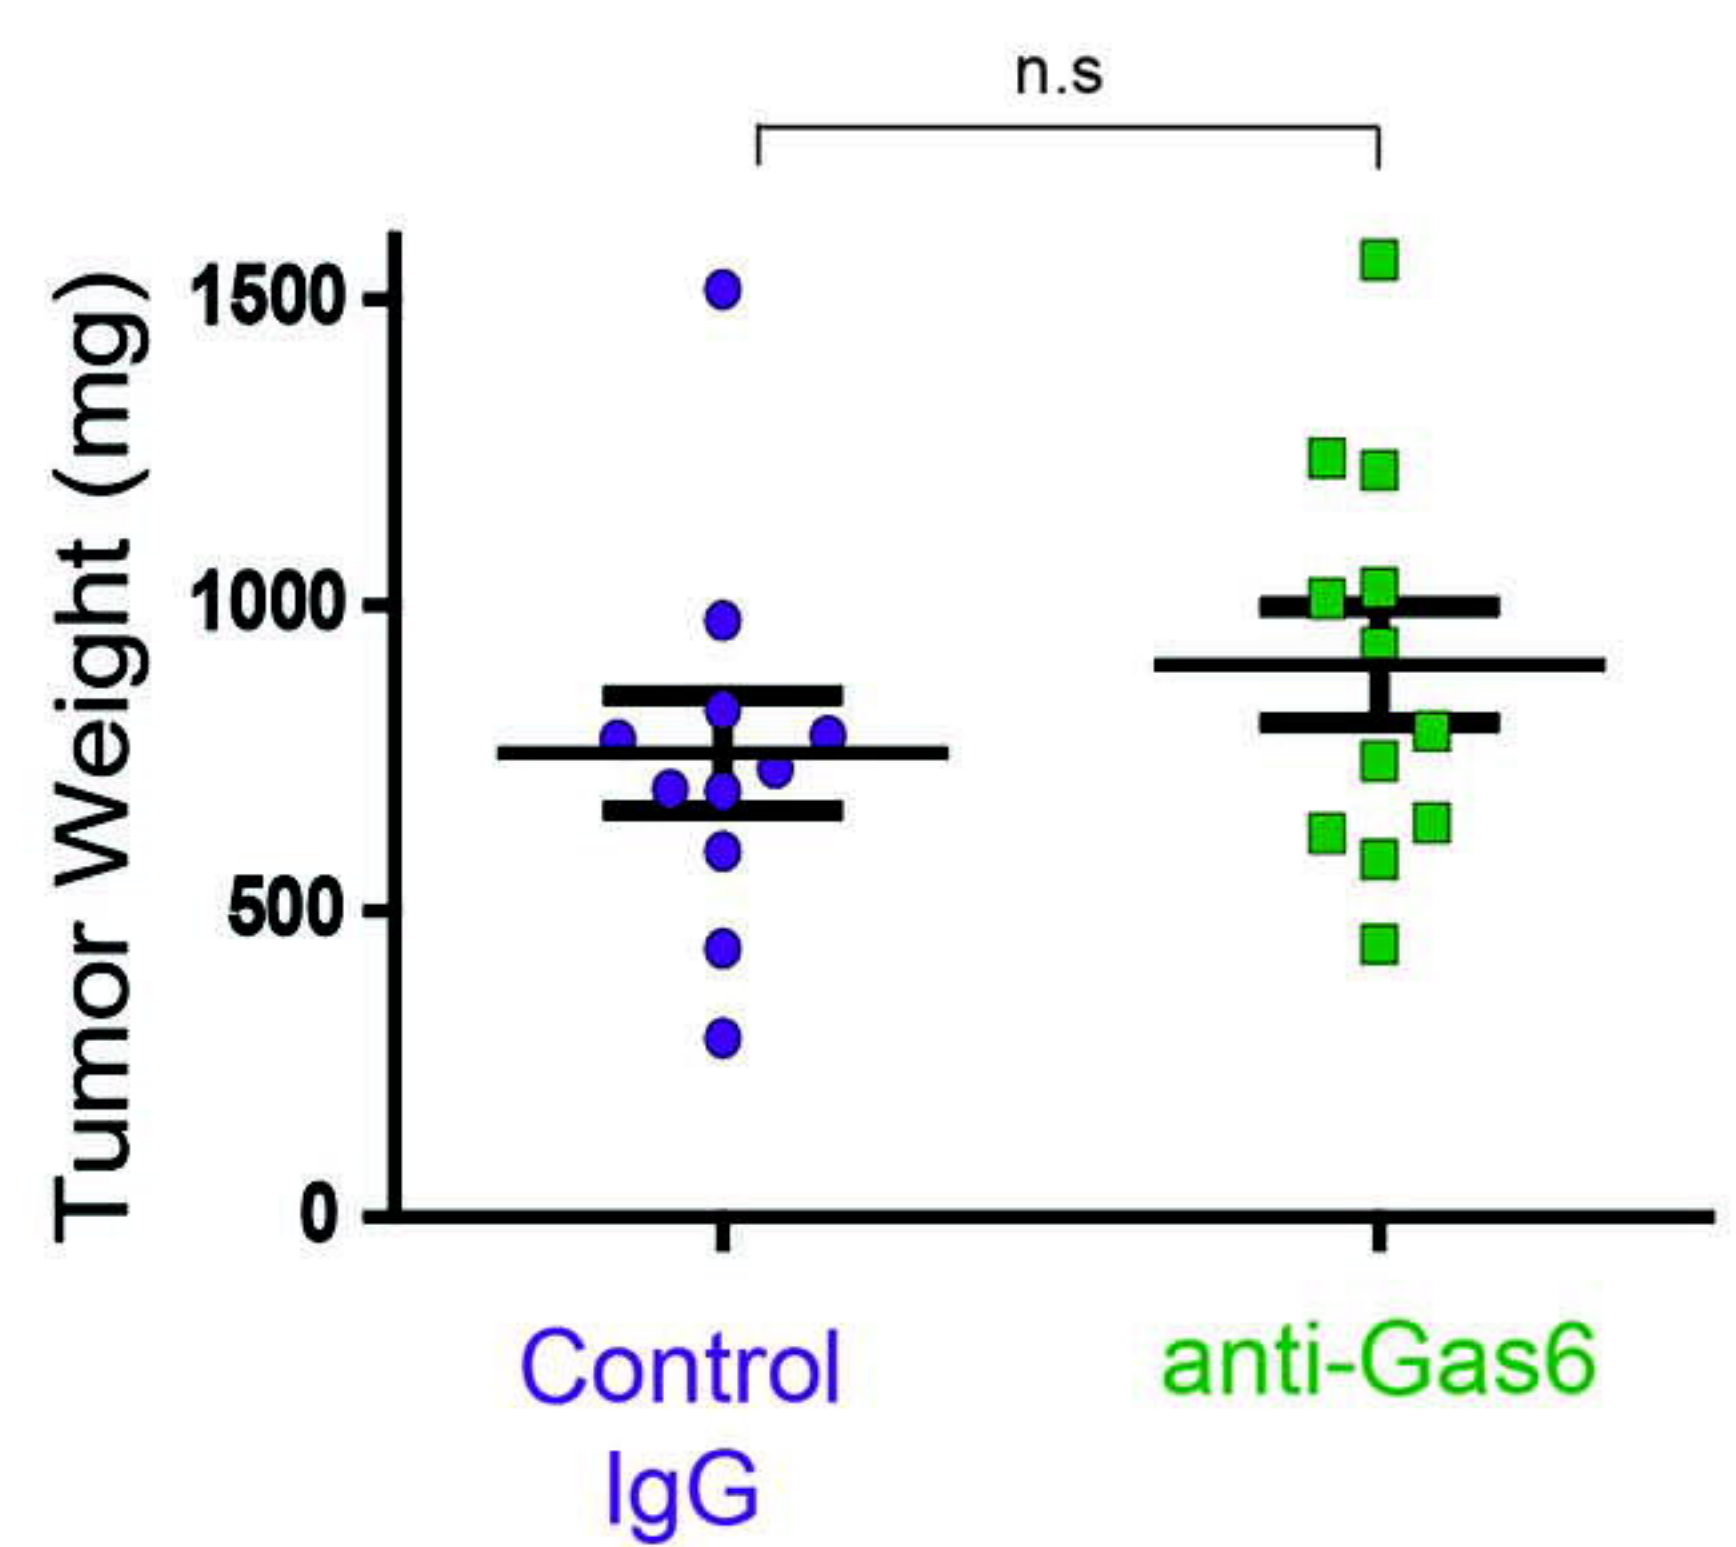**C**

Metastatic lungs

Naive lungs

Control IgG

anti-Gas6

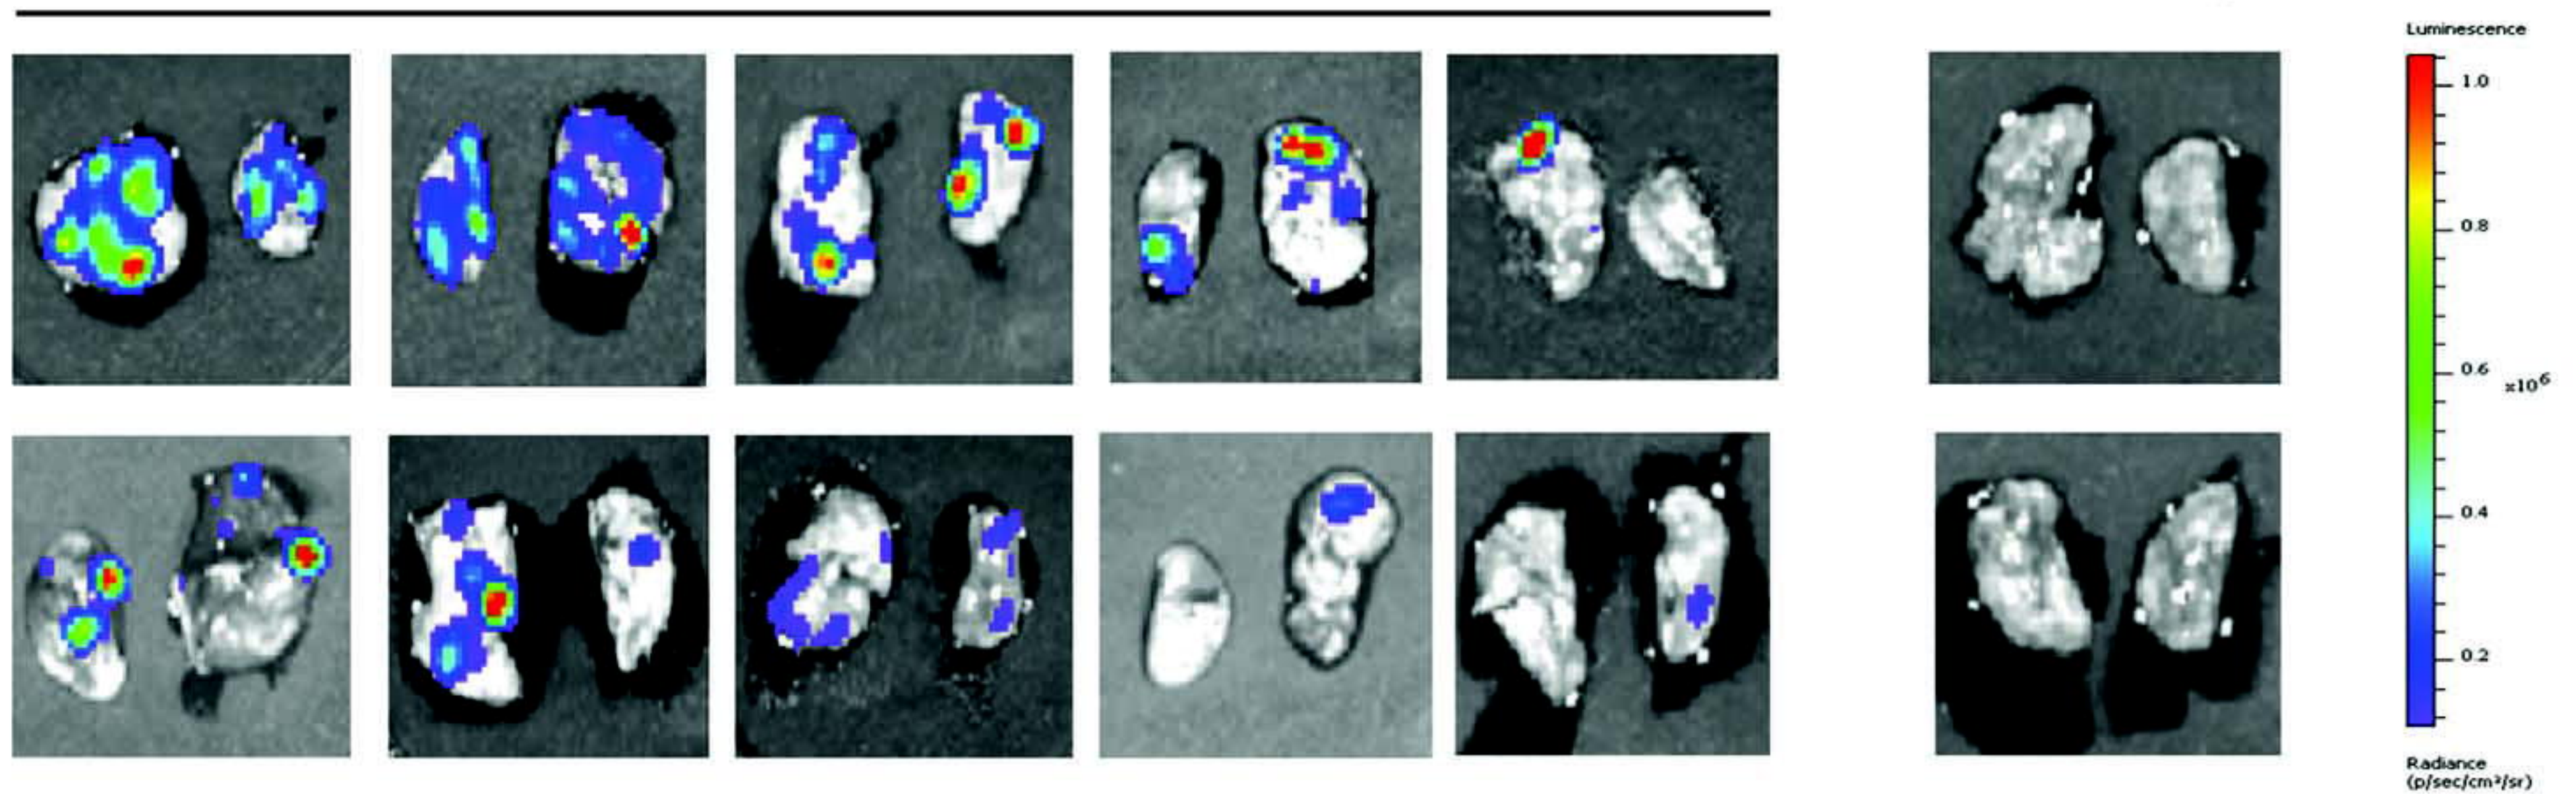**D**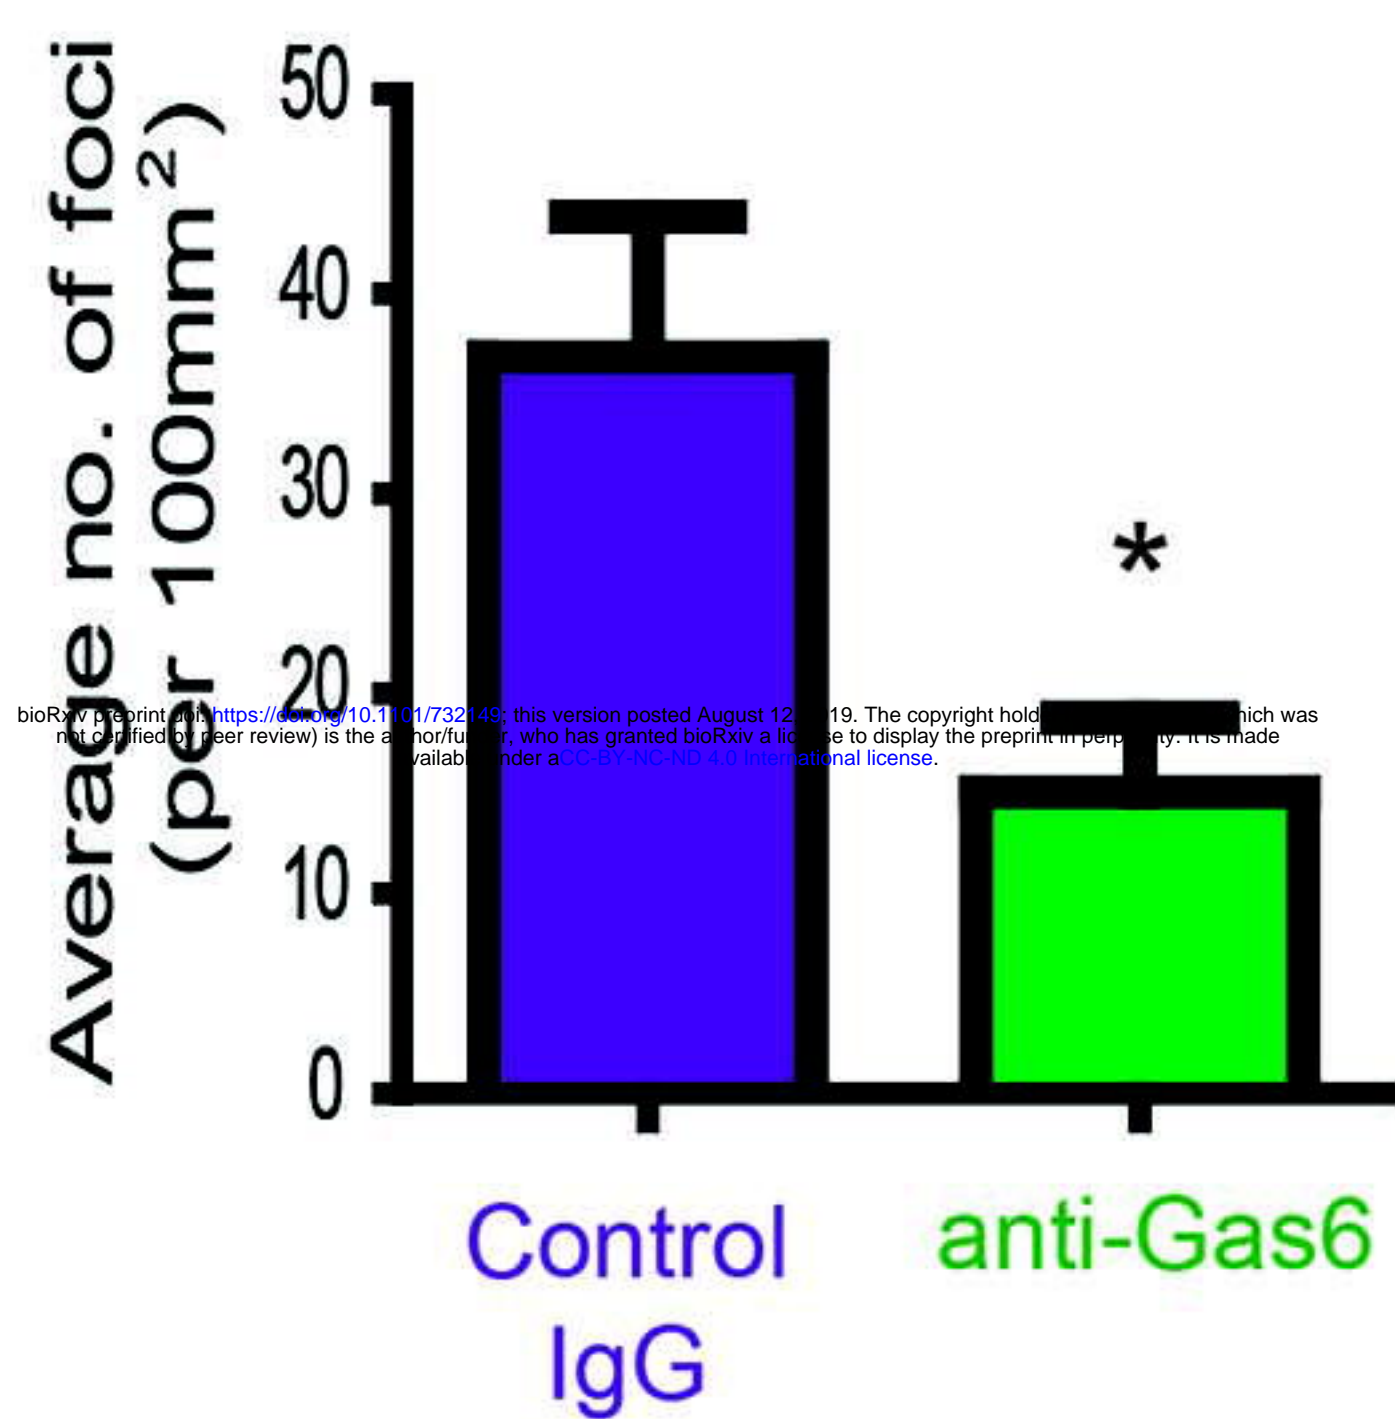**E**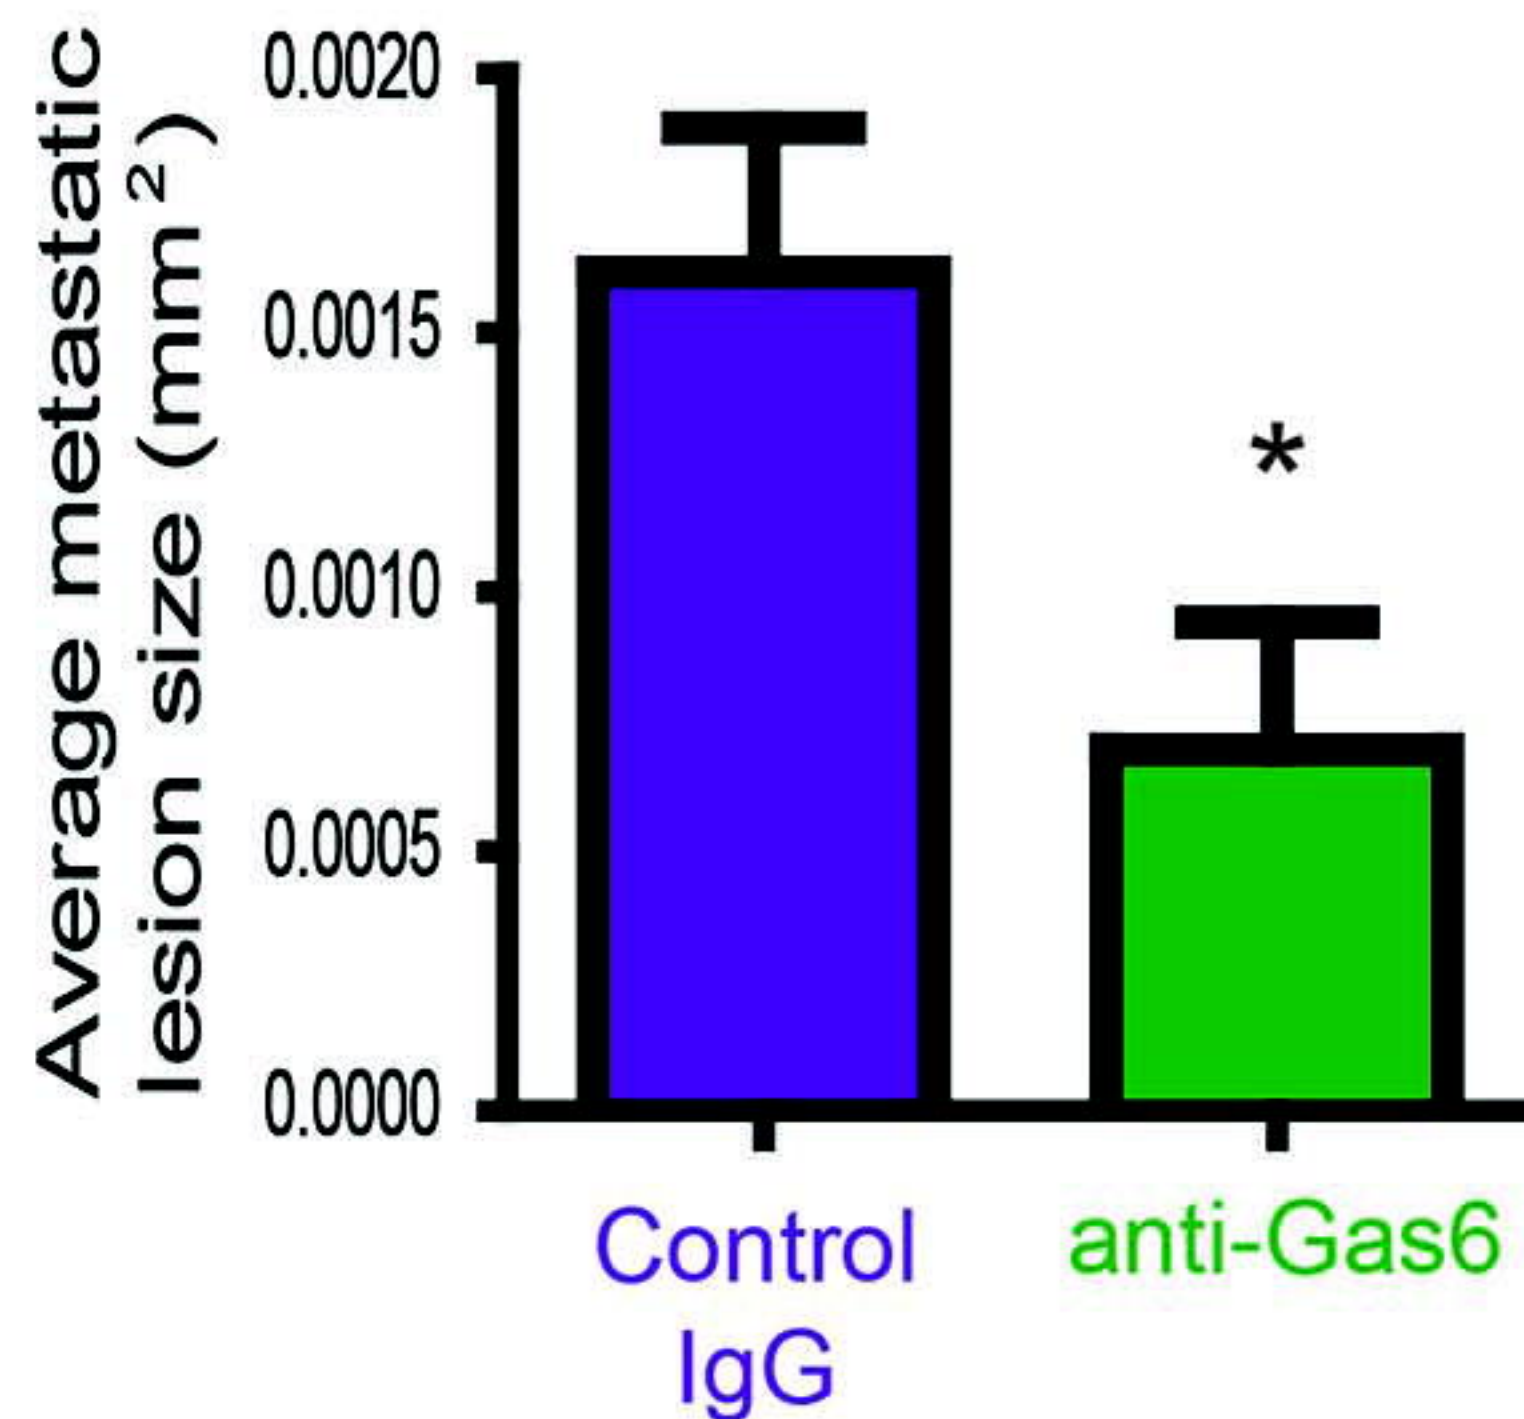**F**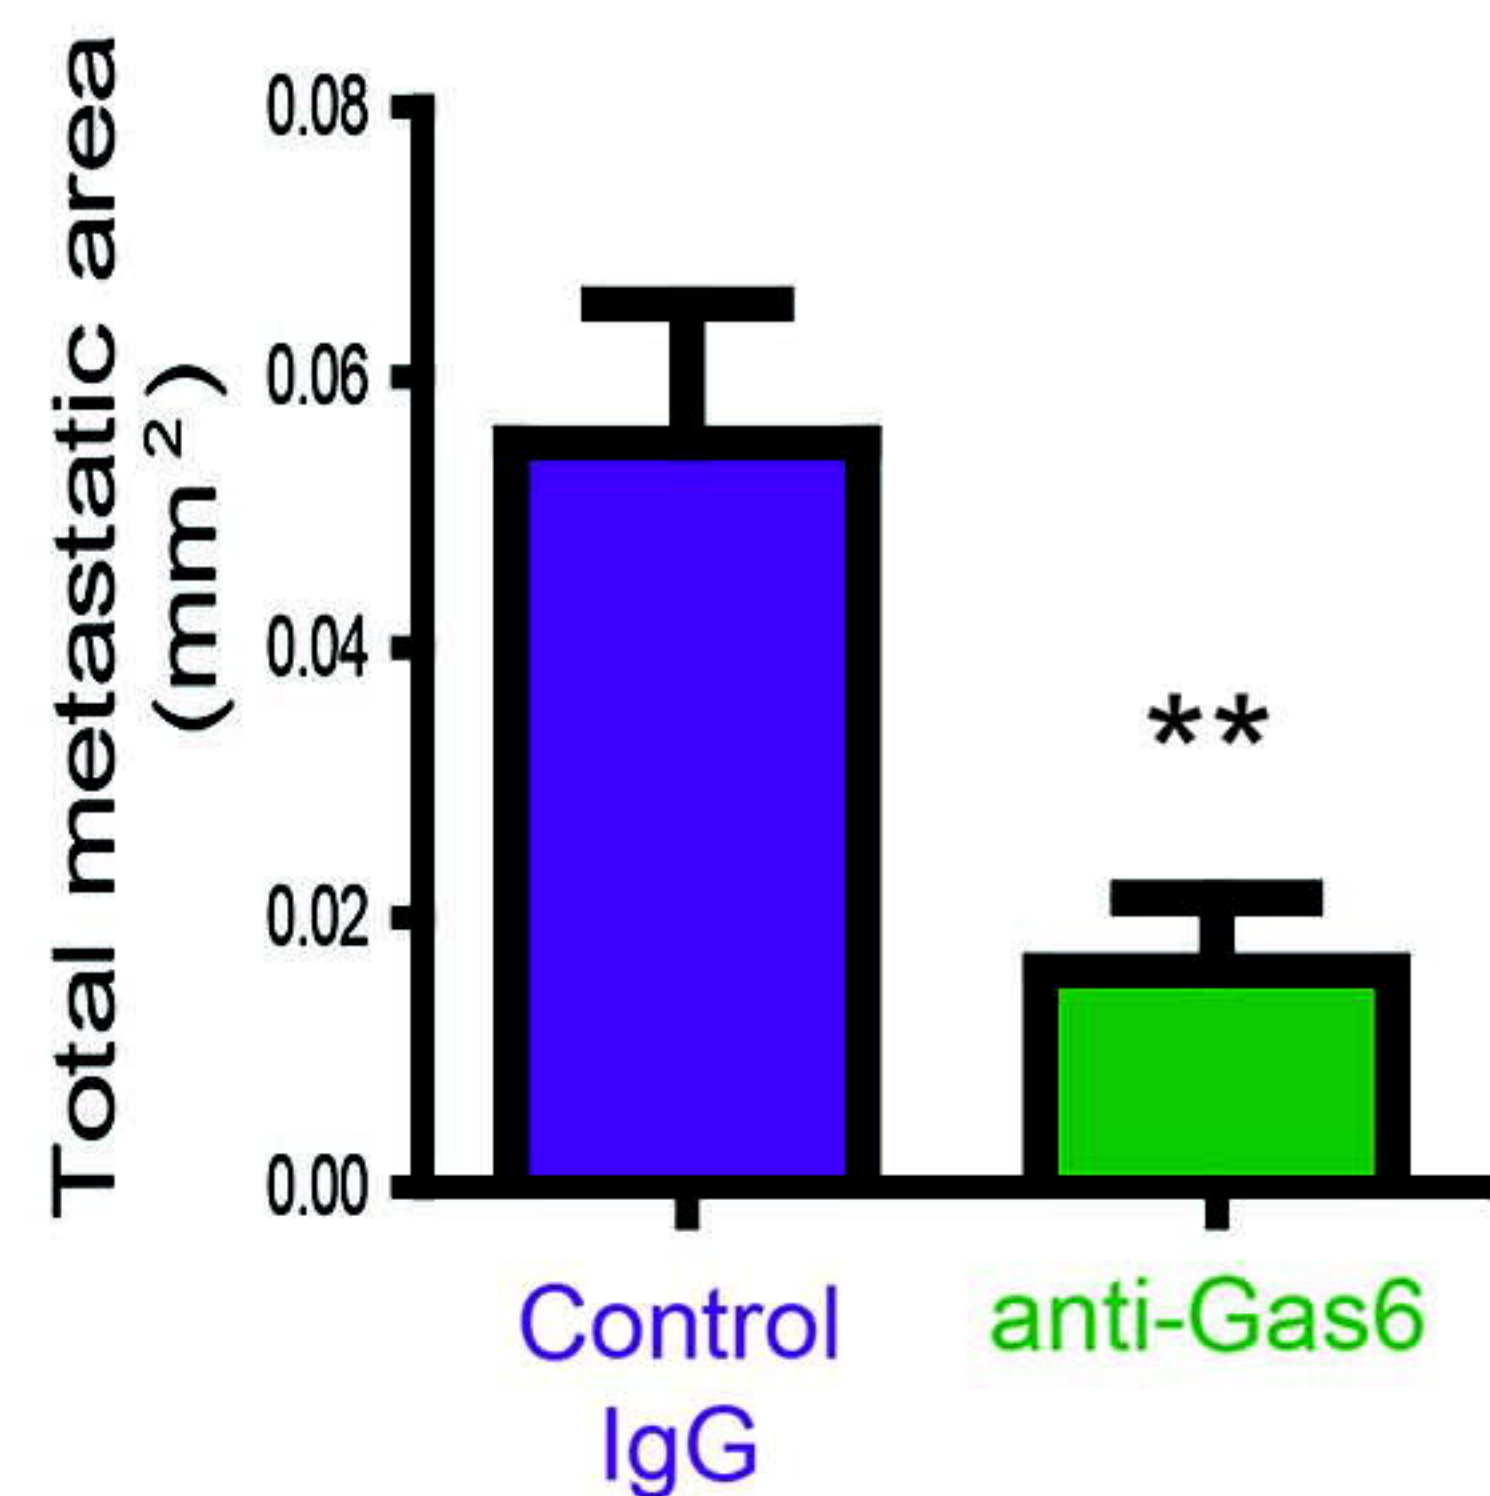**G**

Control IgG

anti-Gas6

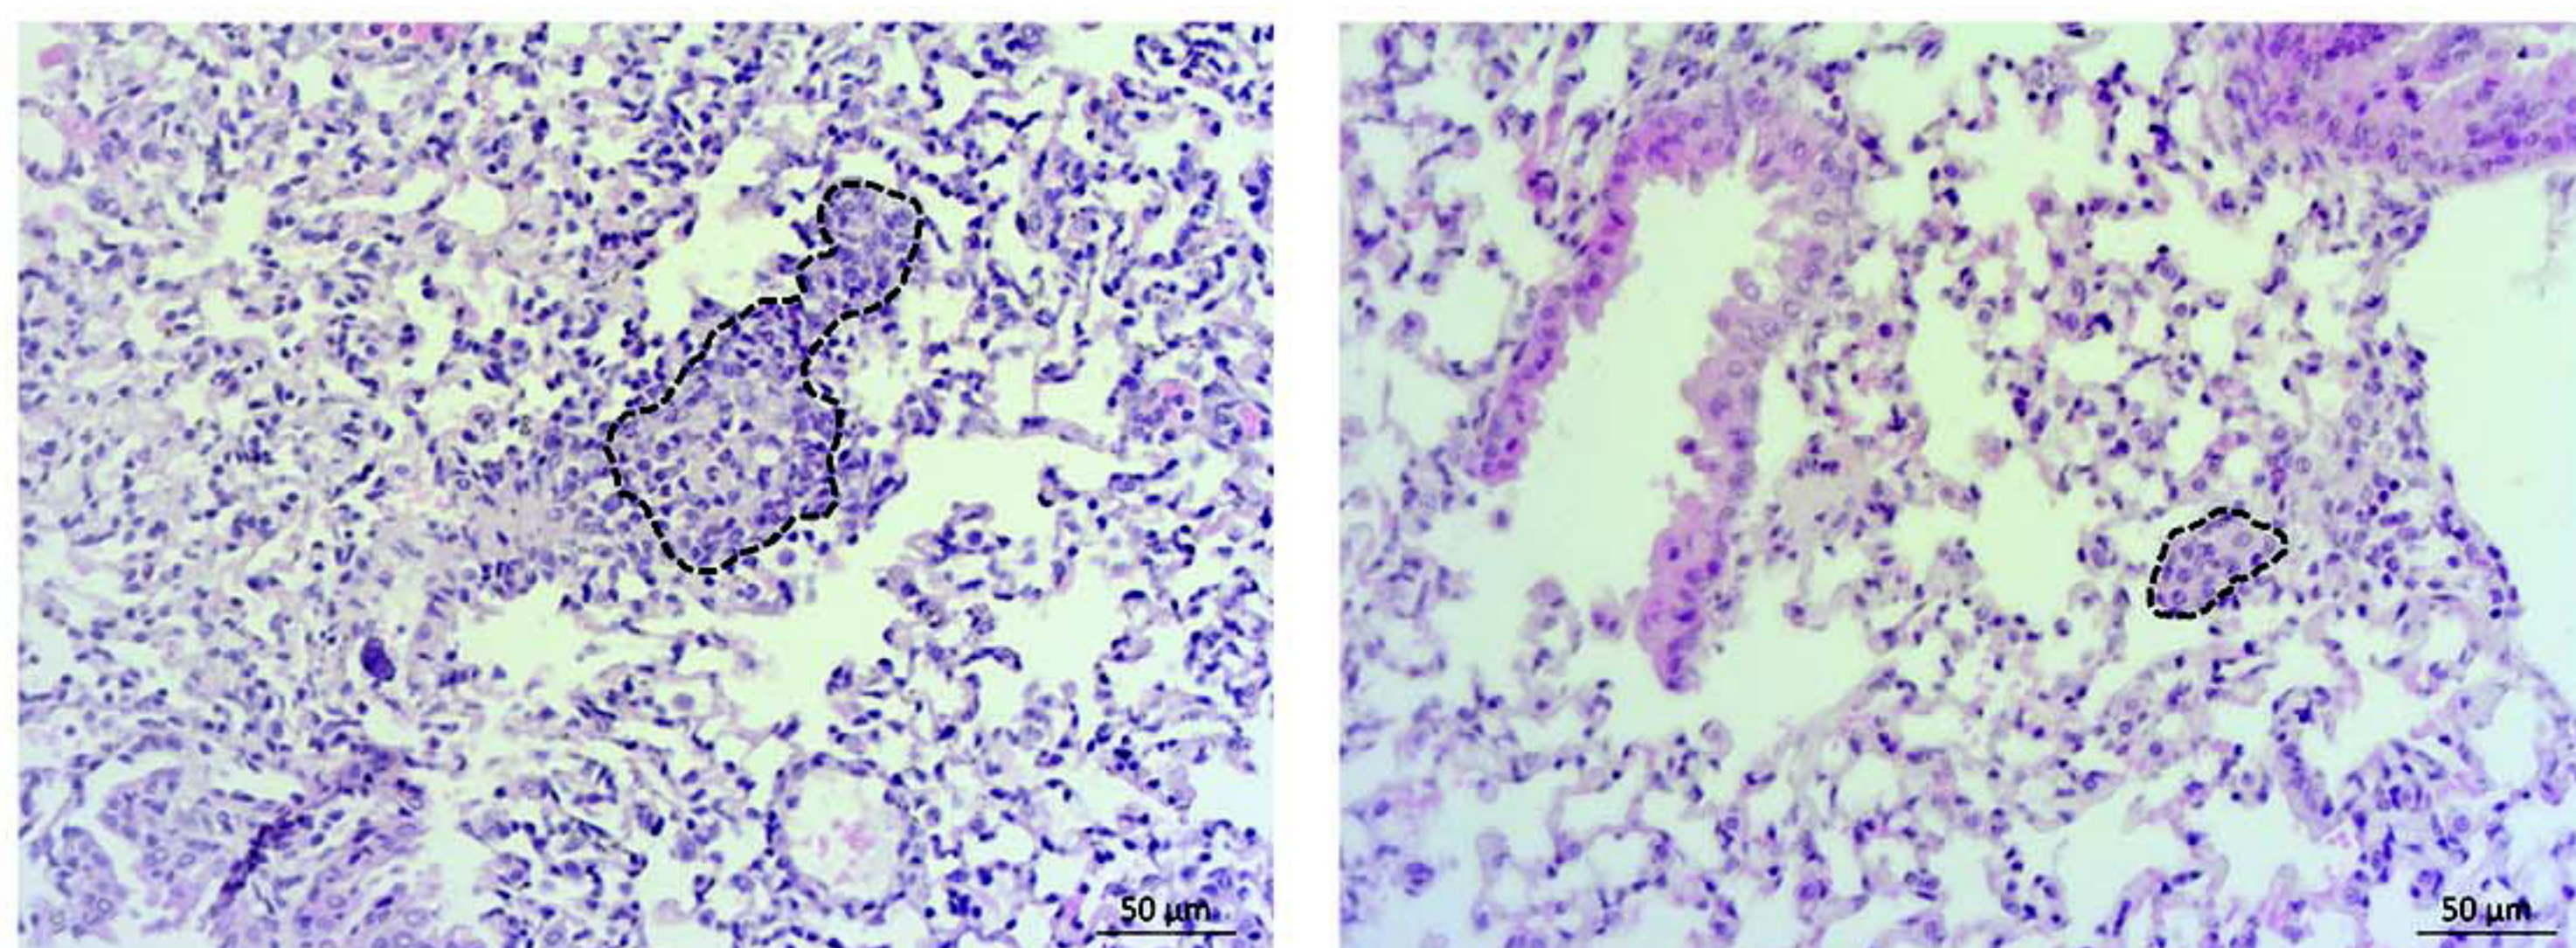

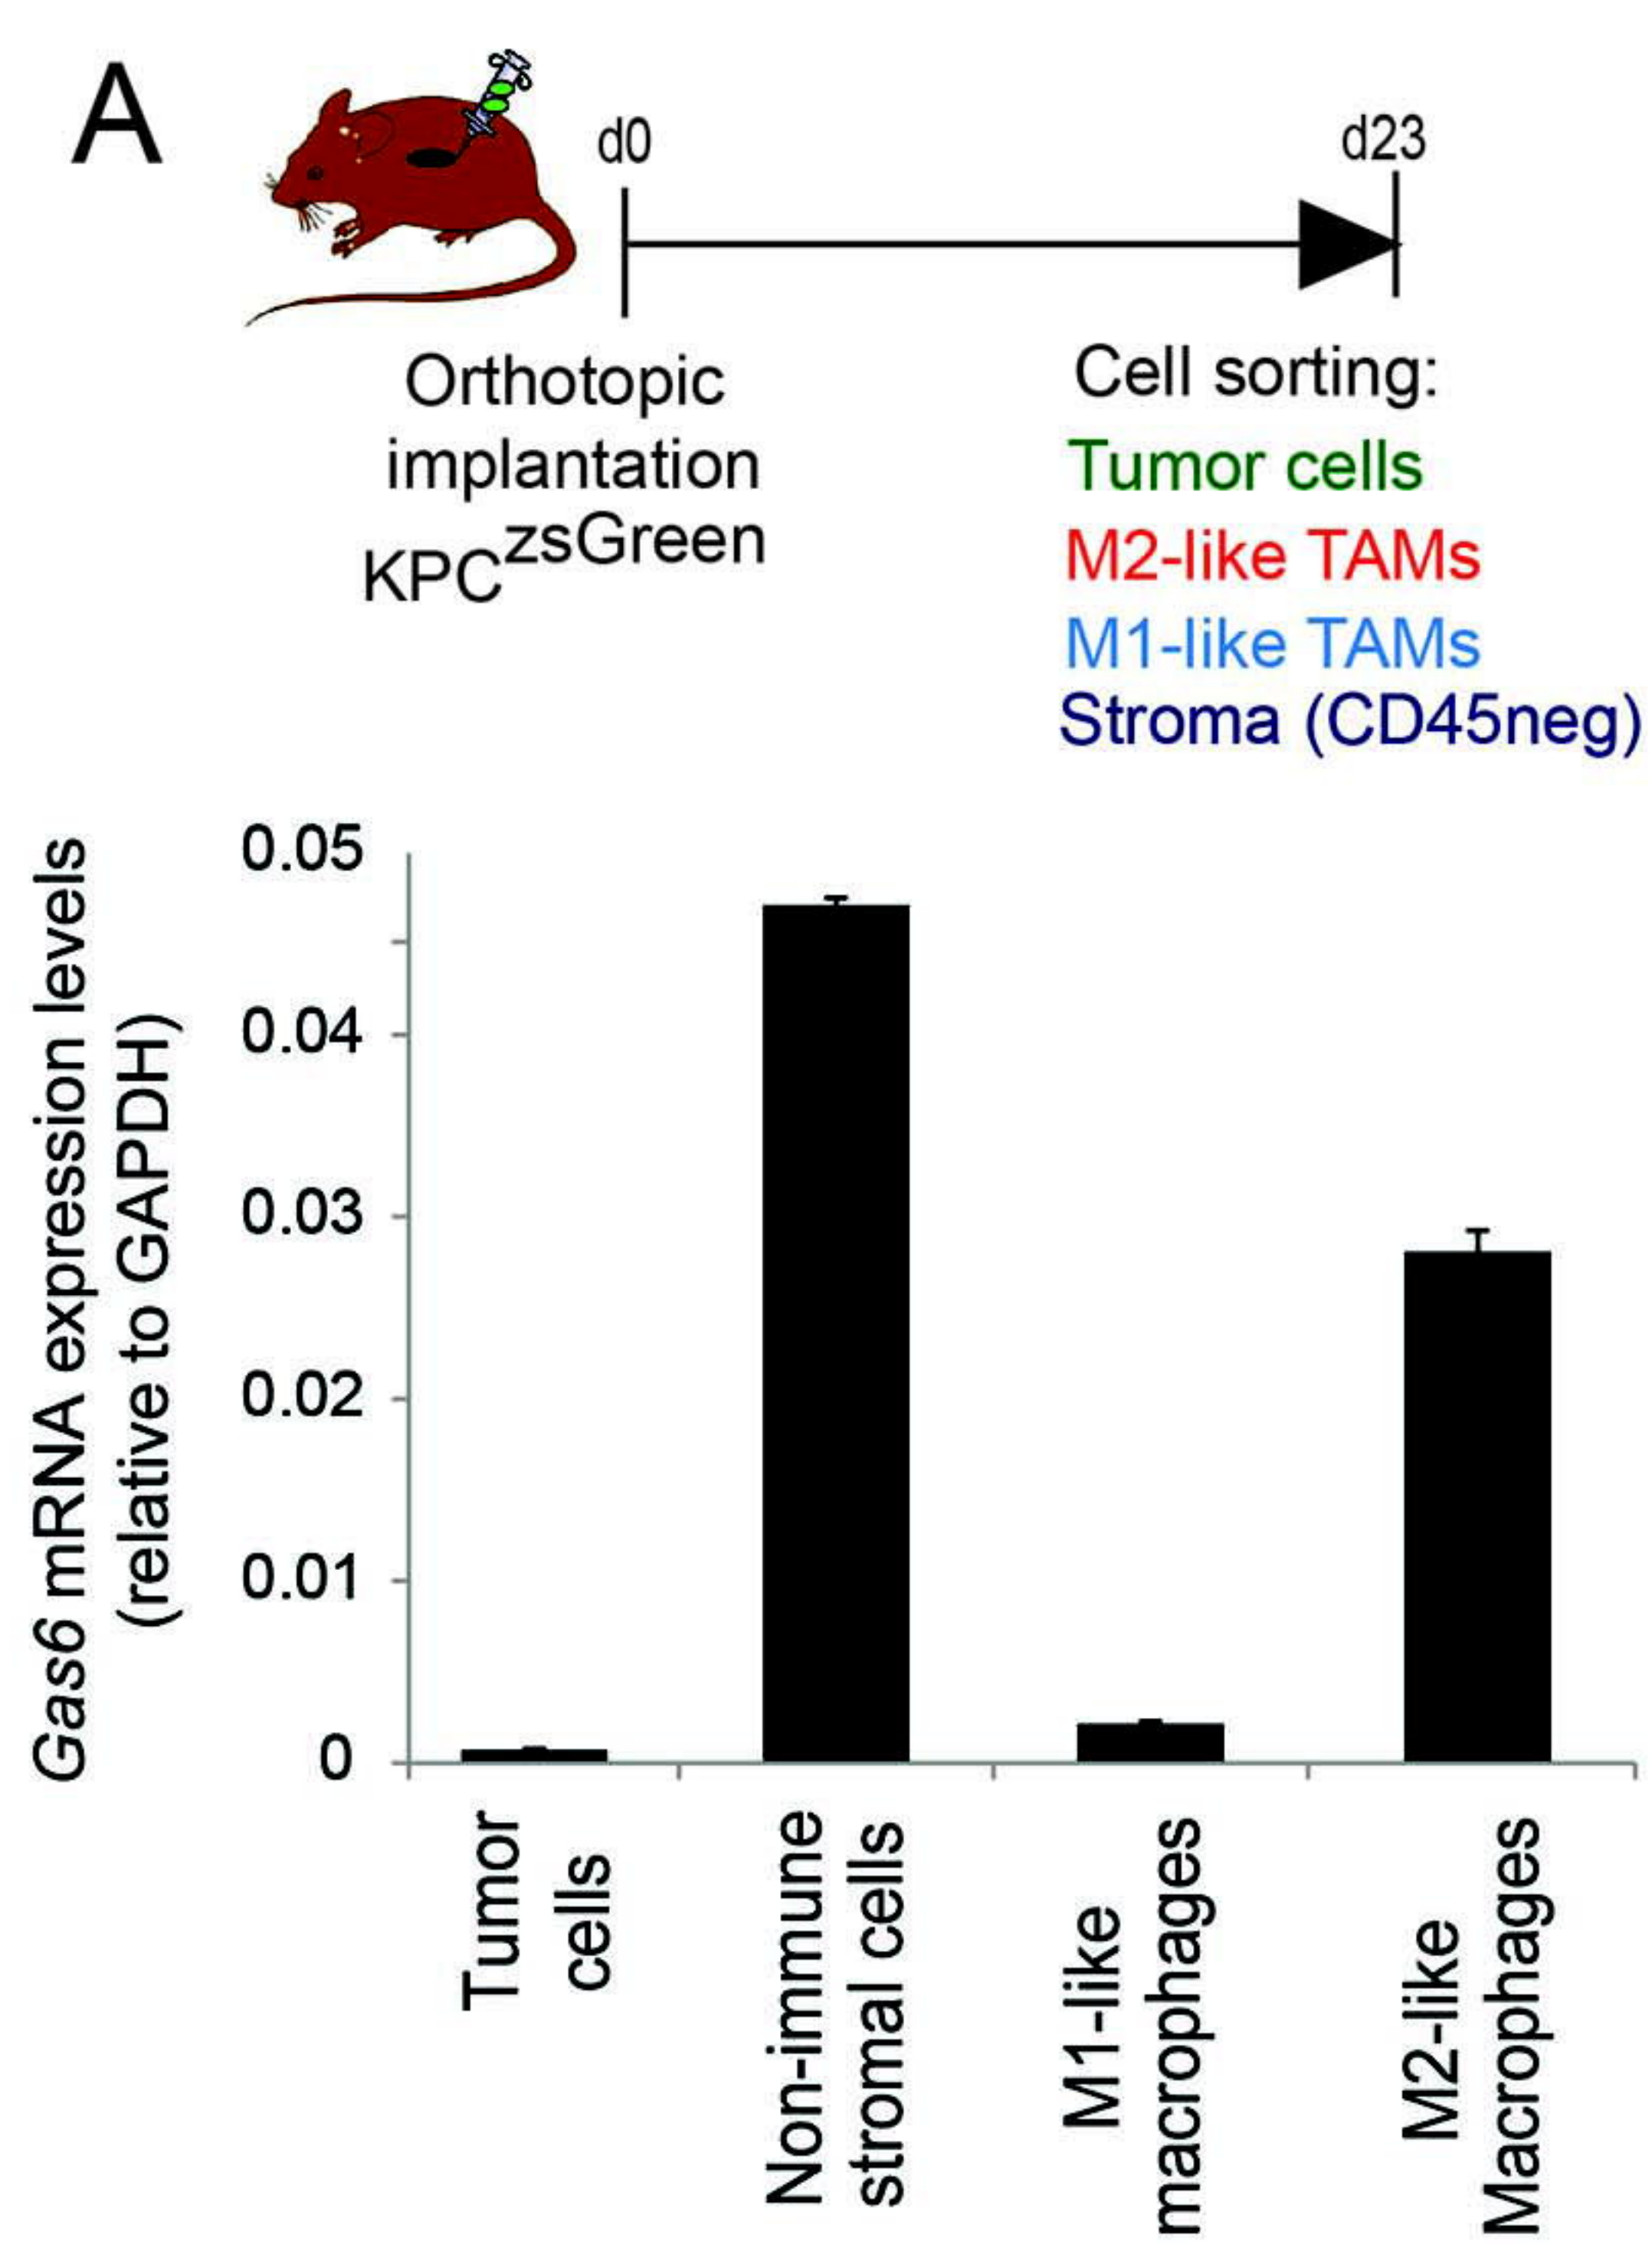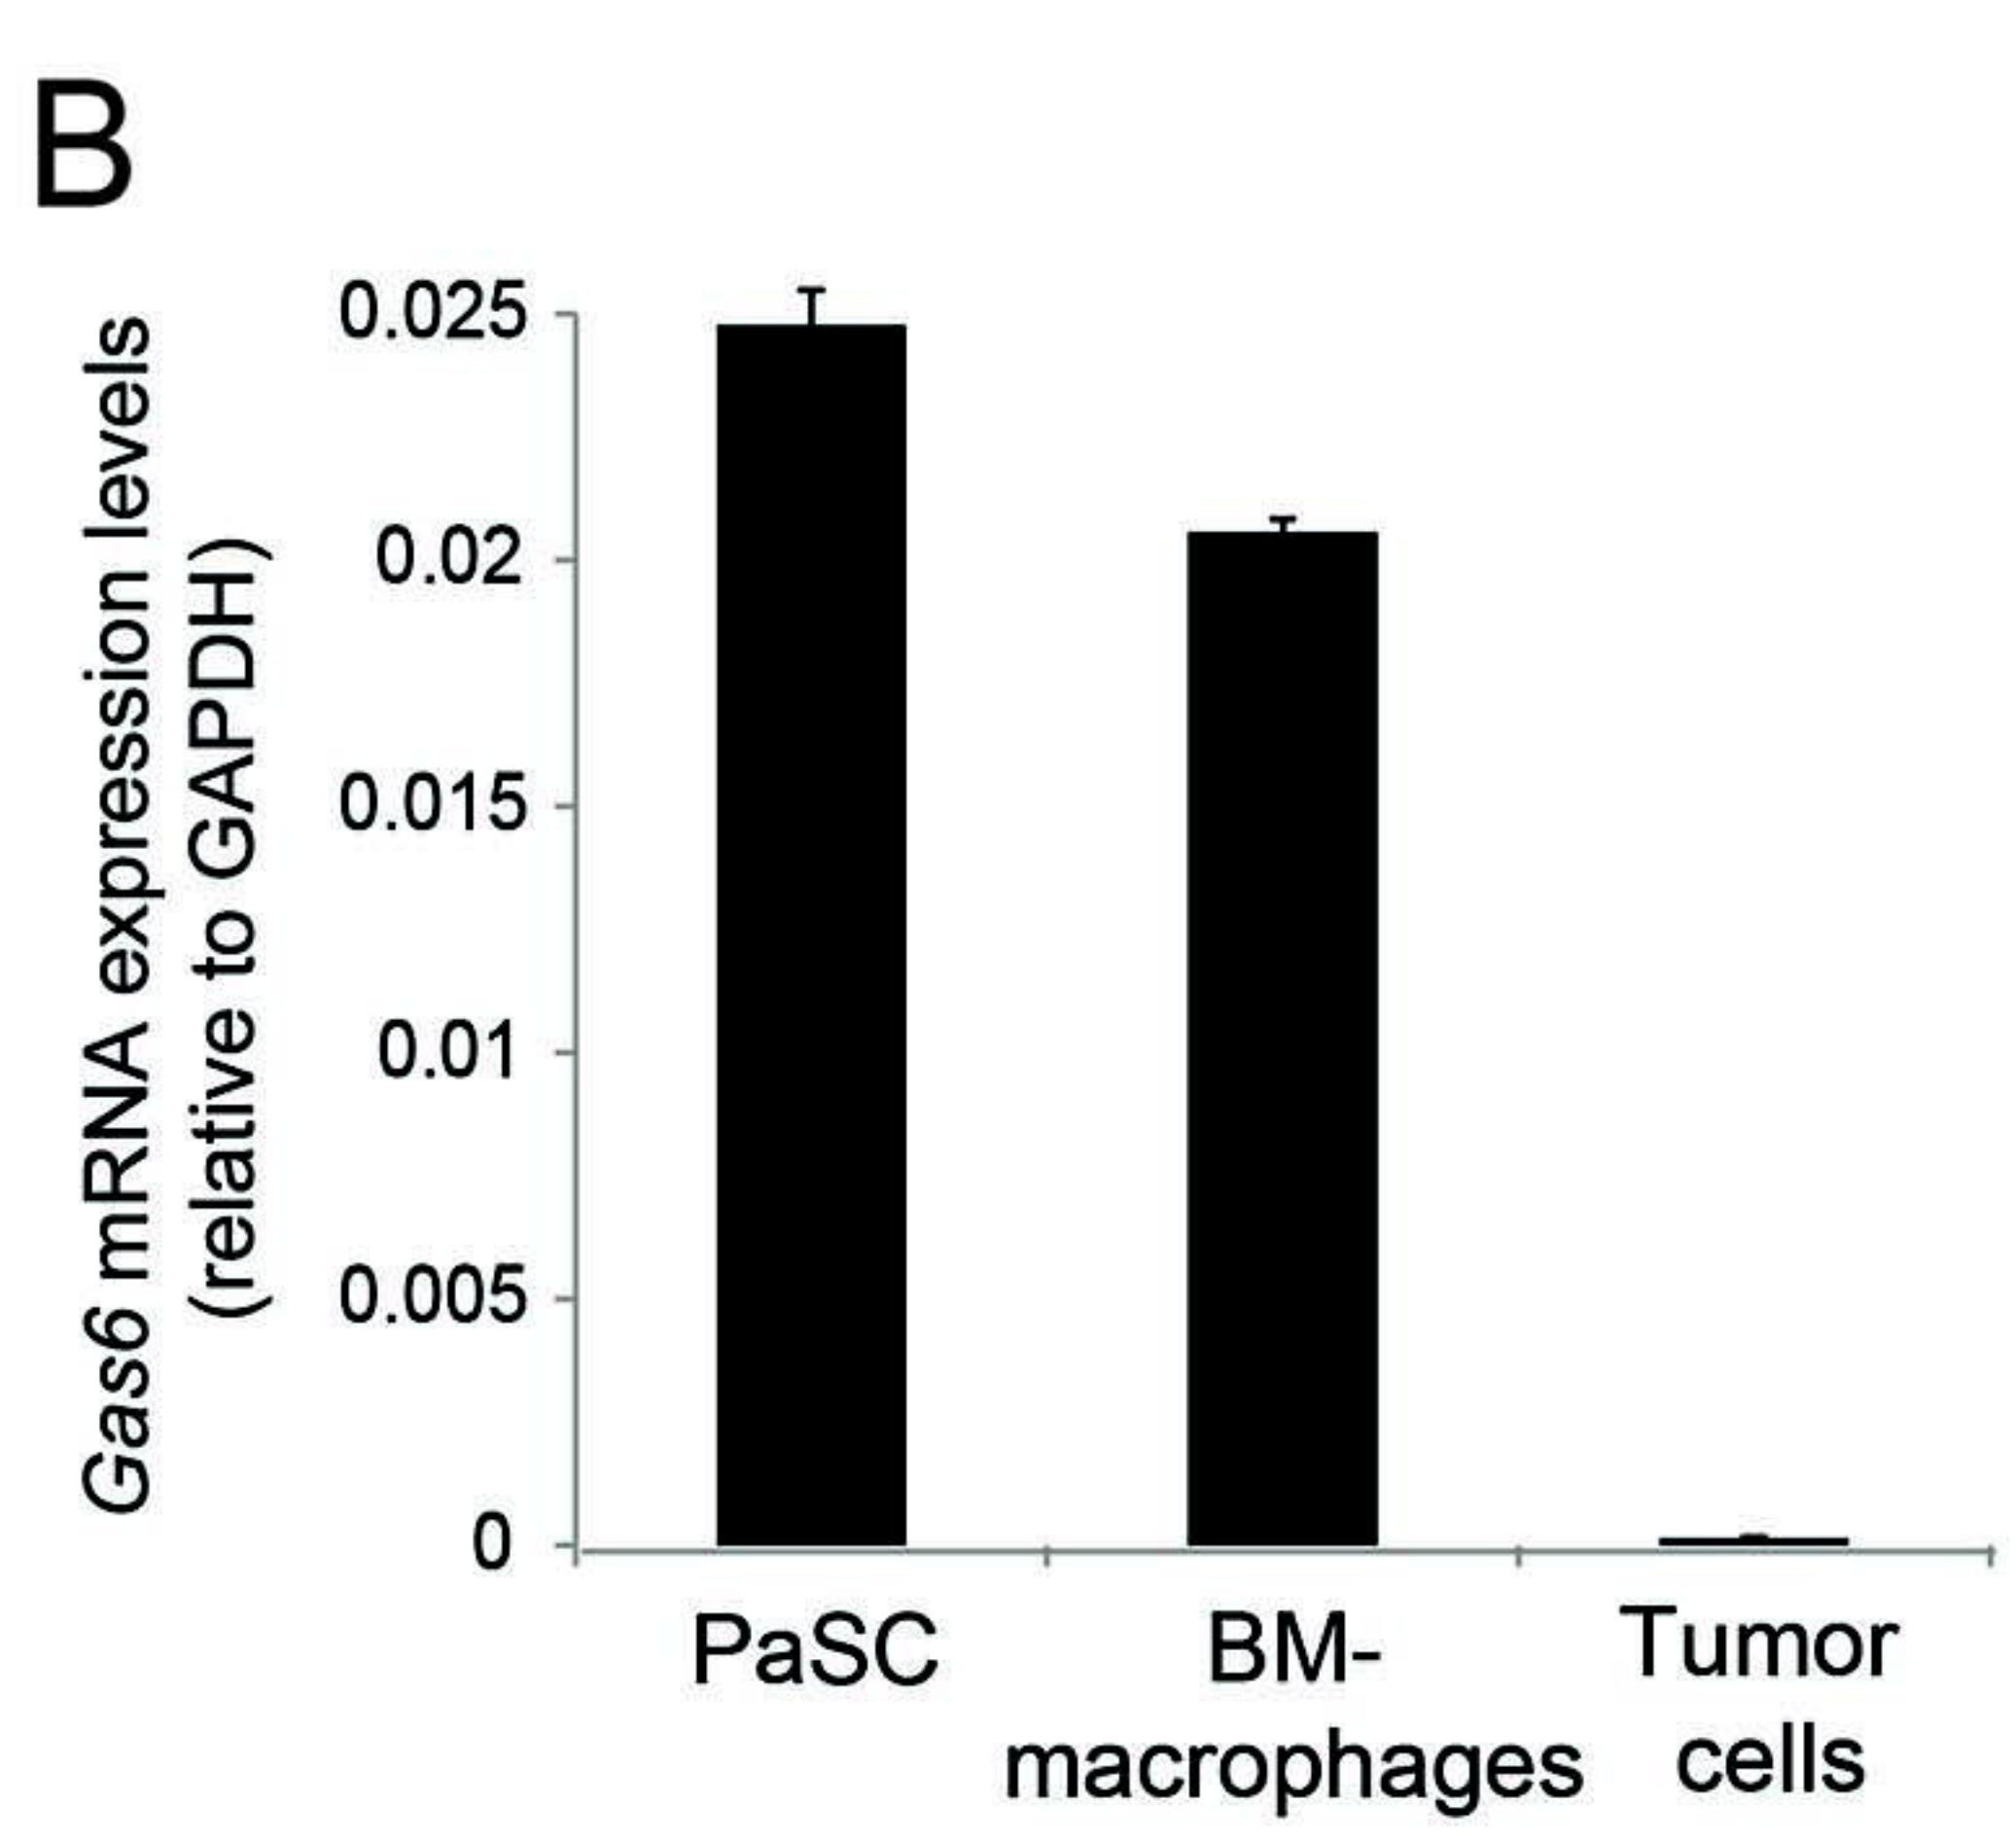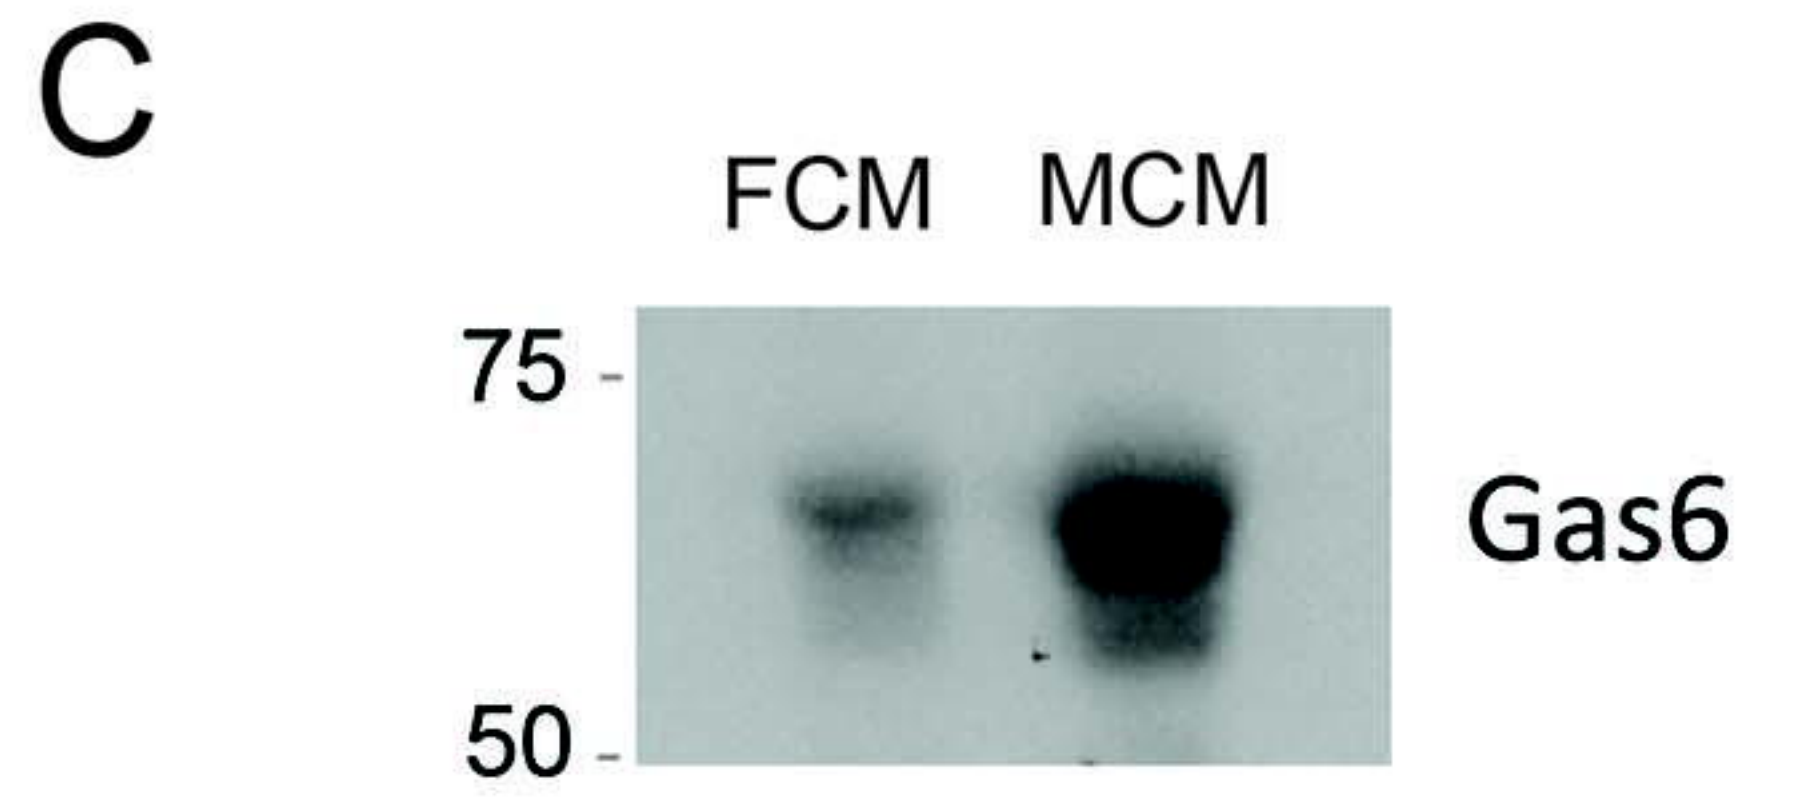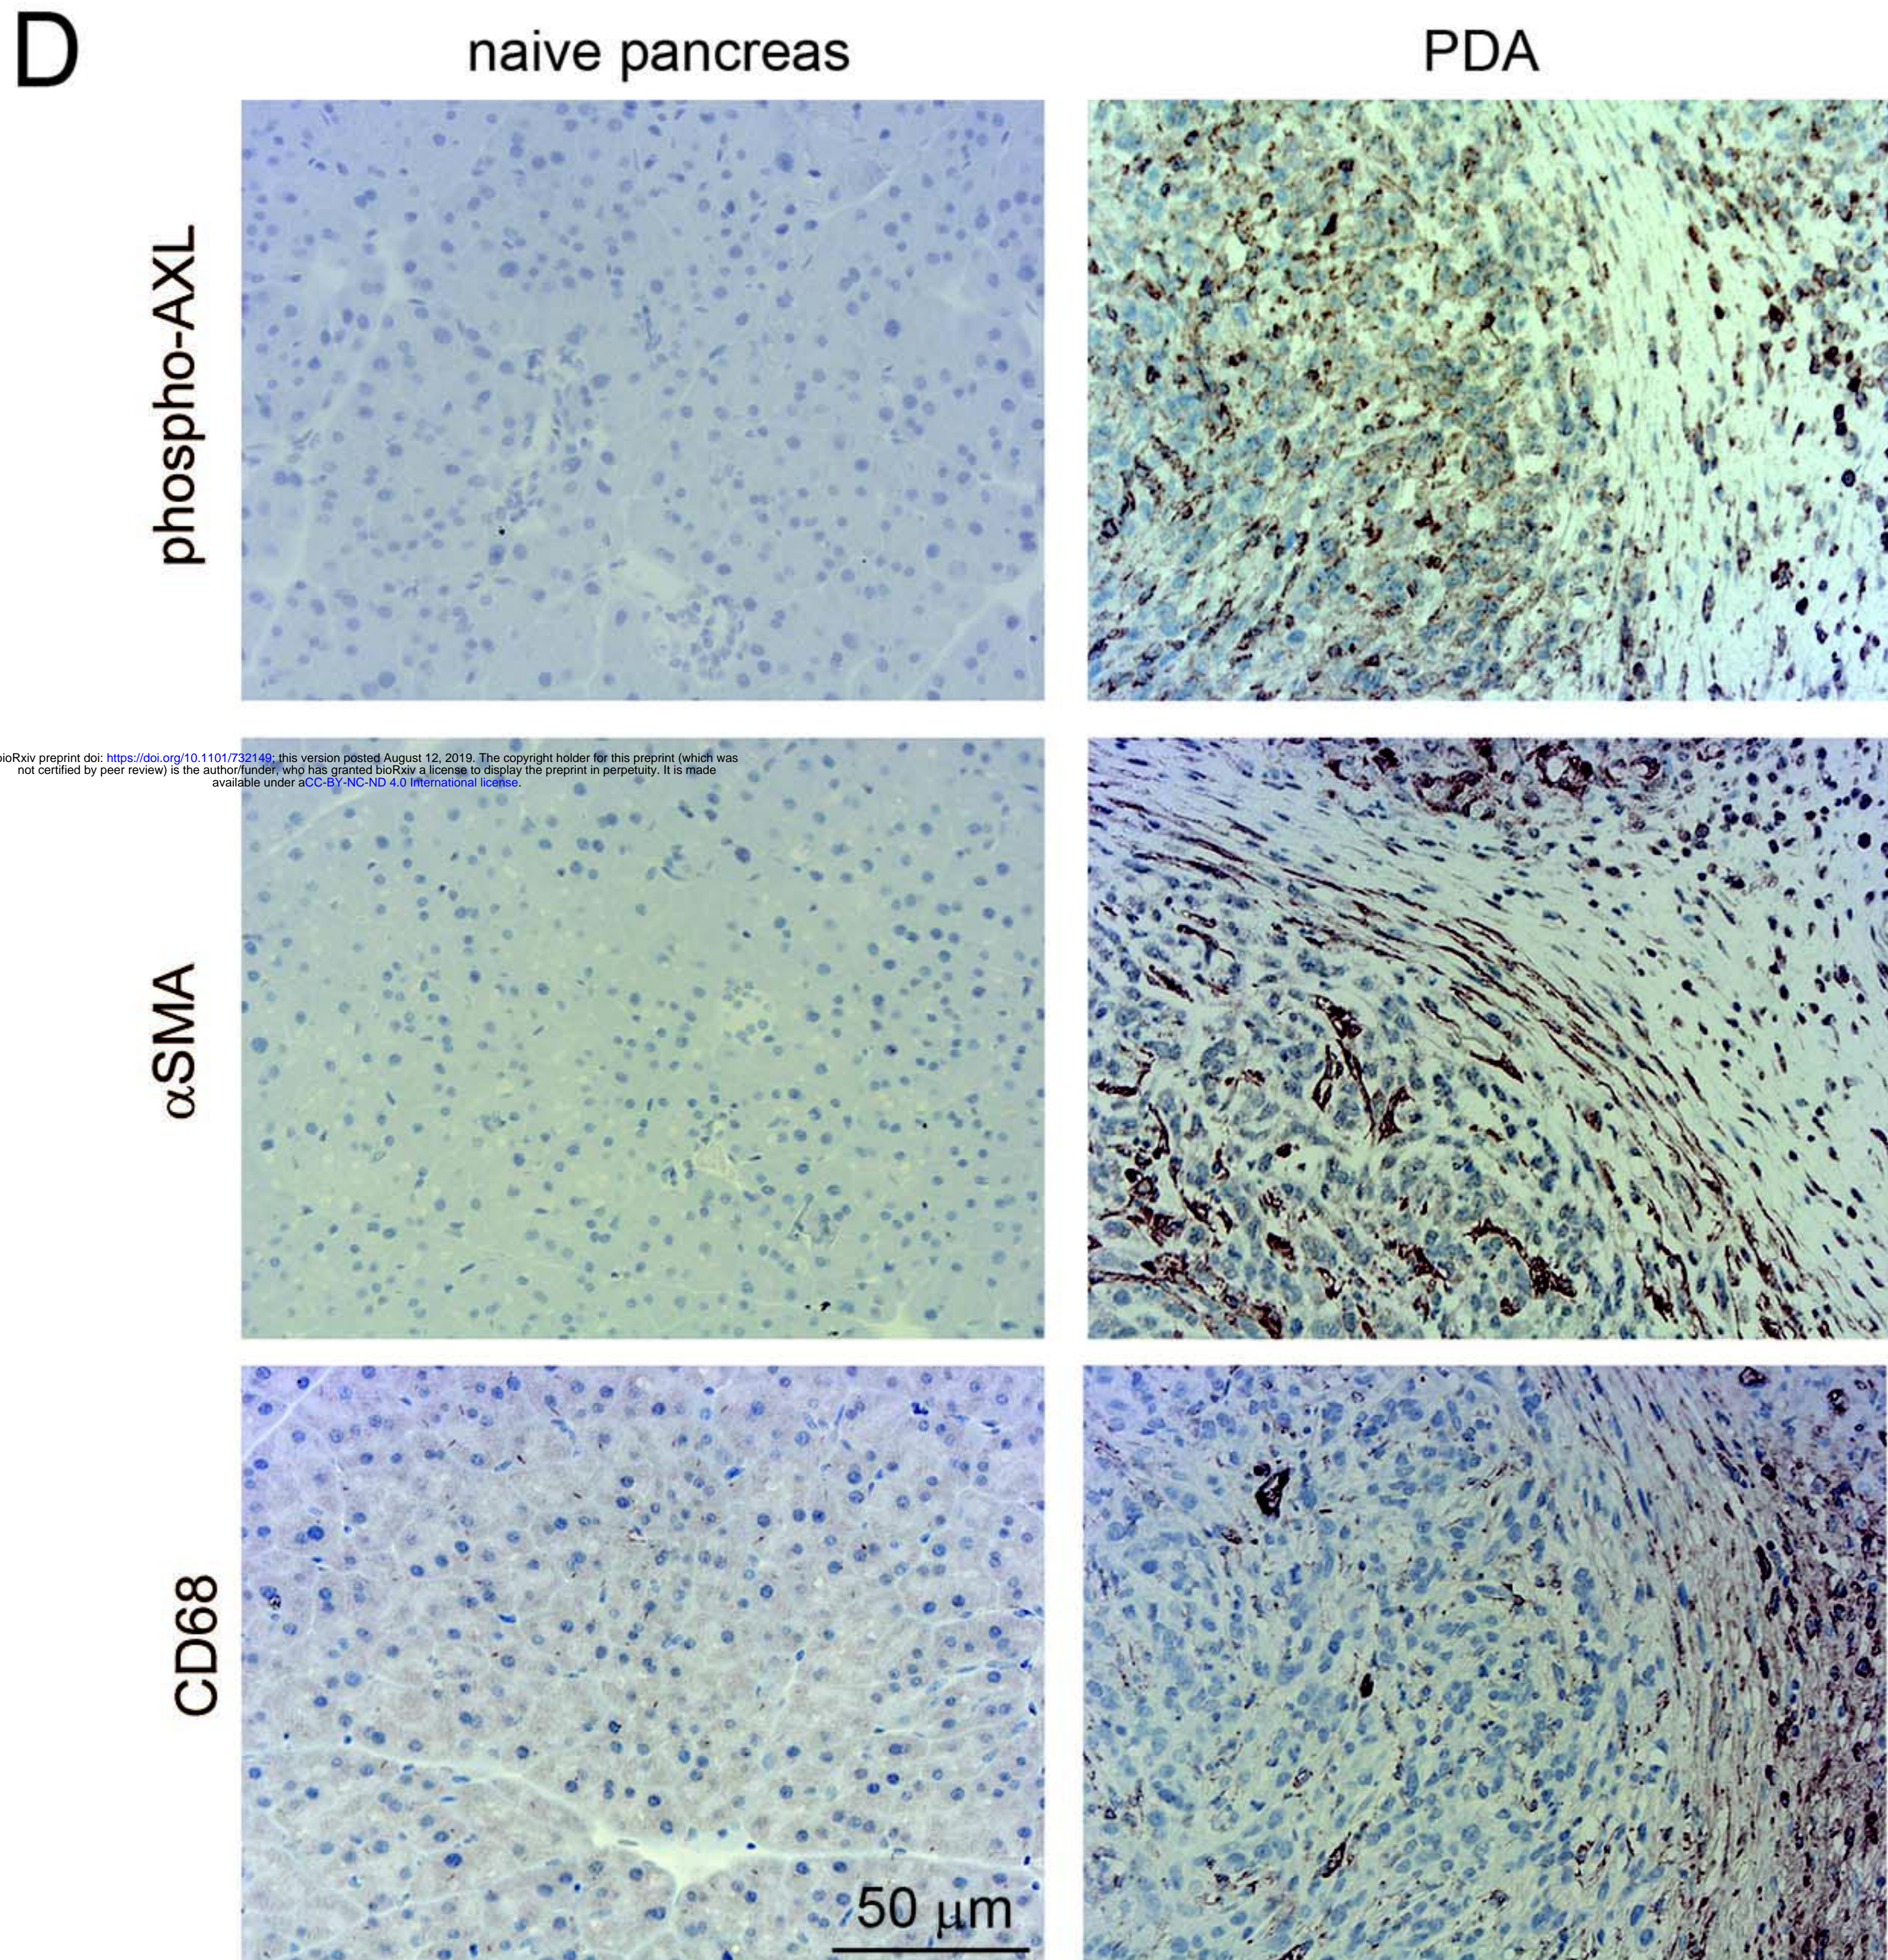

# Human PDA tumors

## A

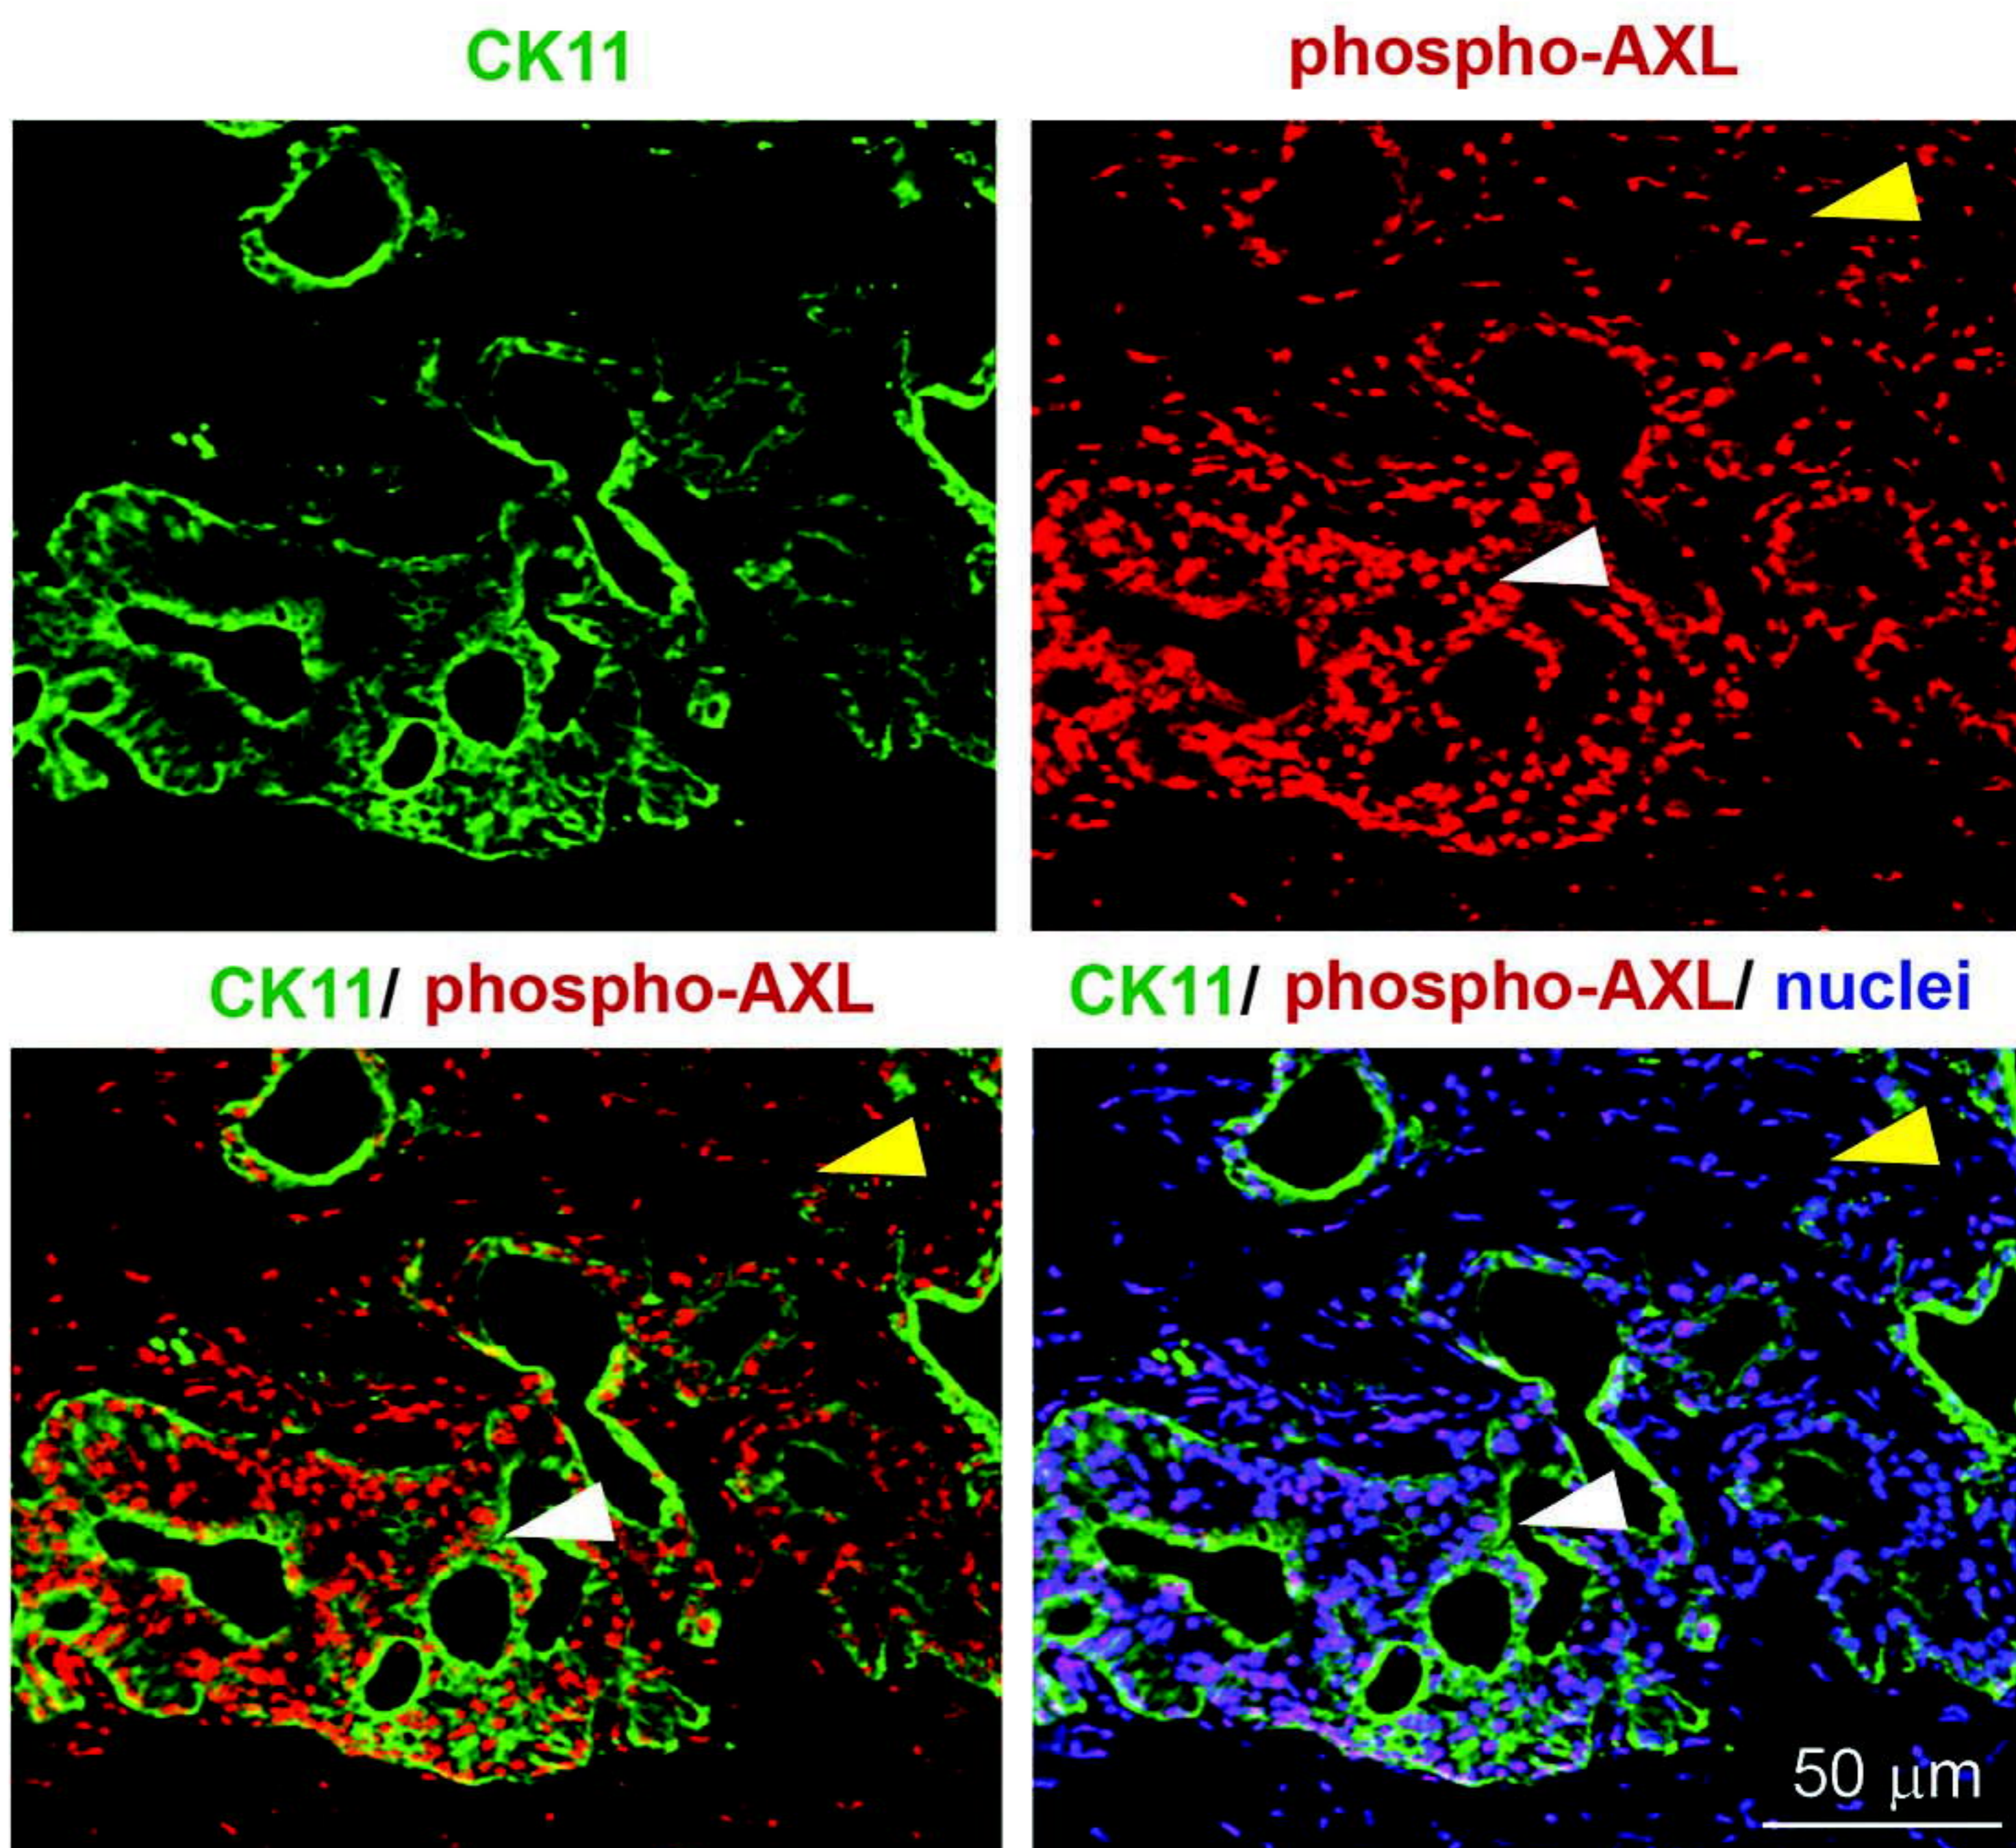

## B

Serial sections

phospho-AXL

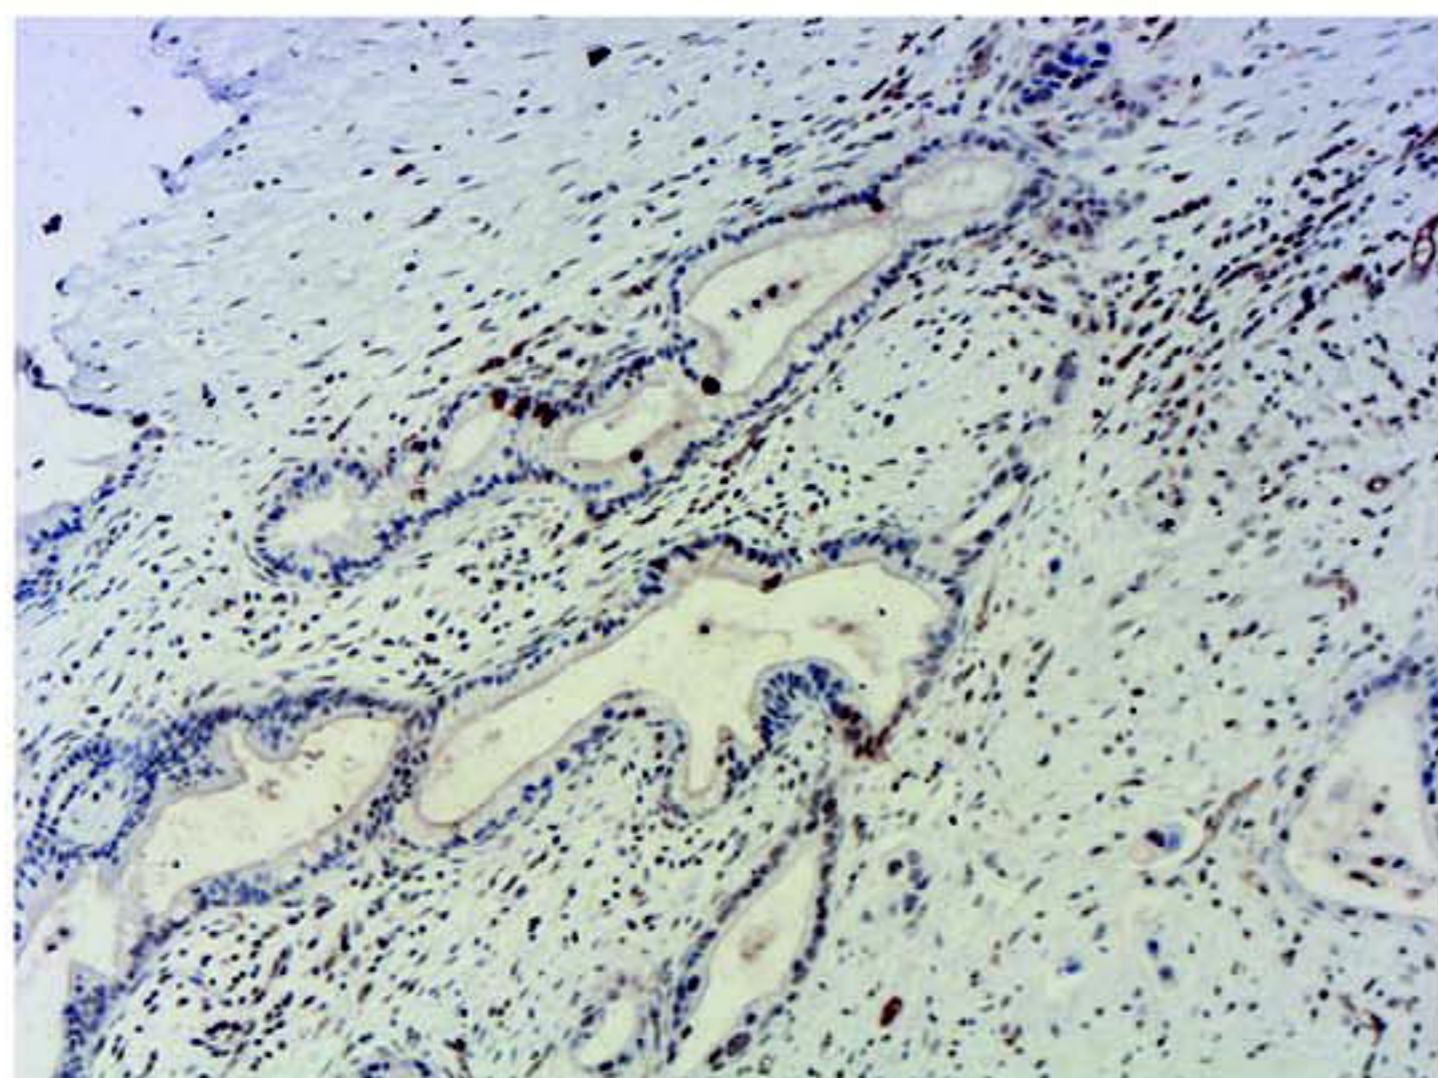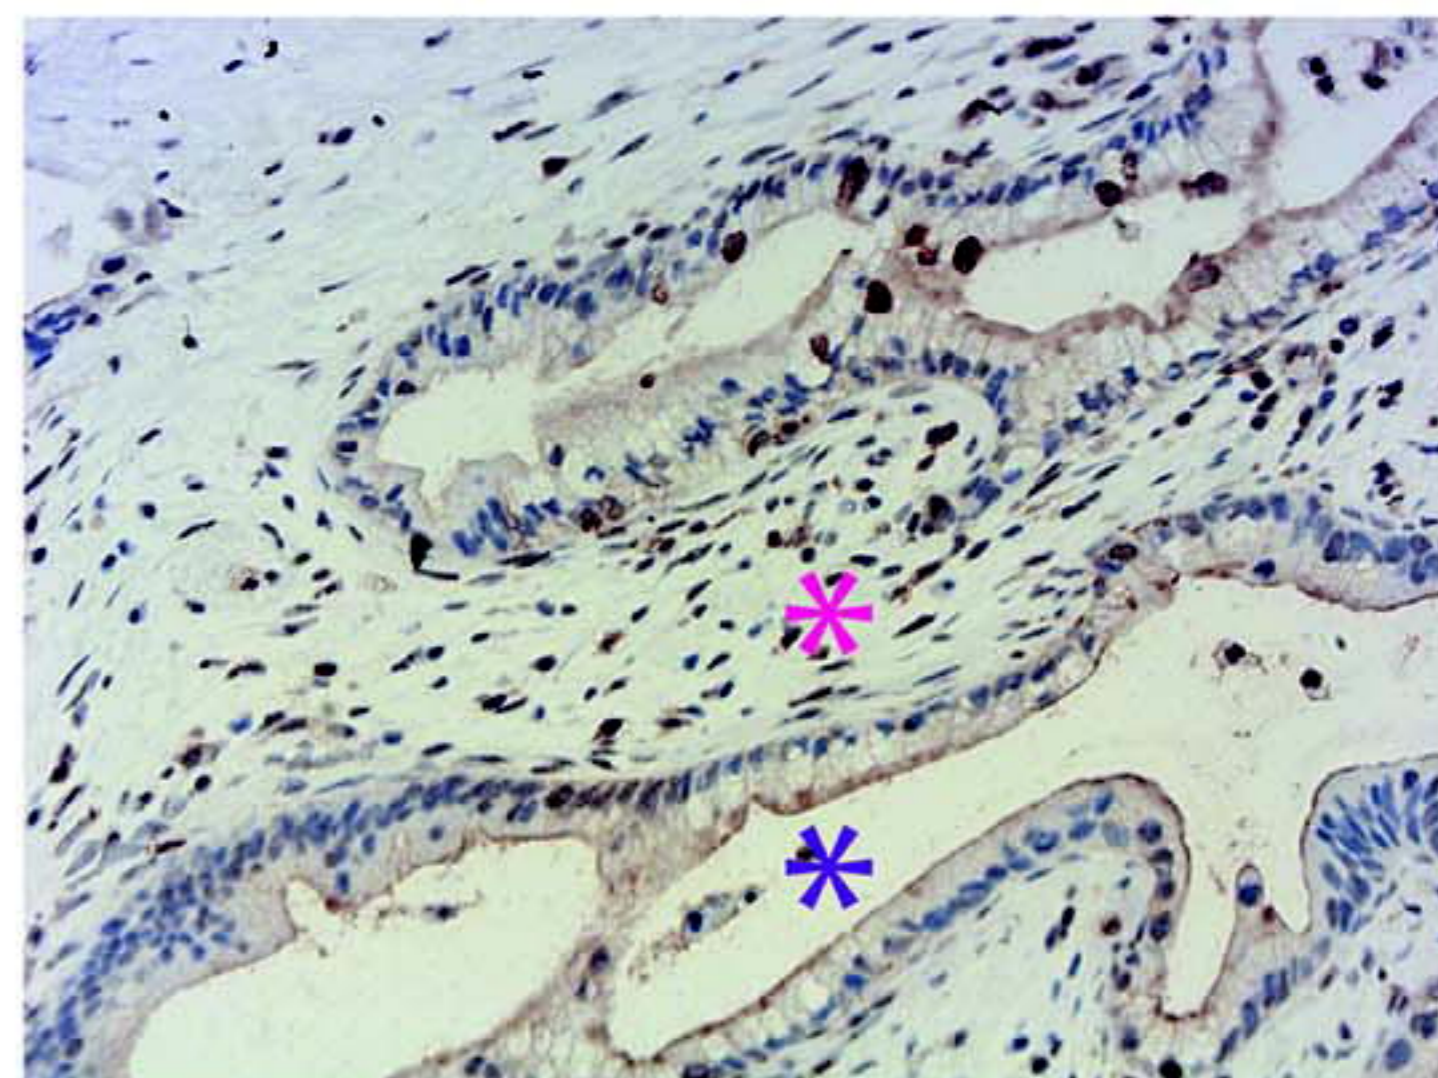

CD163

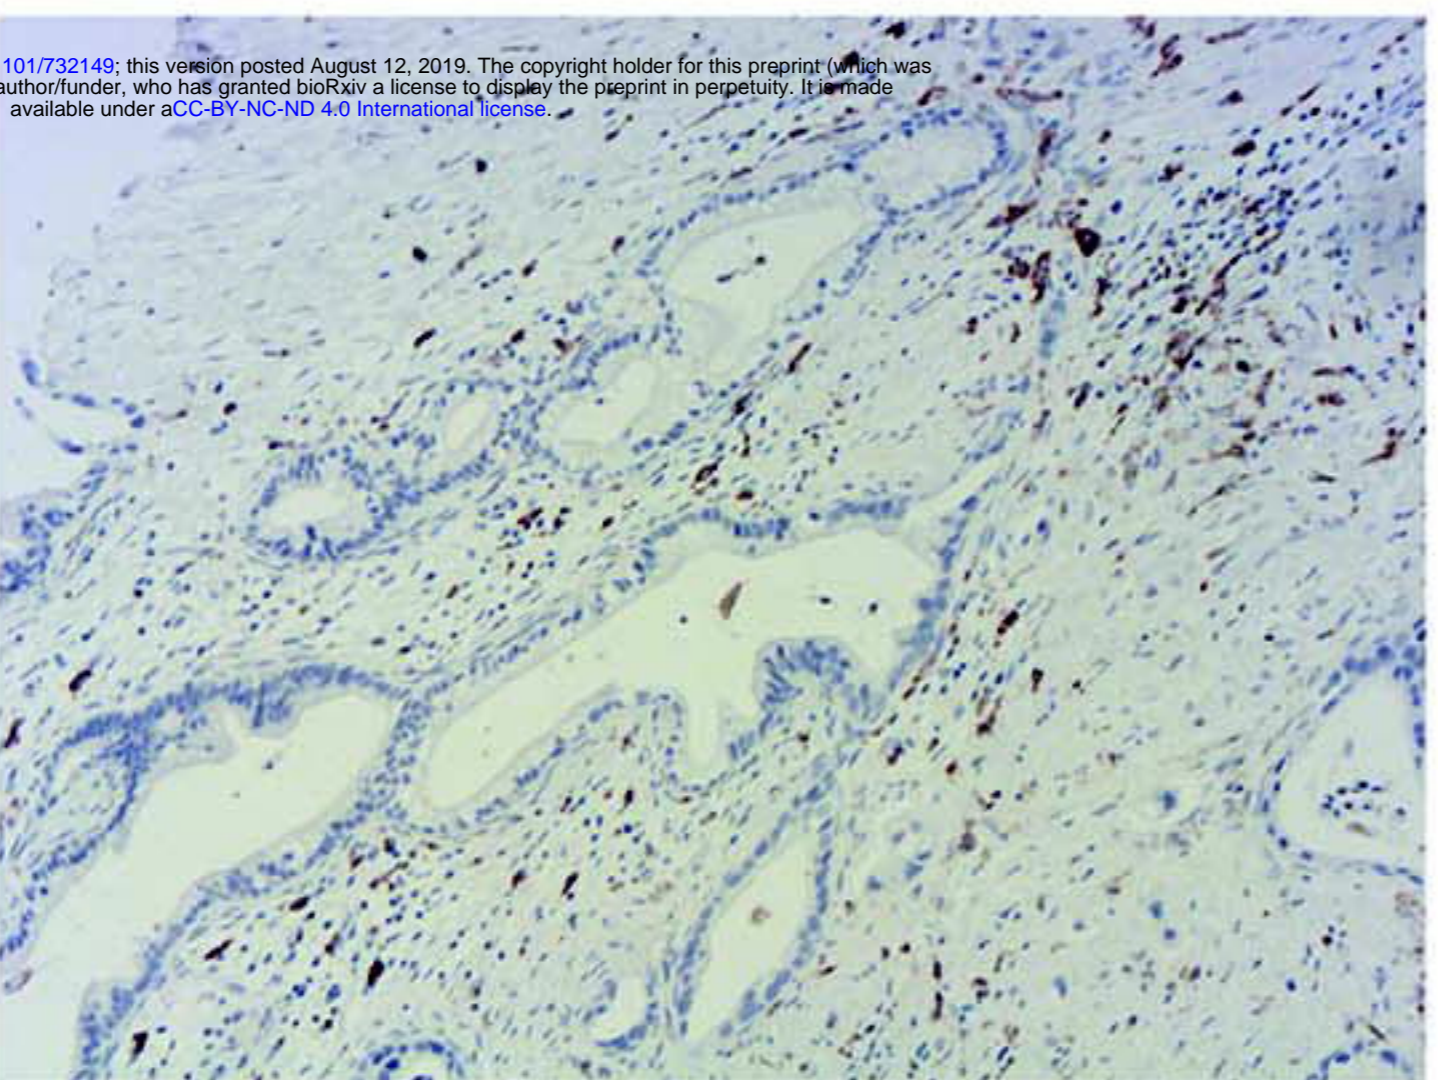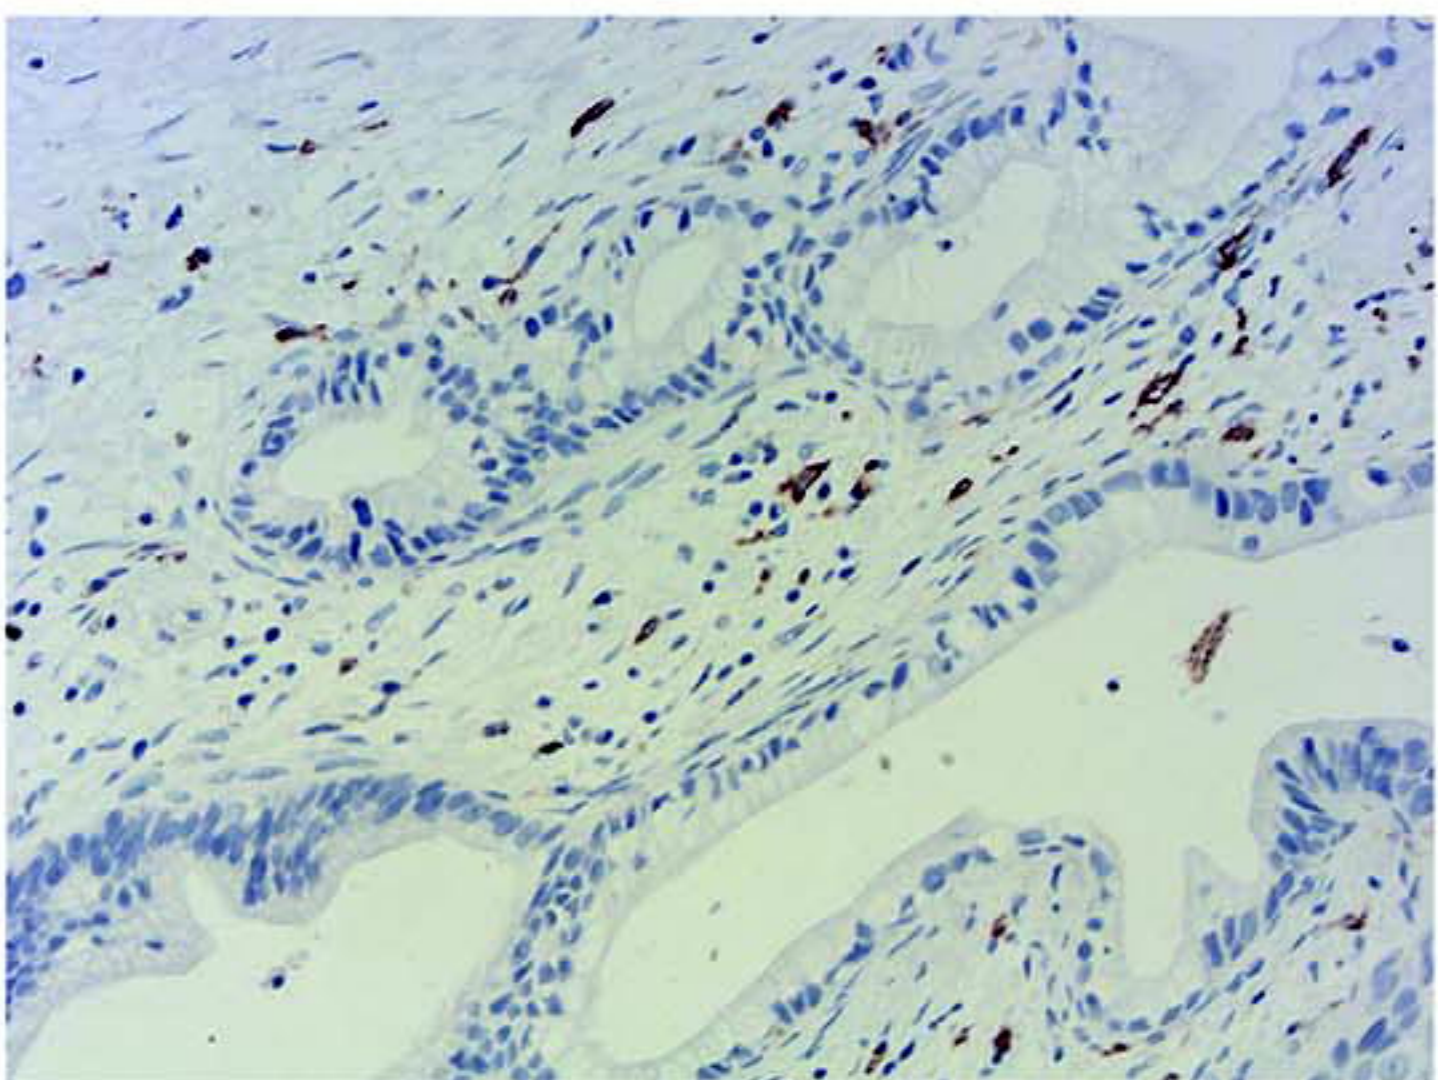

$\alpha$ SMA

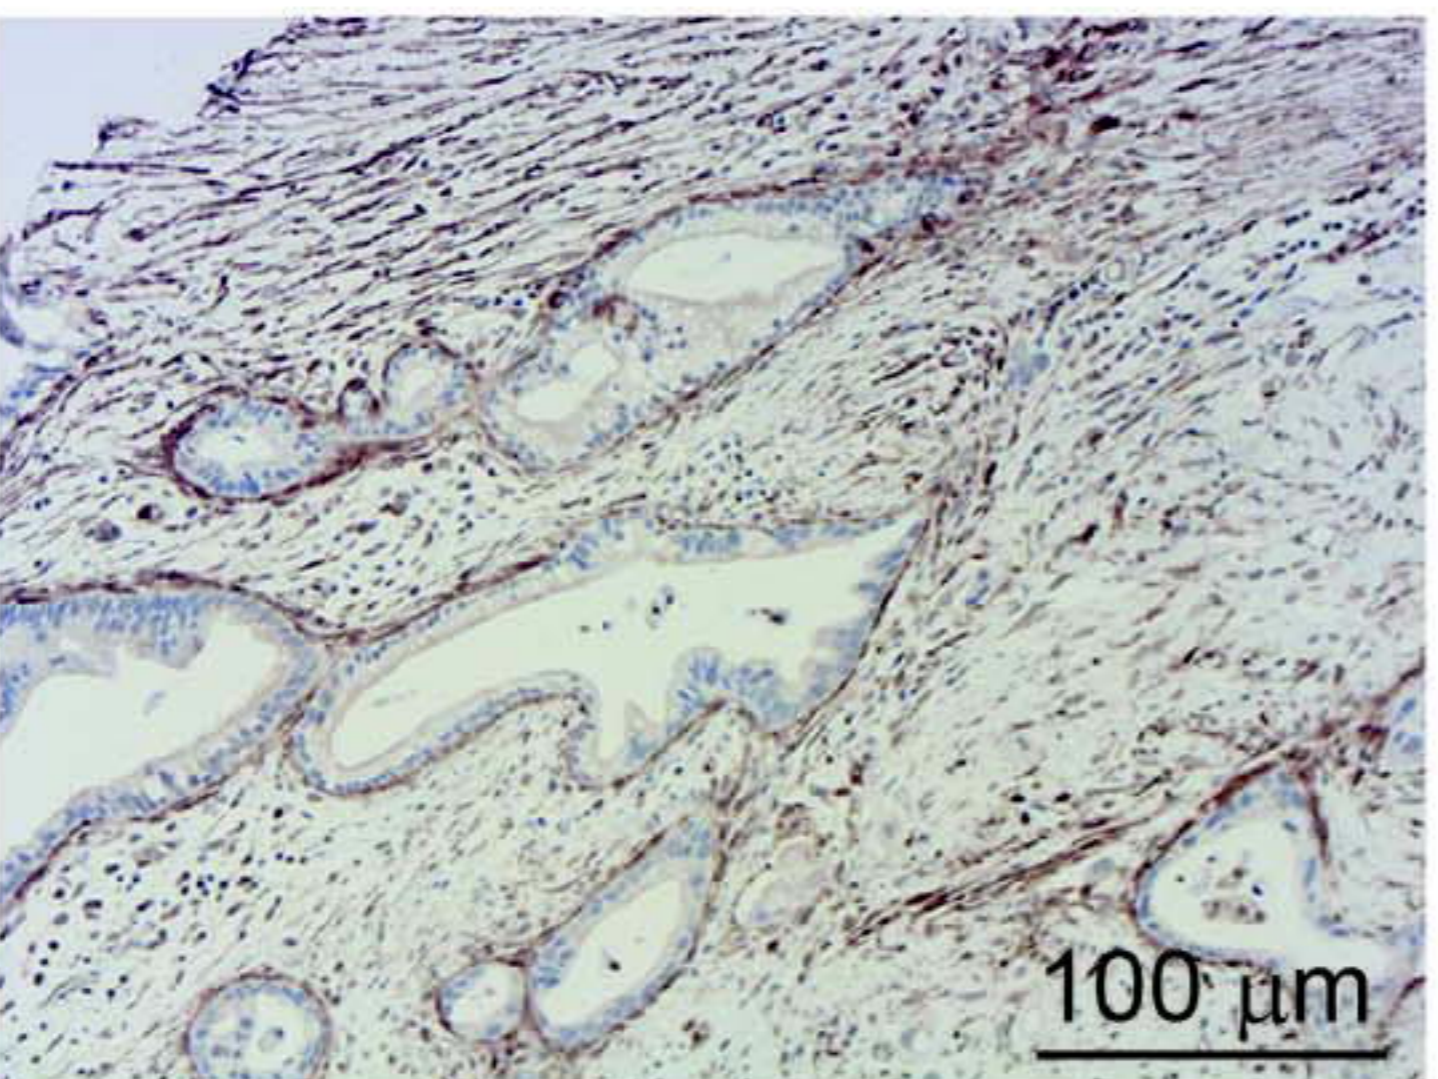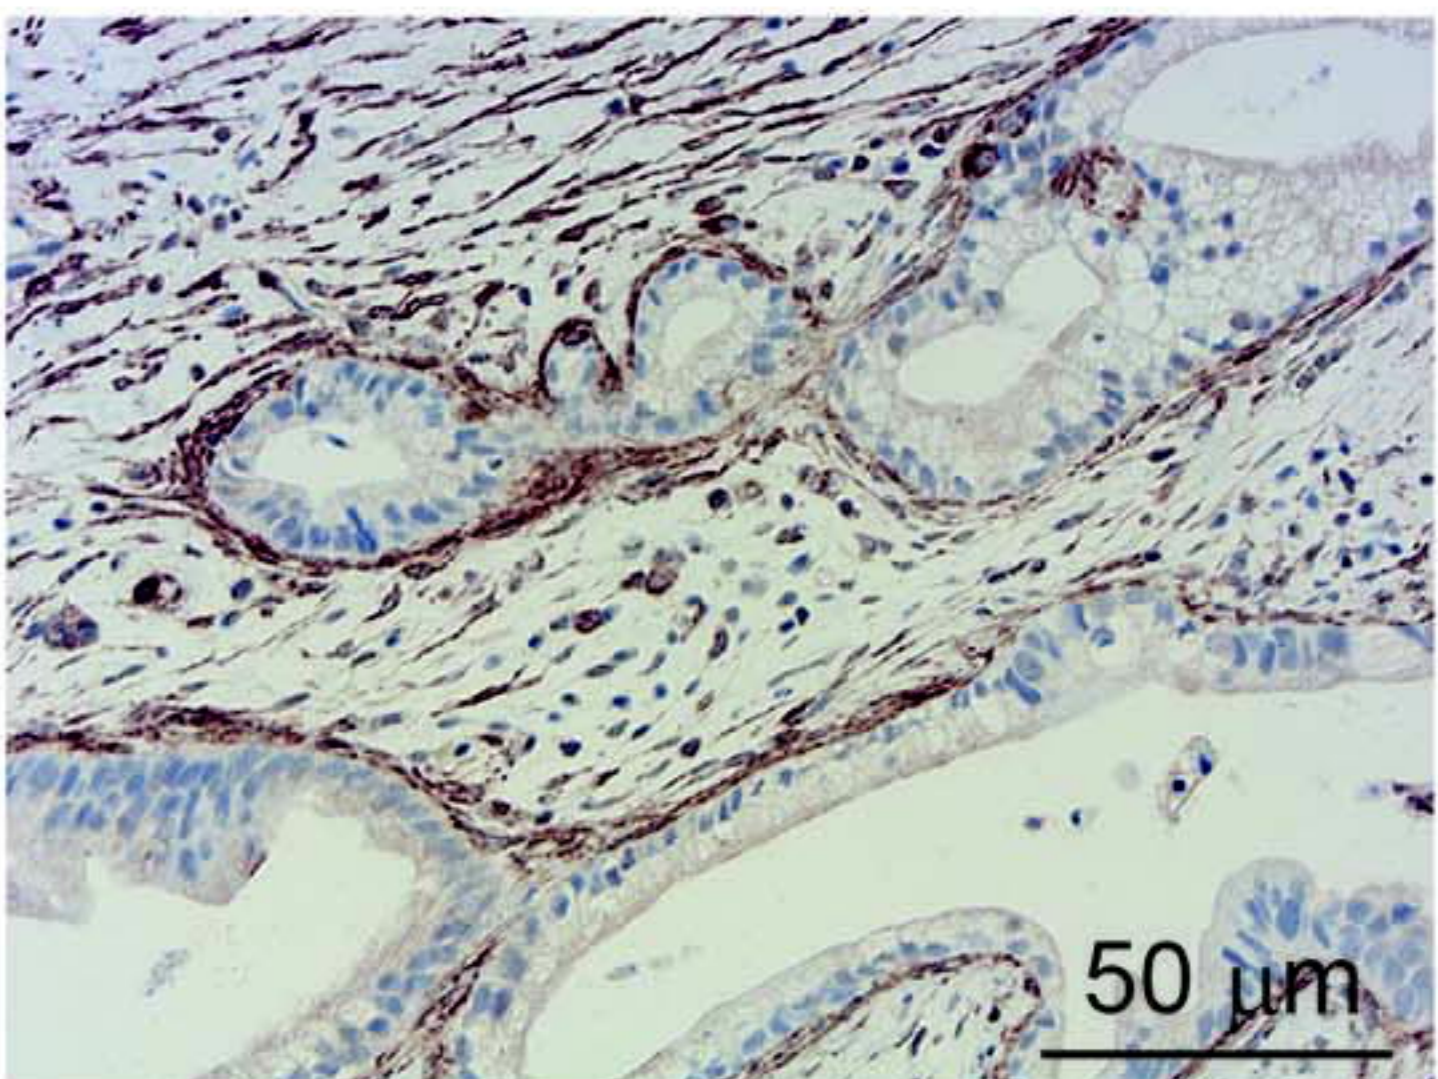



**A**

Tumor cells

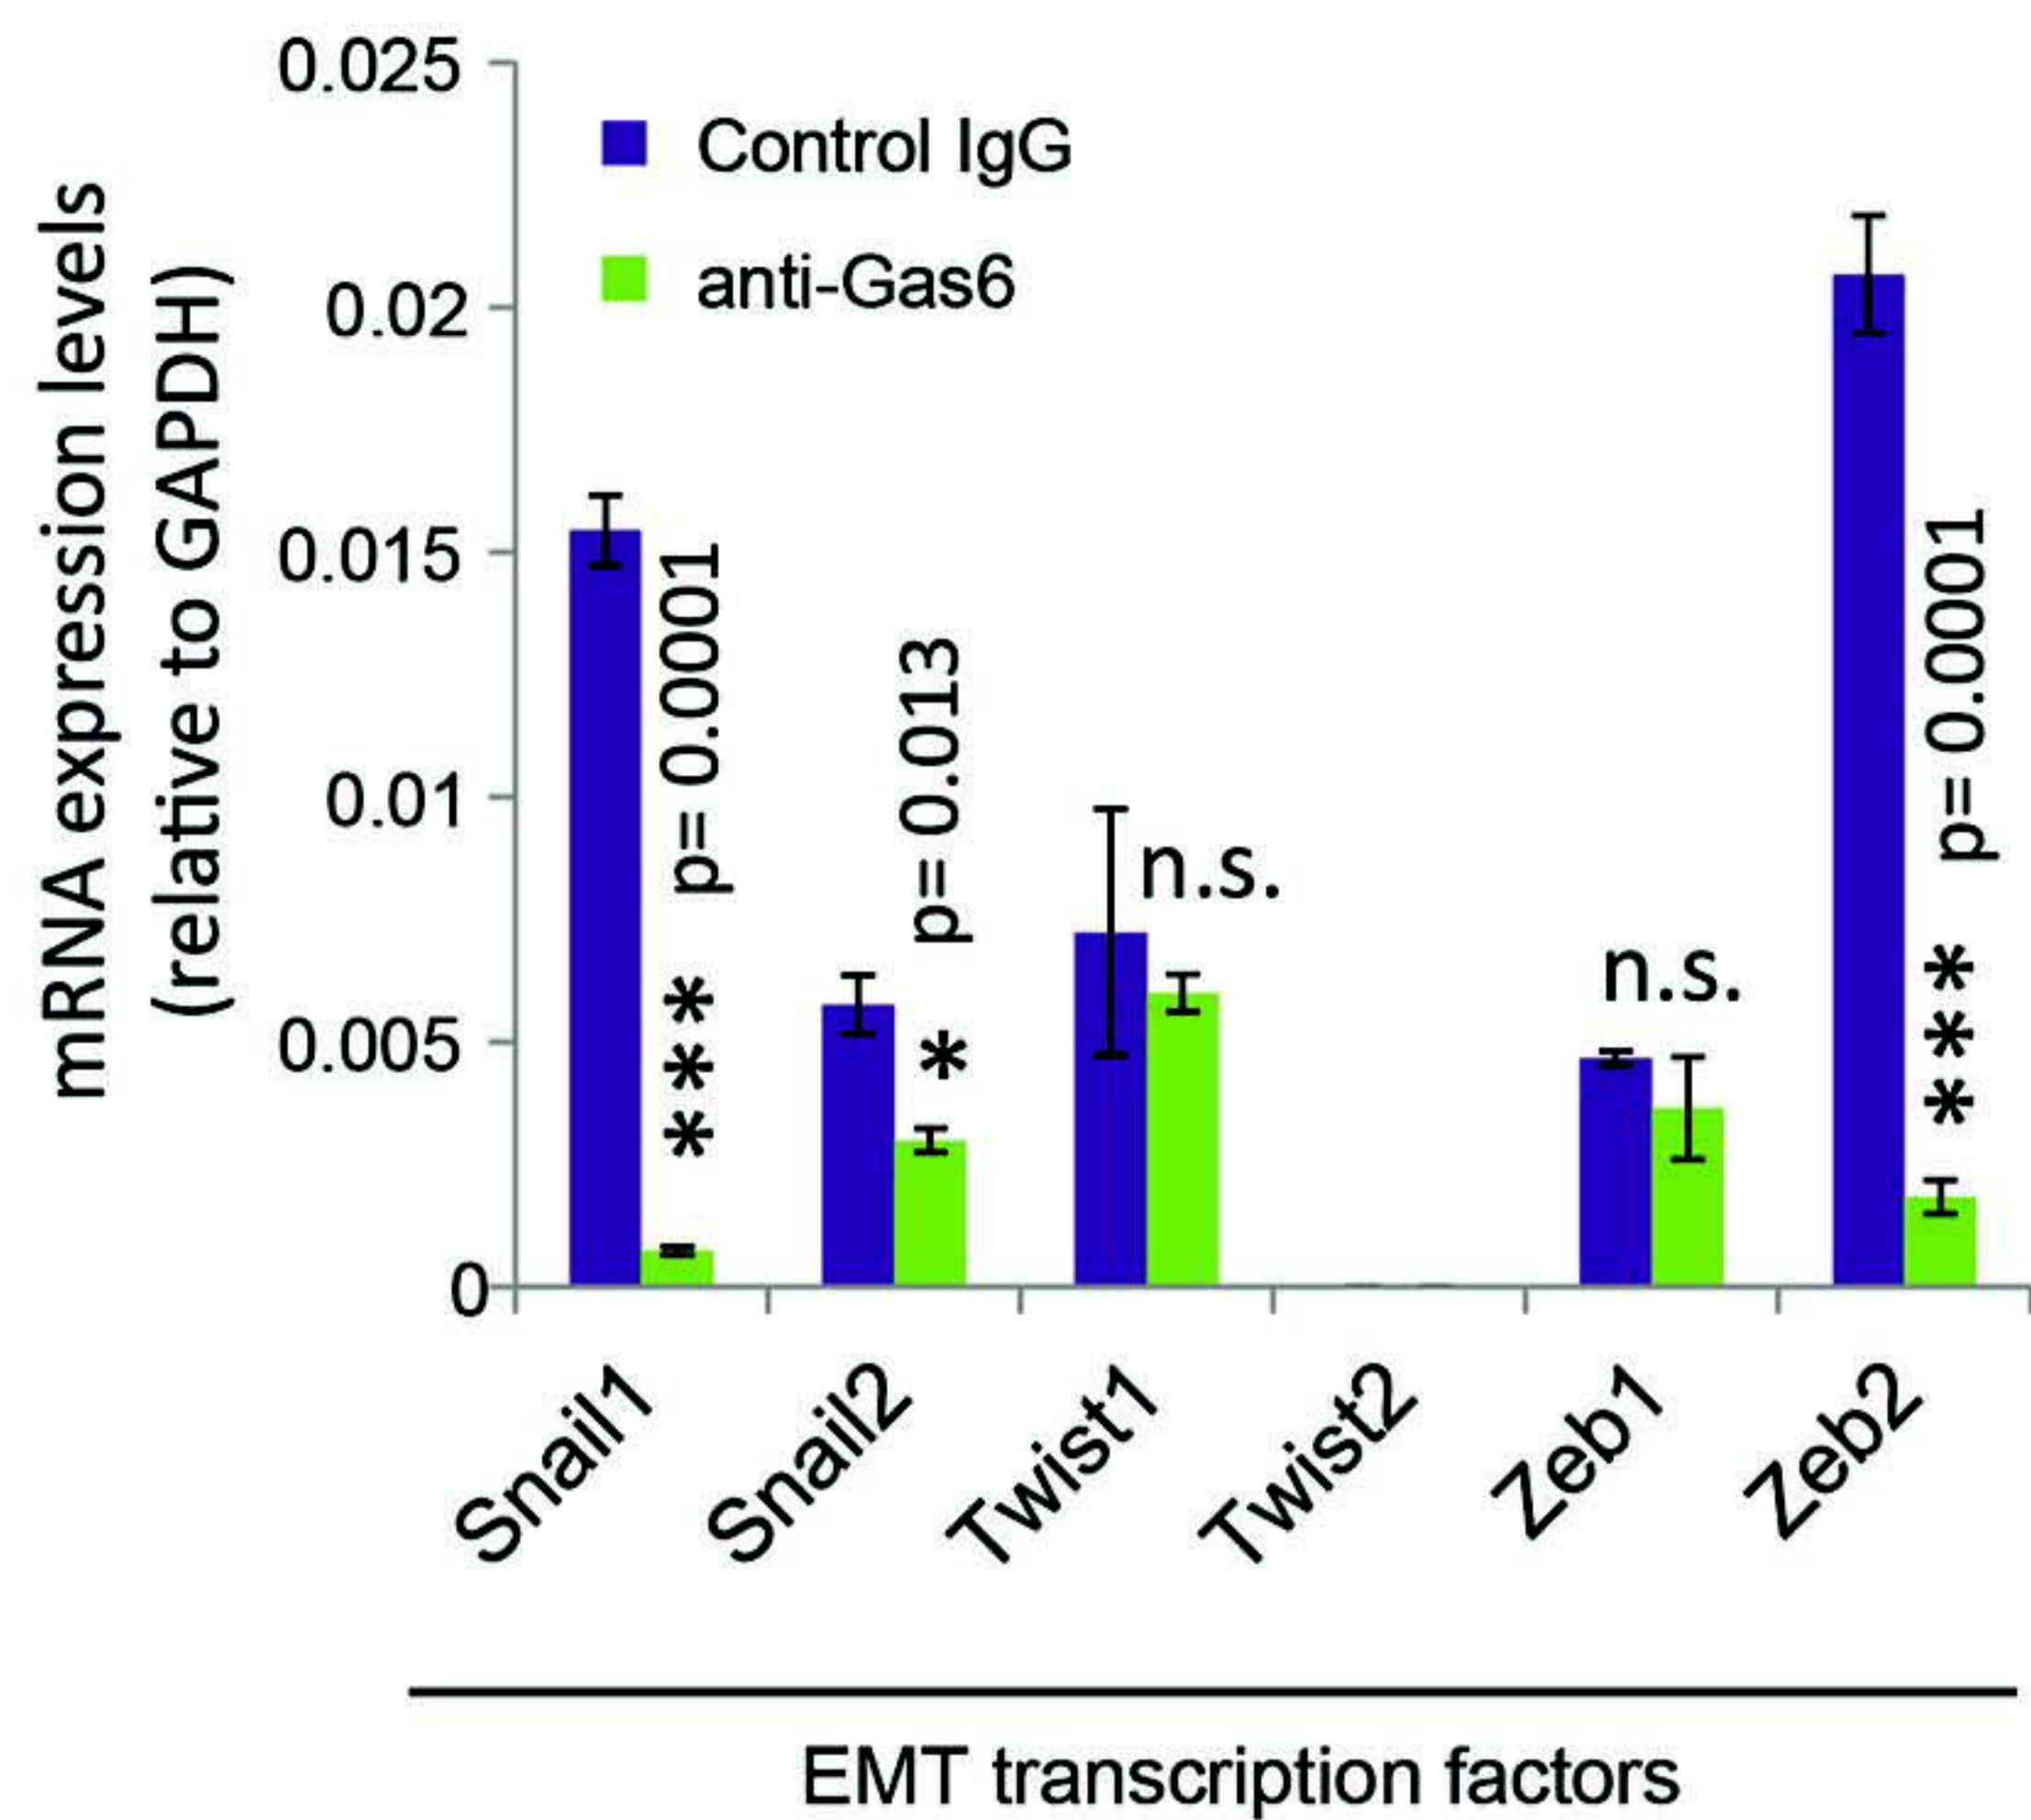**B**

Tumor cells

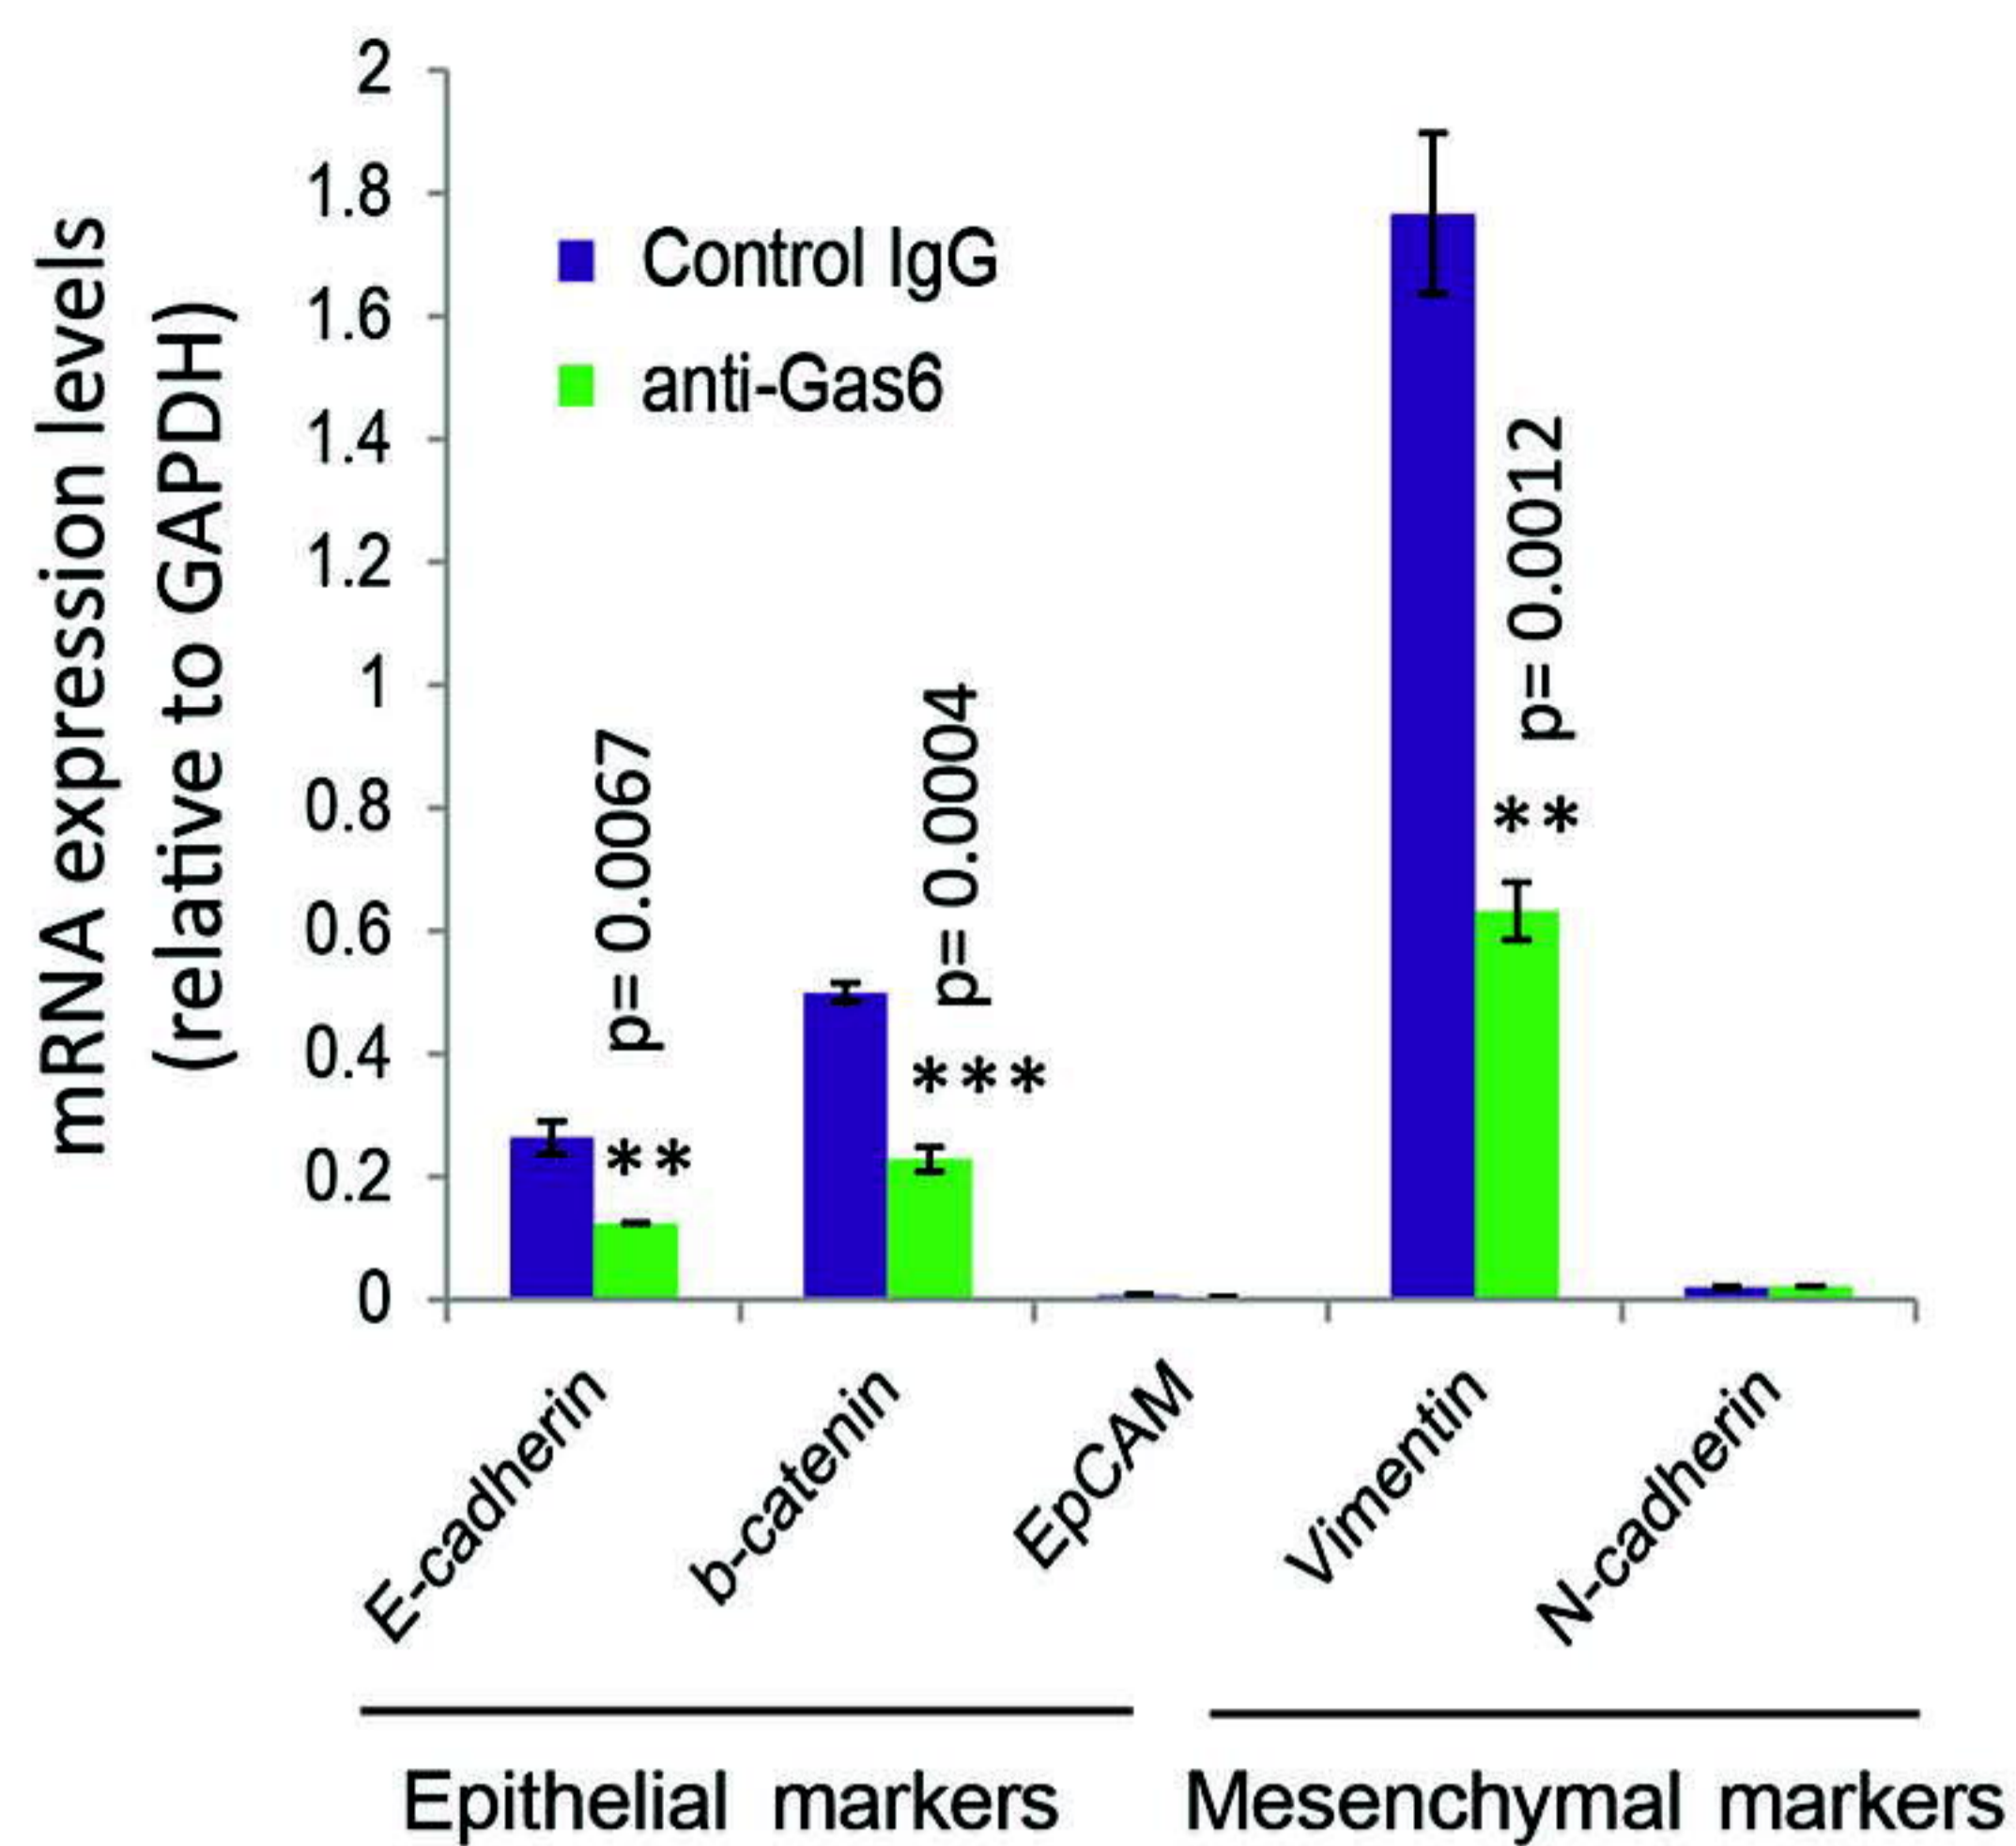**C**

Mouse pancreatic tumors

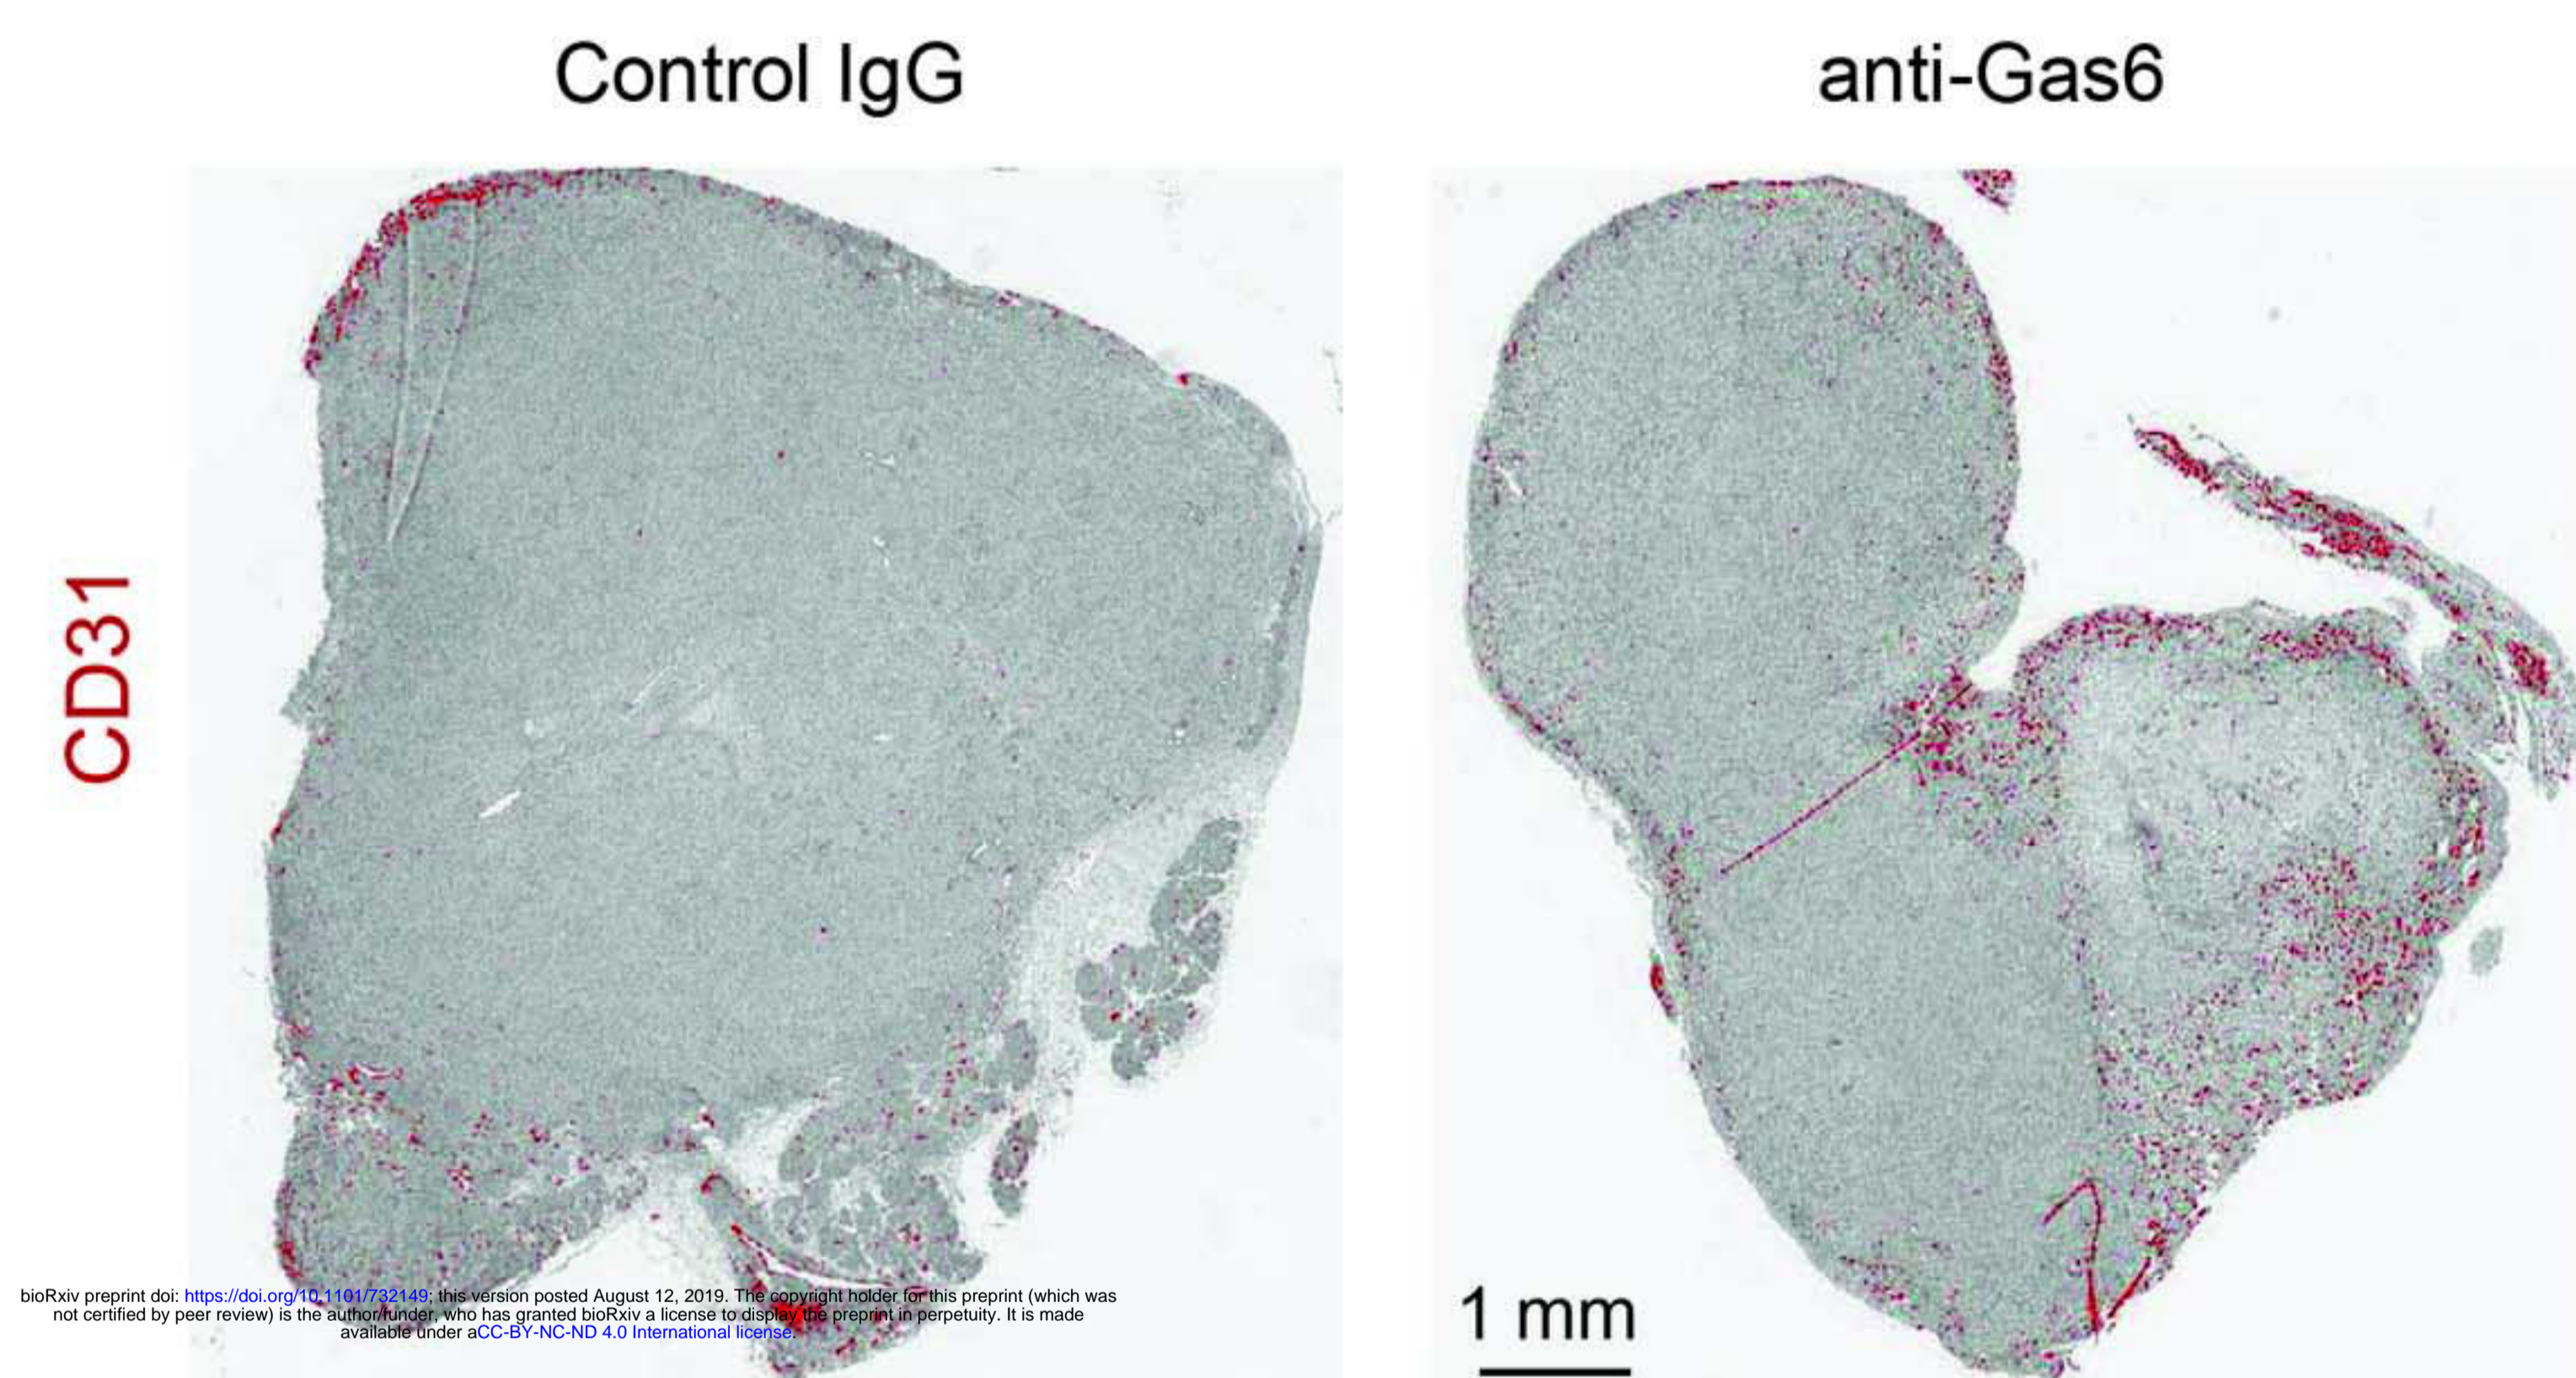

bioRxiv preprint doi: <https://doi.org/10.1101/073145>; this version posted August 12, 2019. The copyright holder for this preprint (which was not certified by peer review) is the author/funder, who has granted bioRxiv a license to display the preprint in perpetuity. It is made available under aCC-BY-NC-ND 4.0 International license.

**D**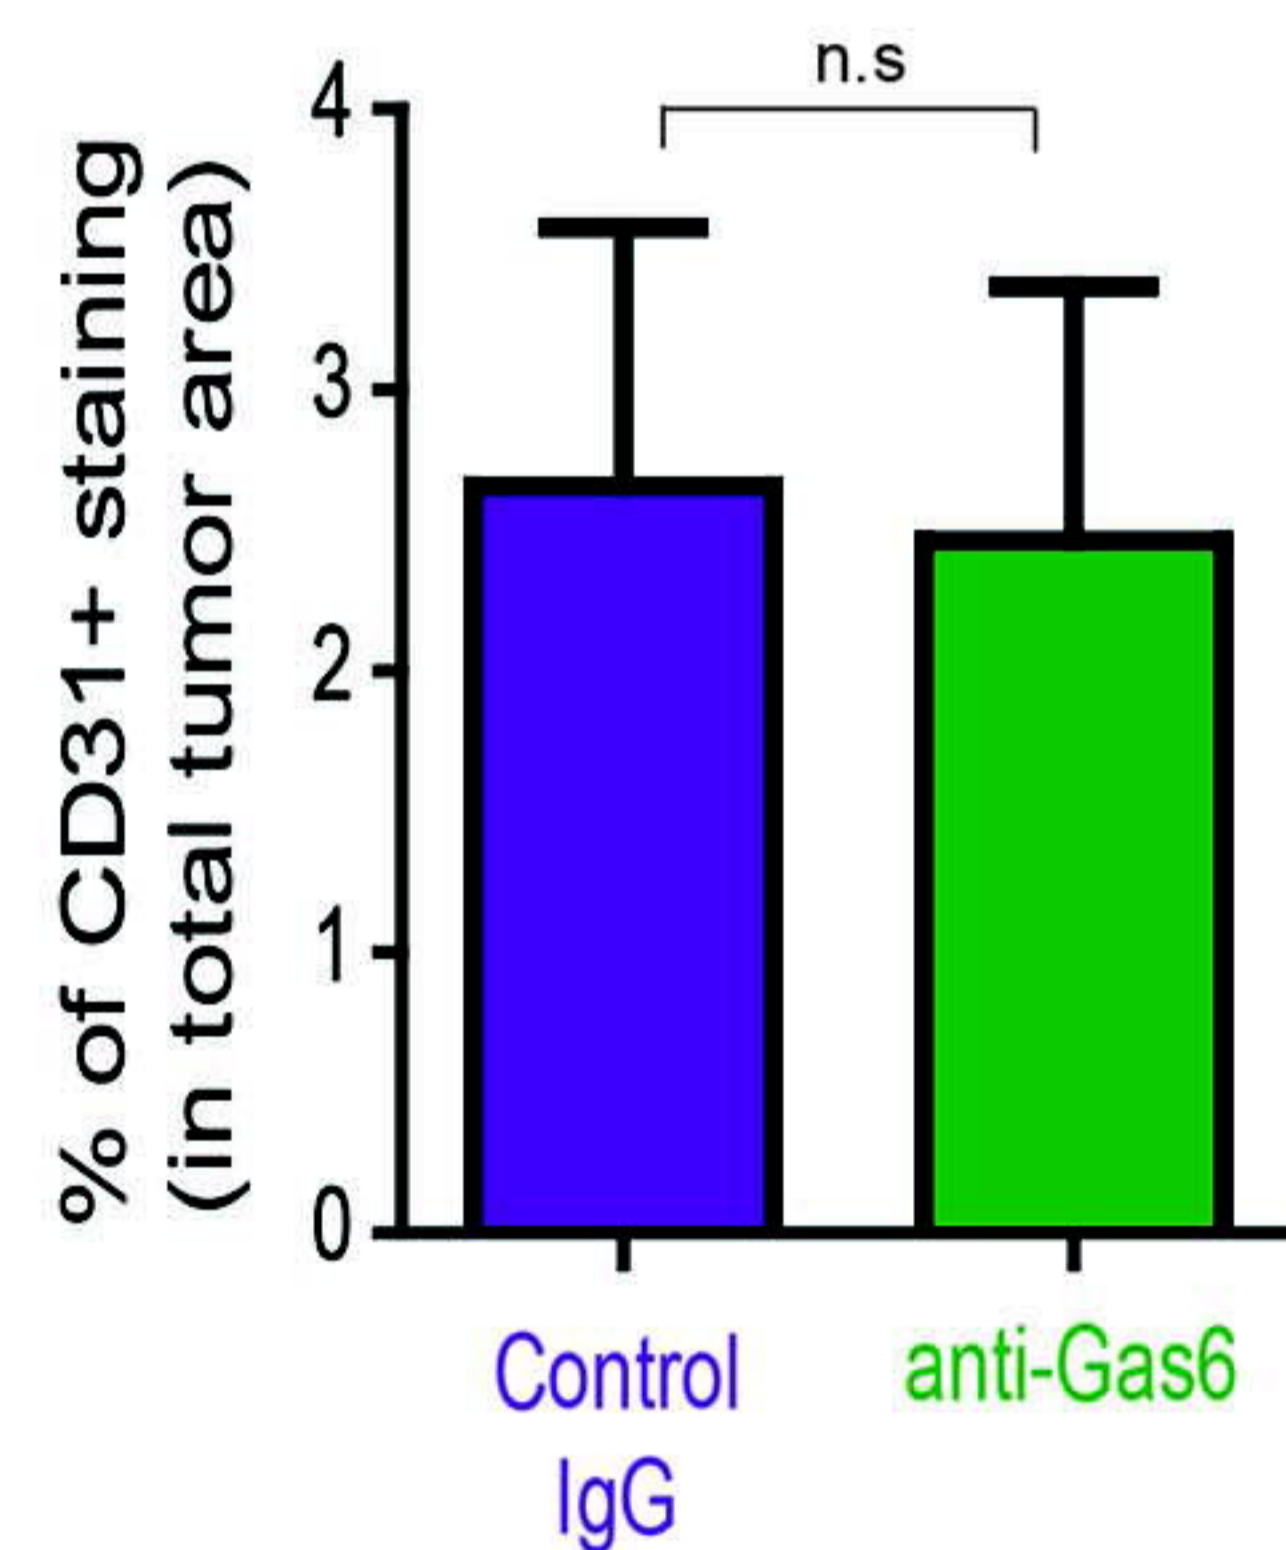**E**

picrosirius red

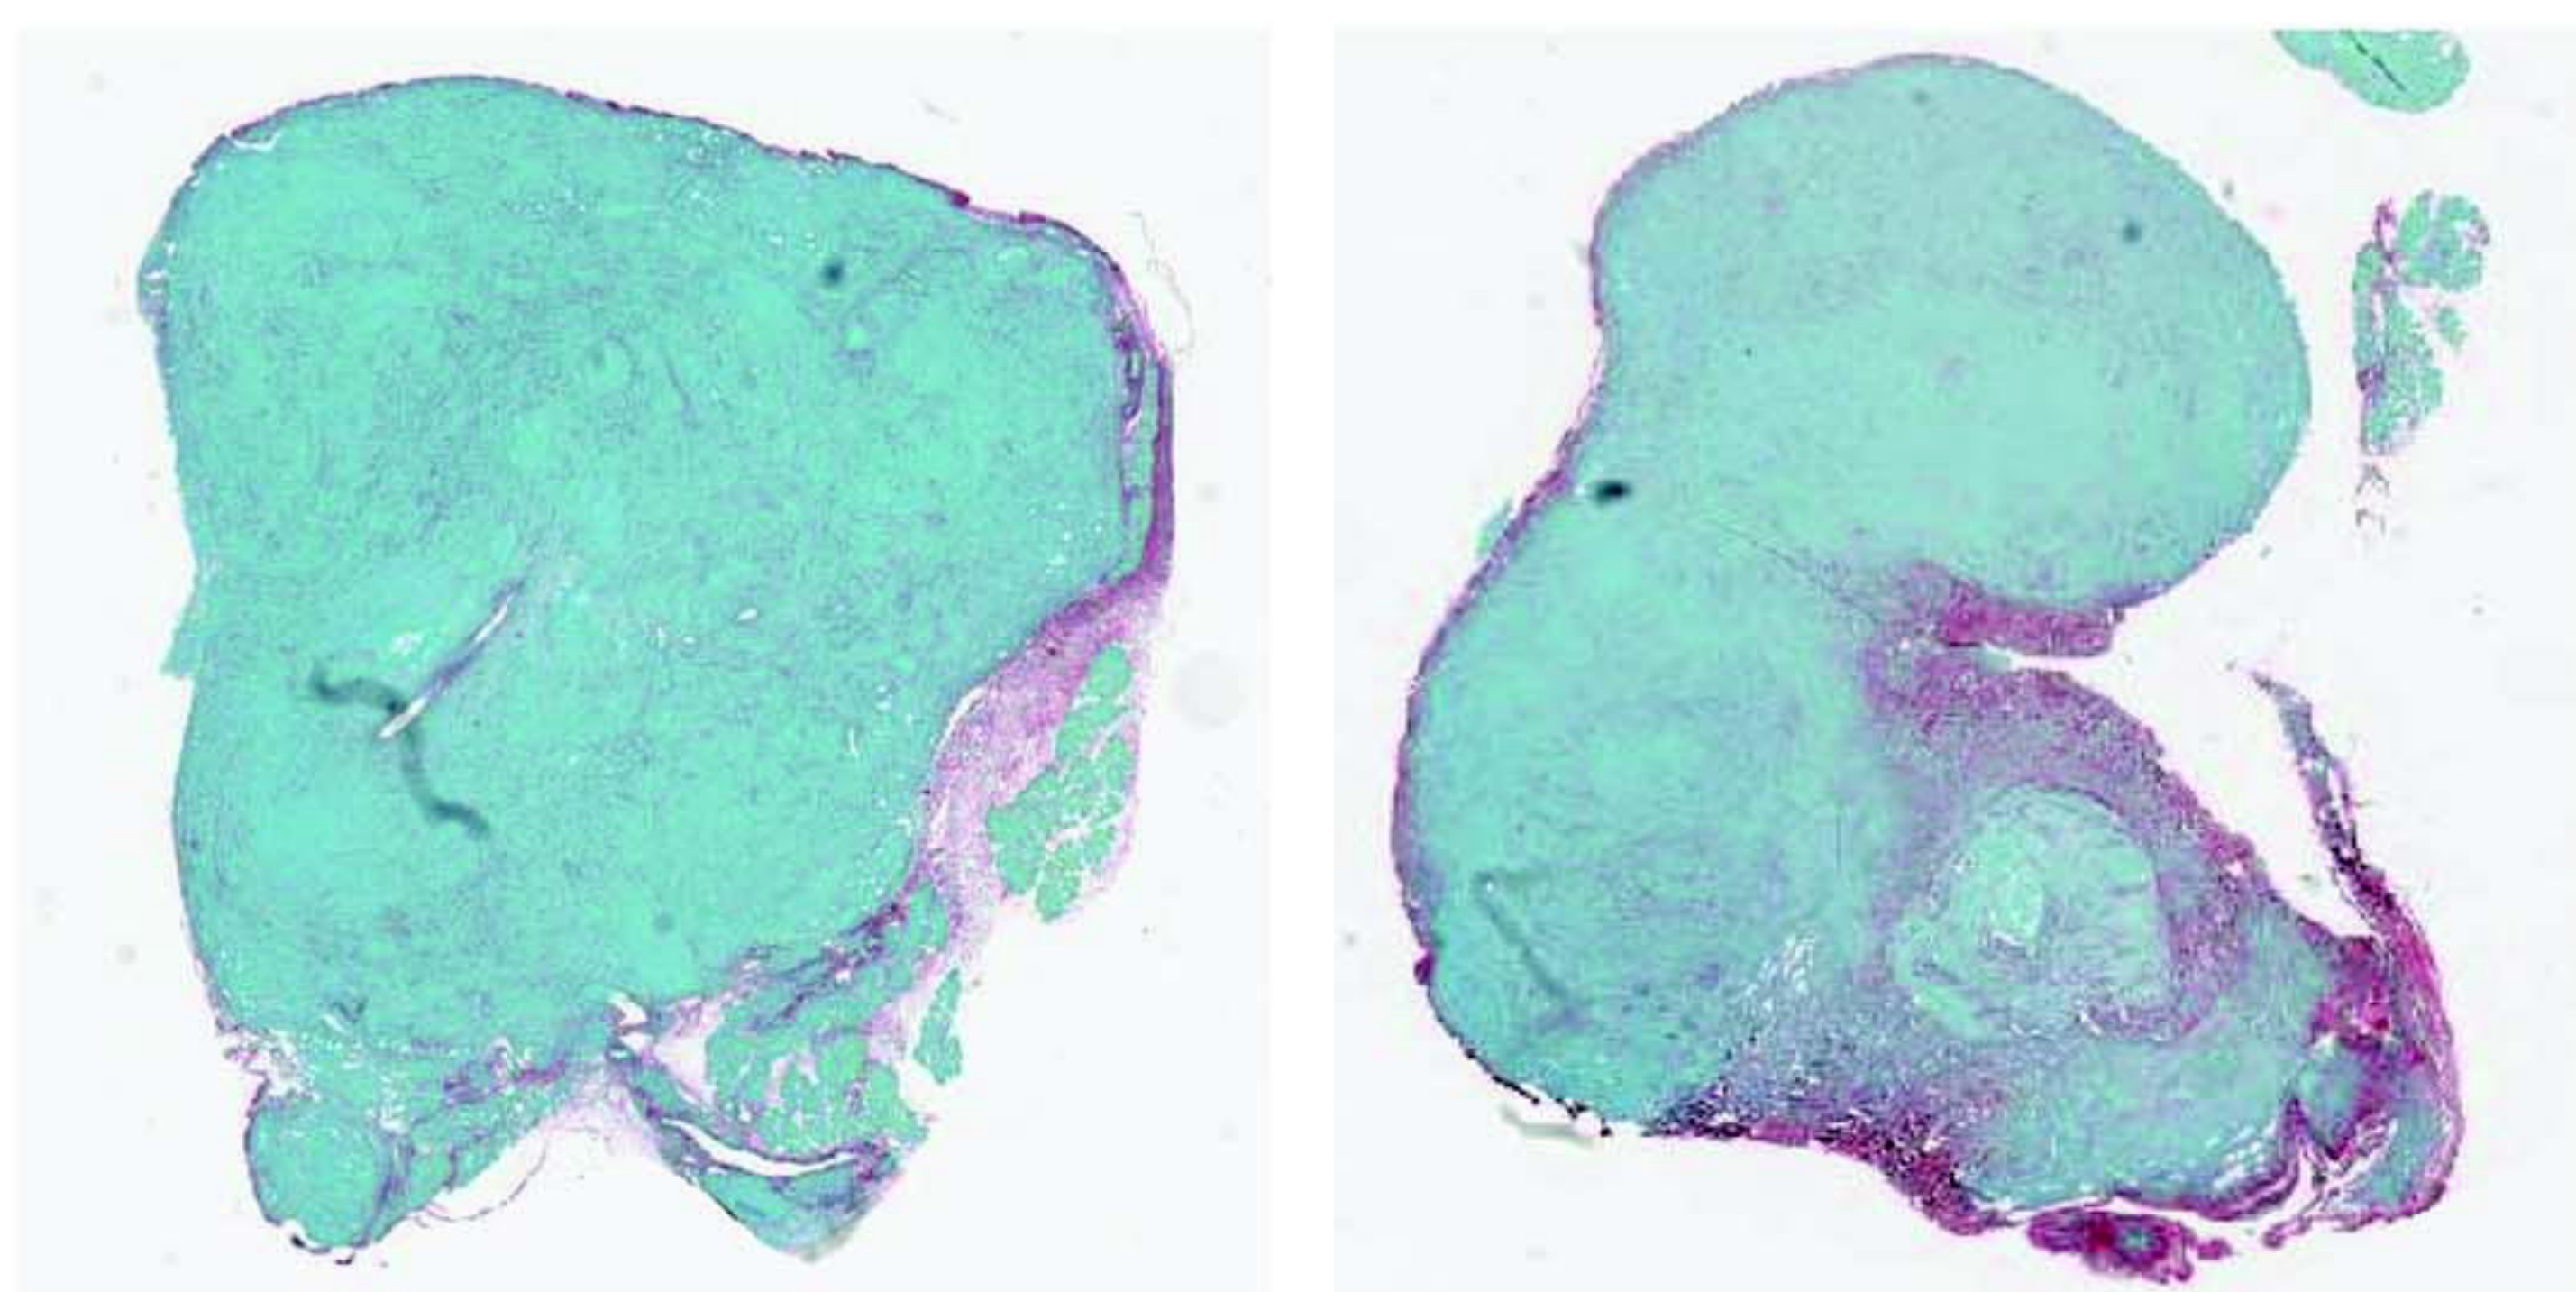**F**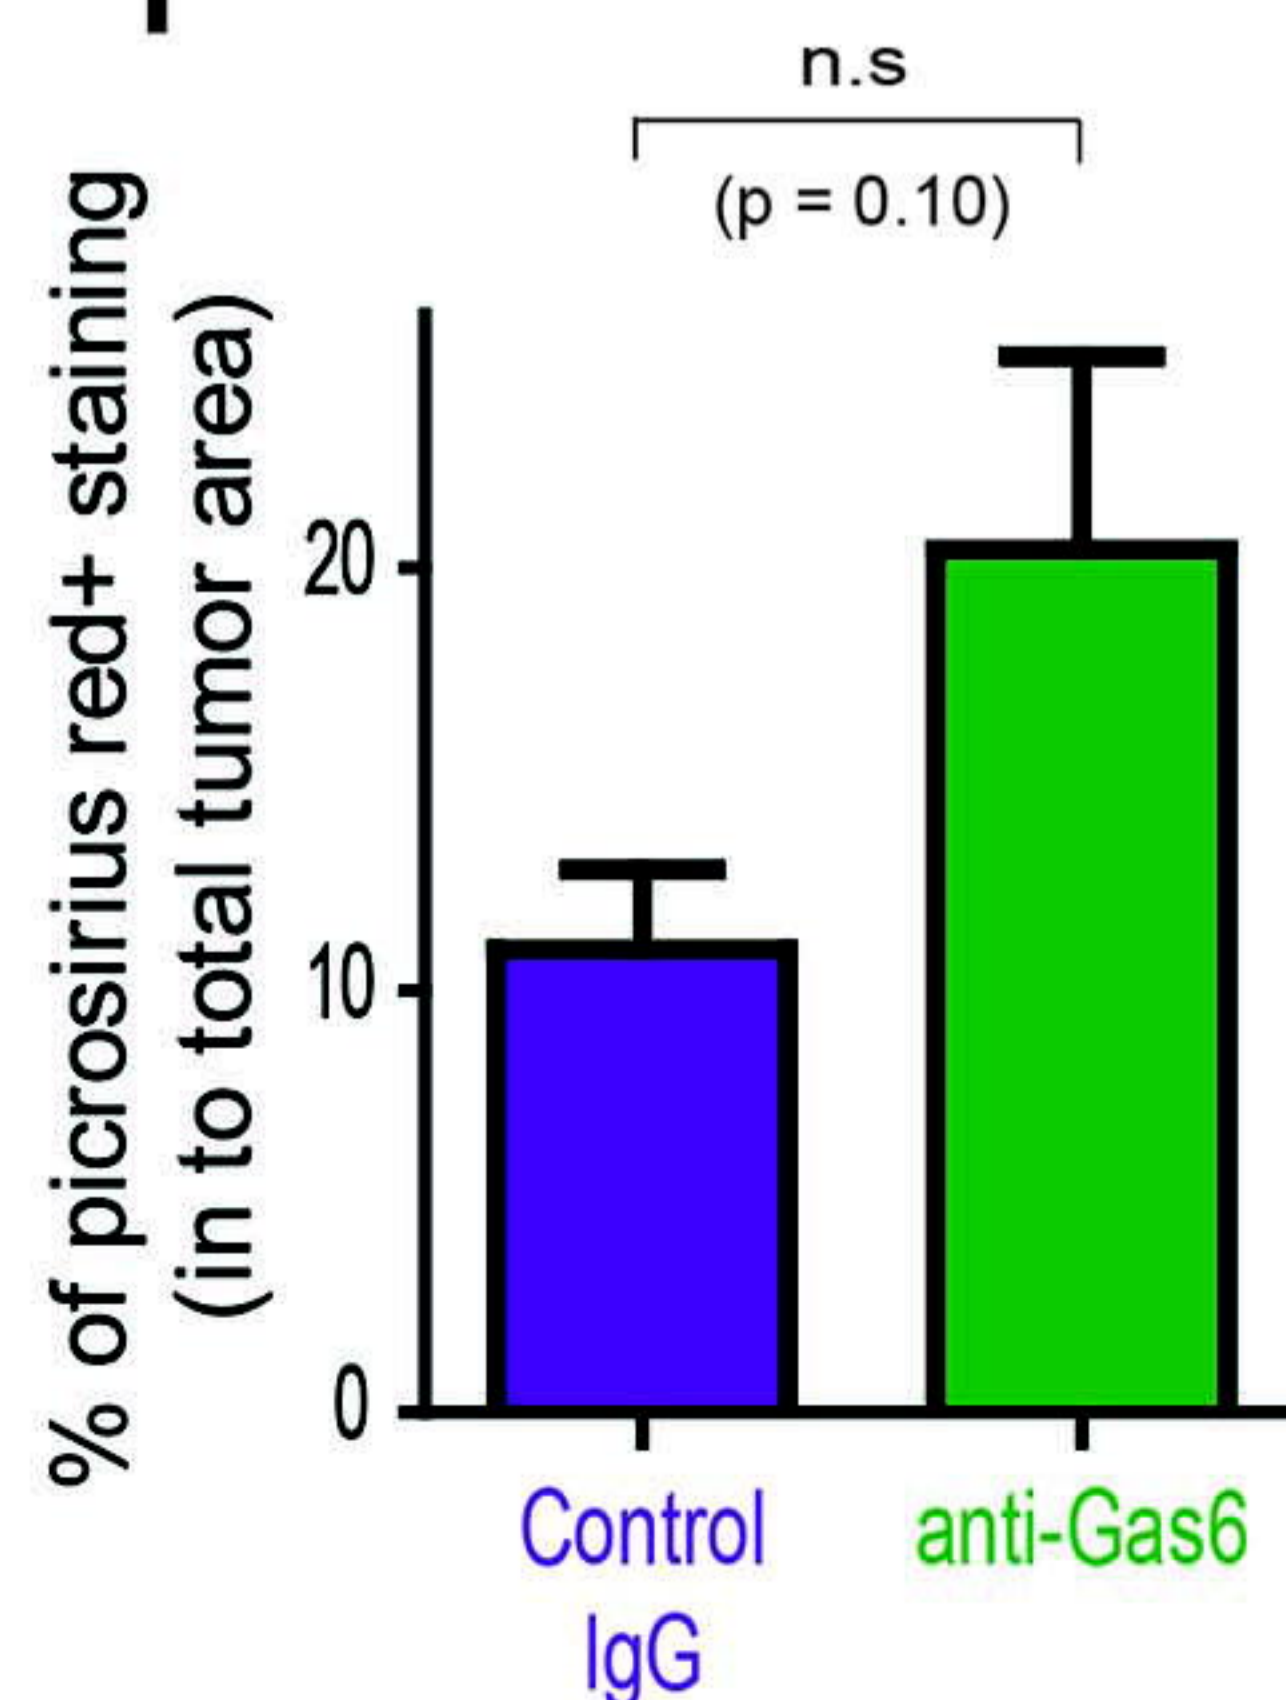

A

## Myeloid cells

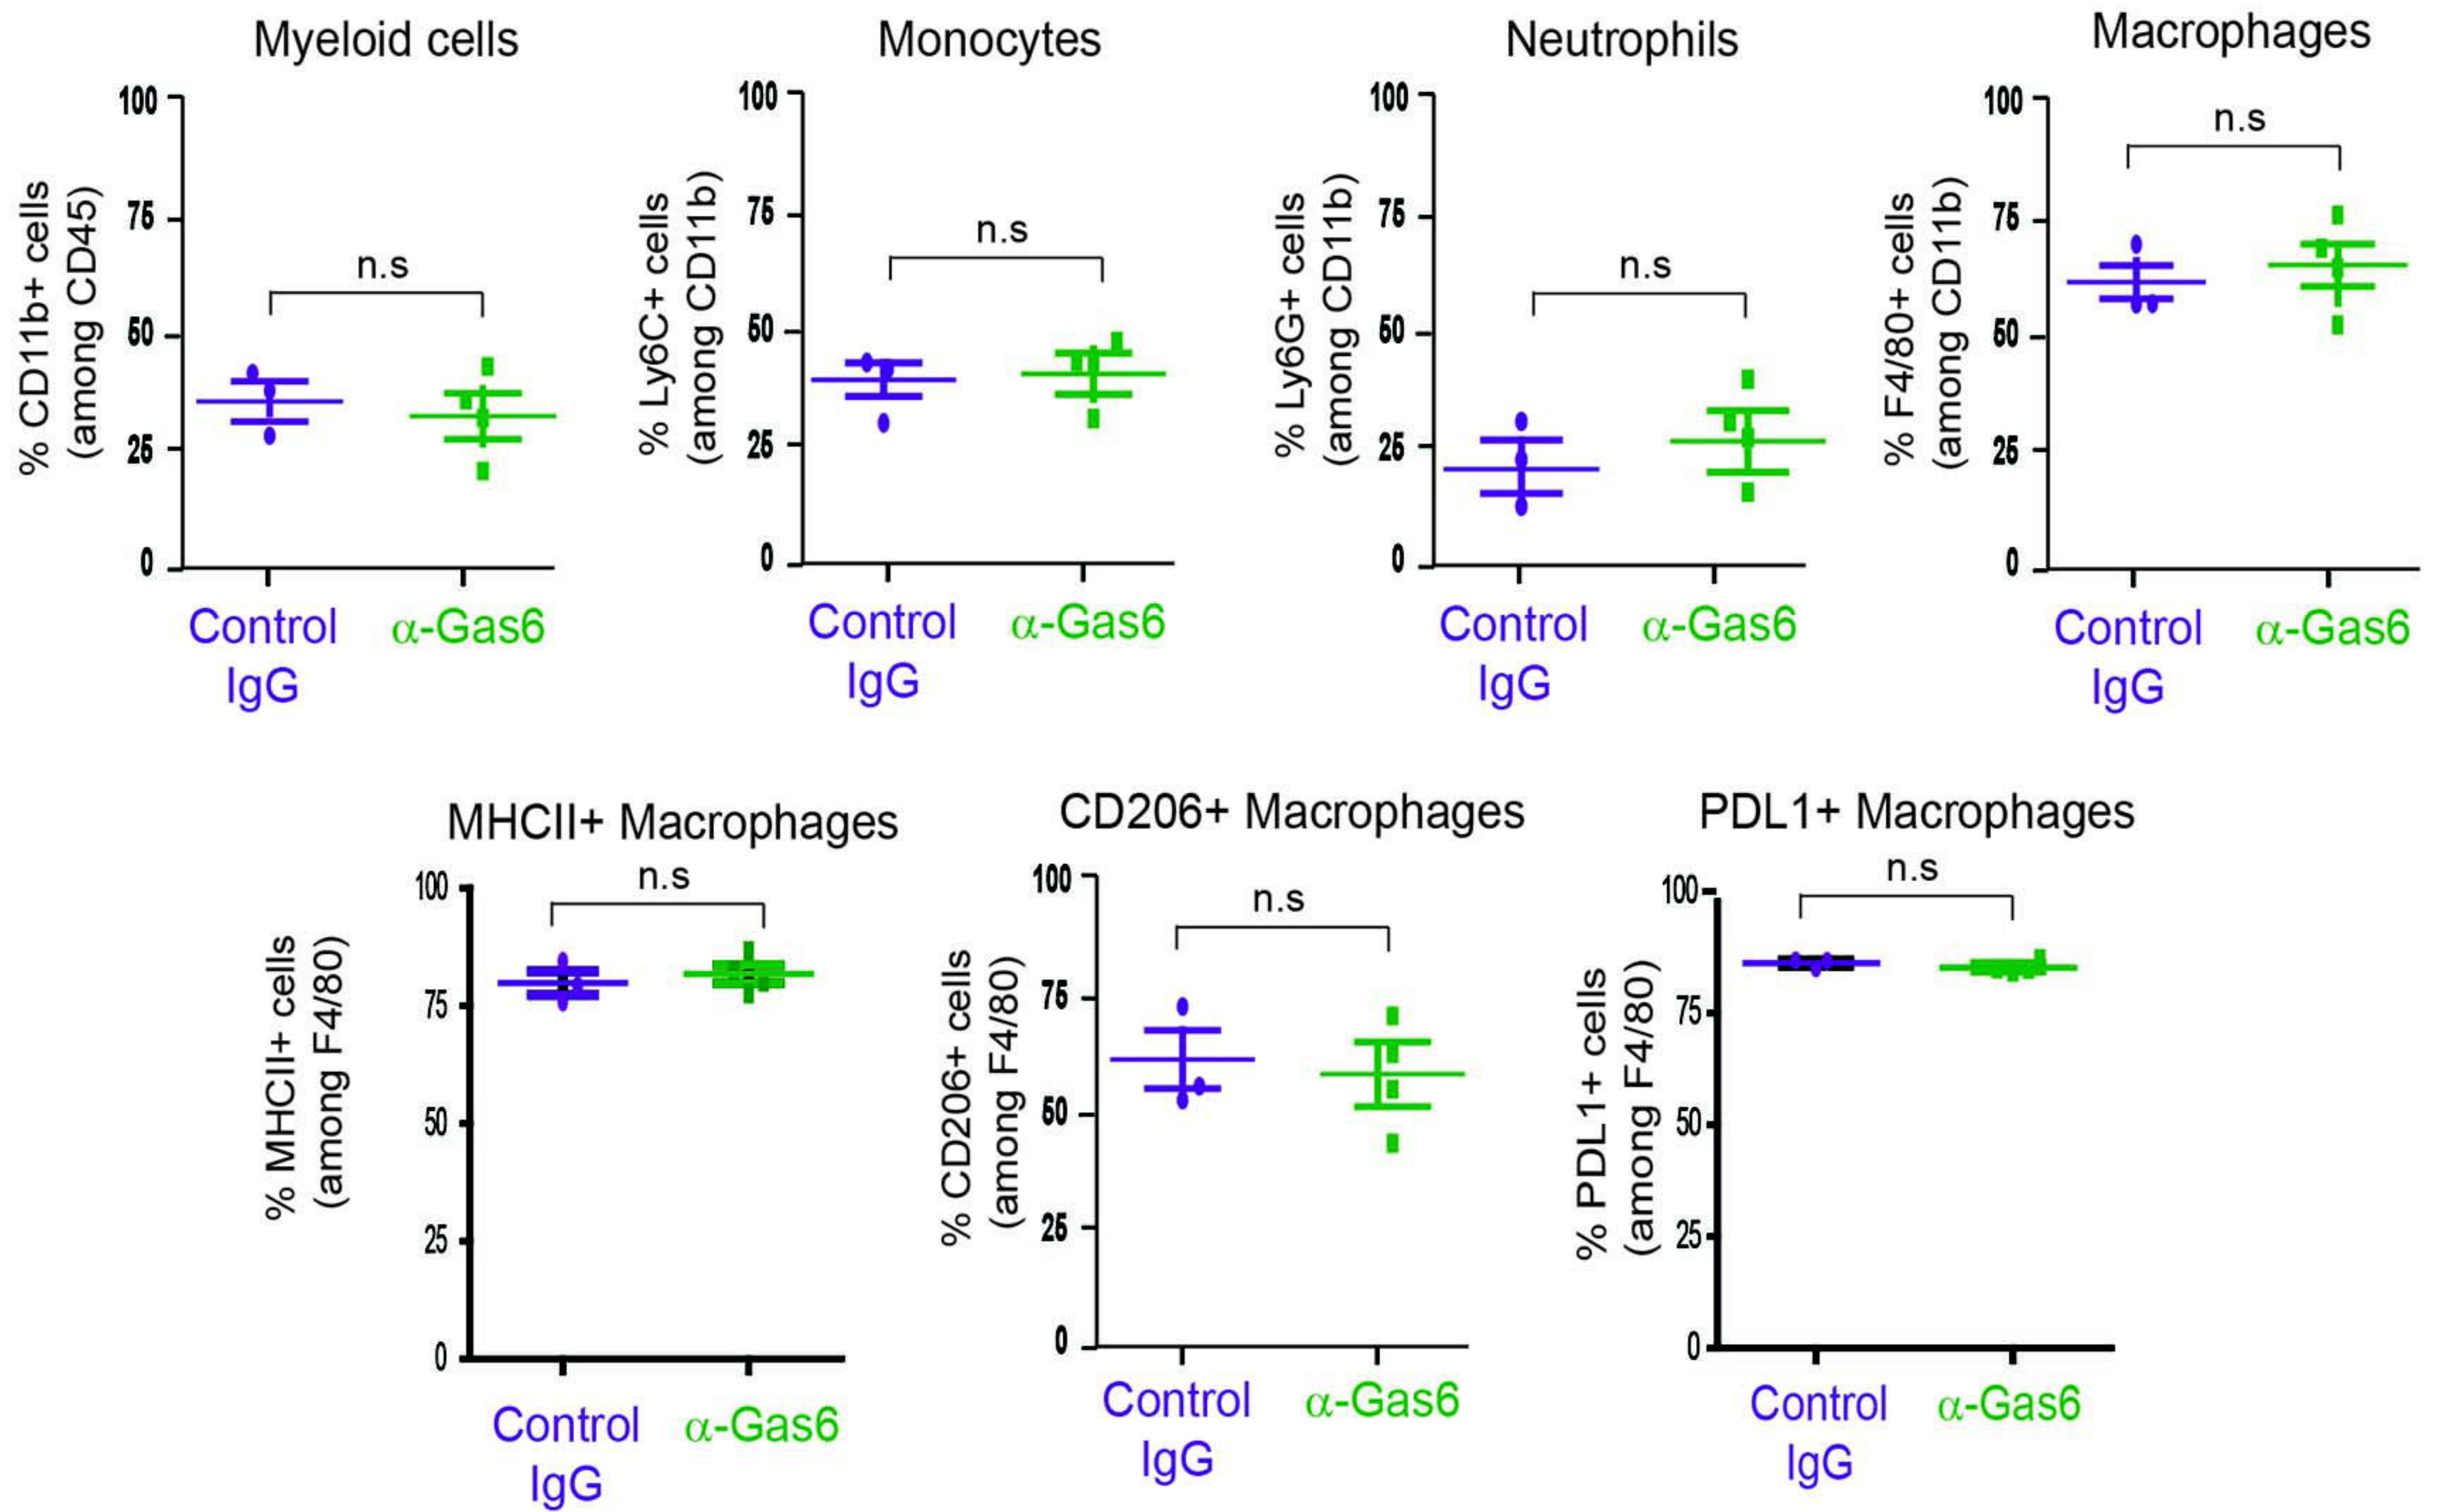

B

## T cells

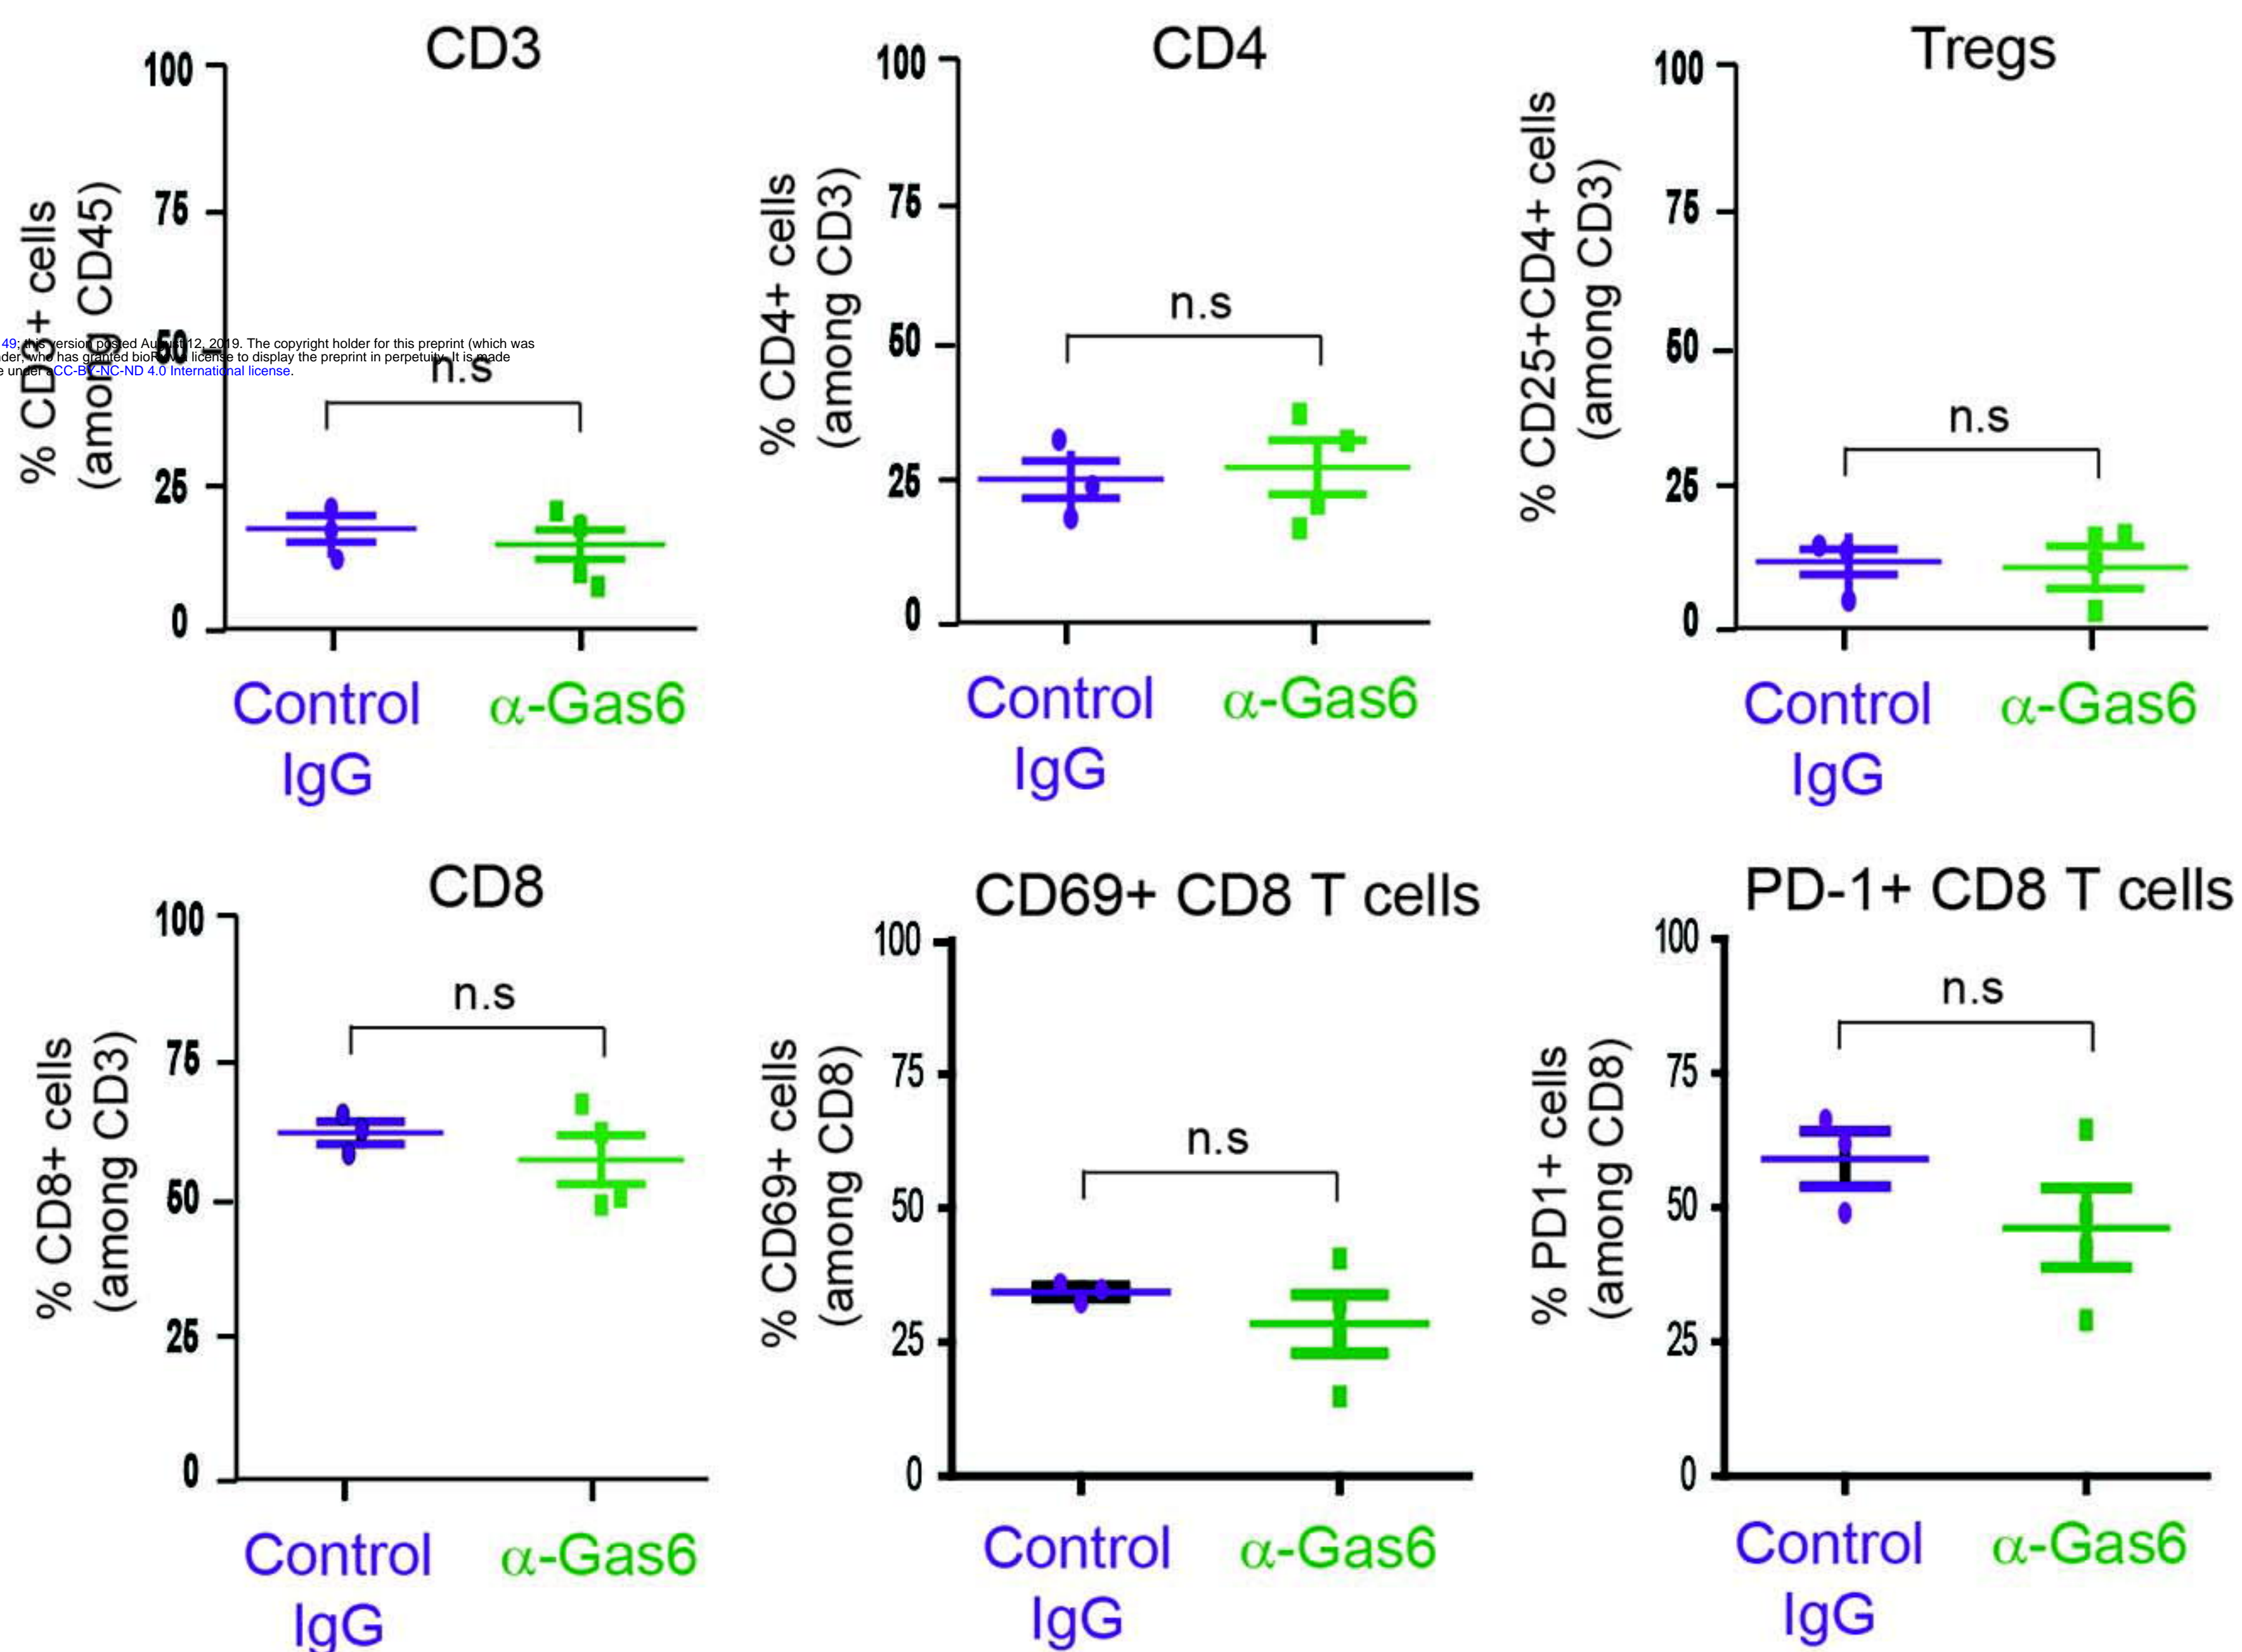

**A***NKp46*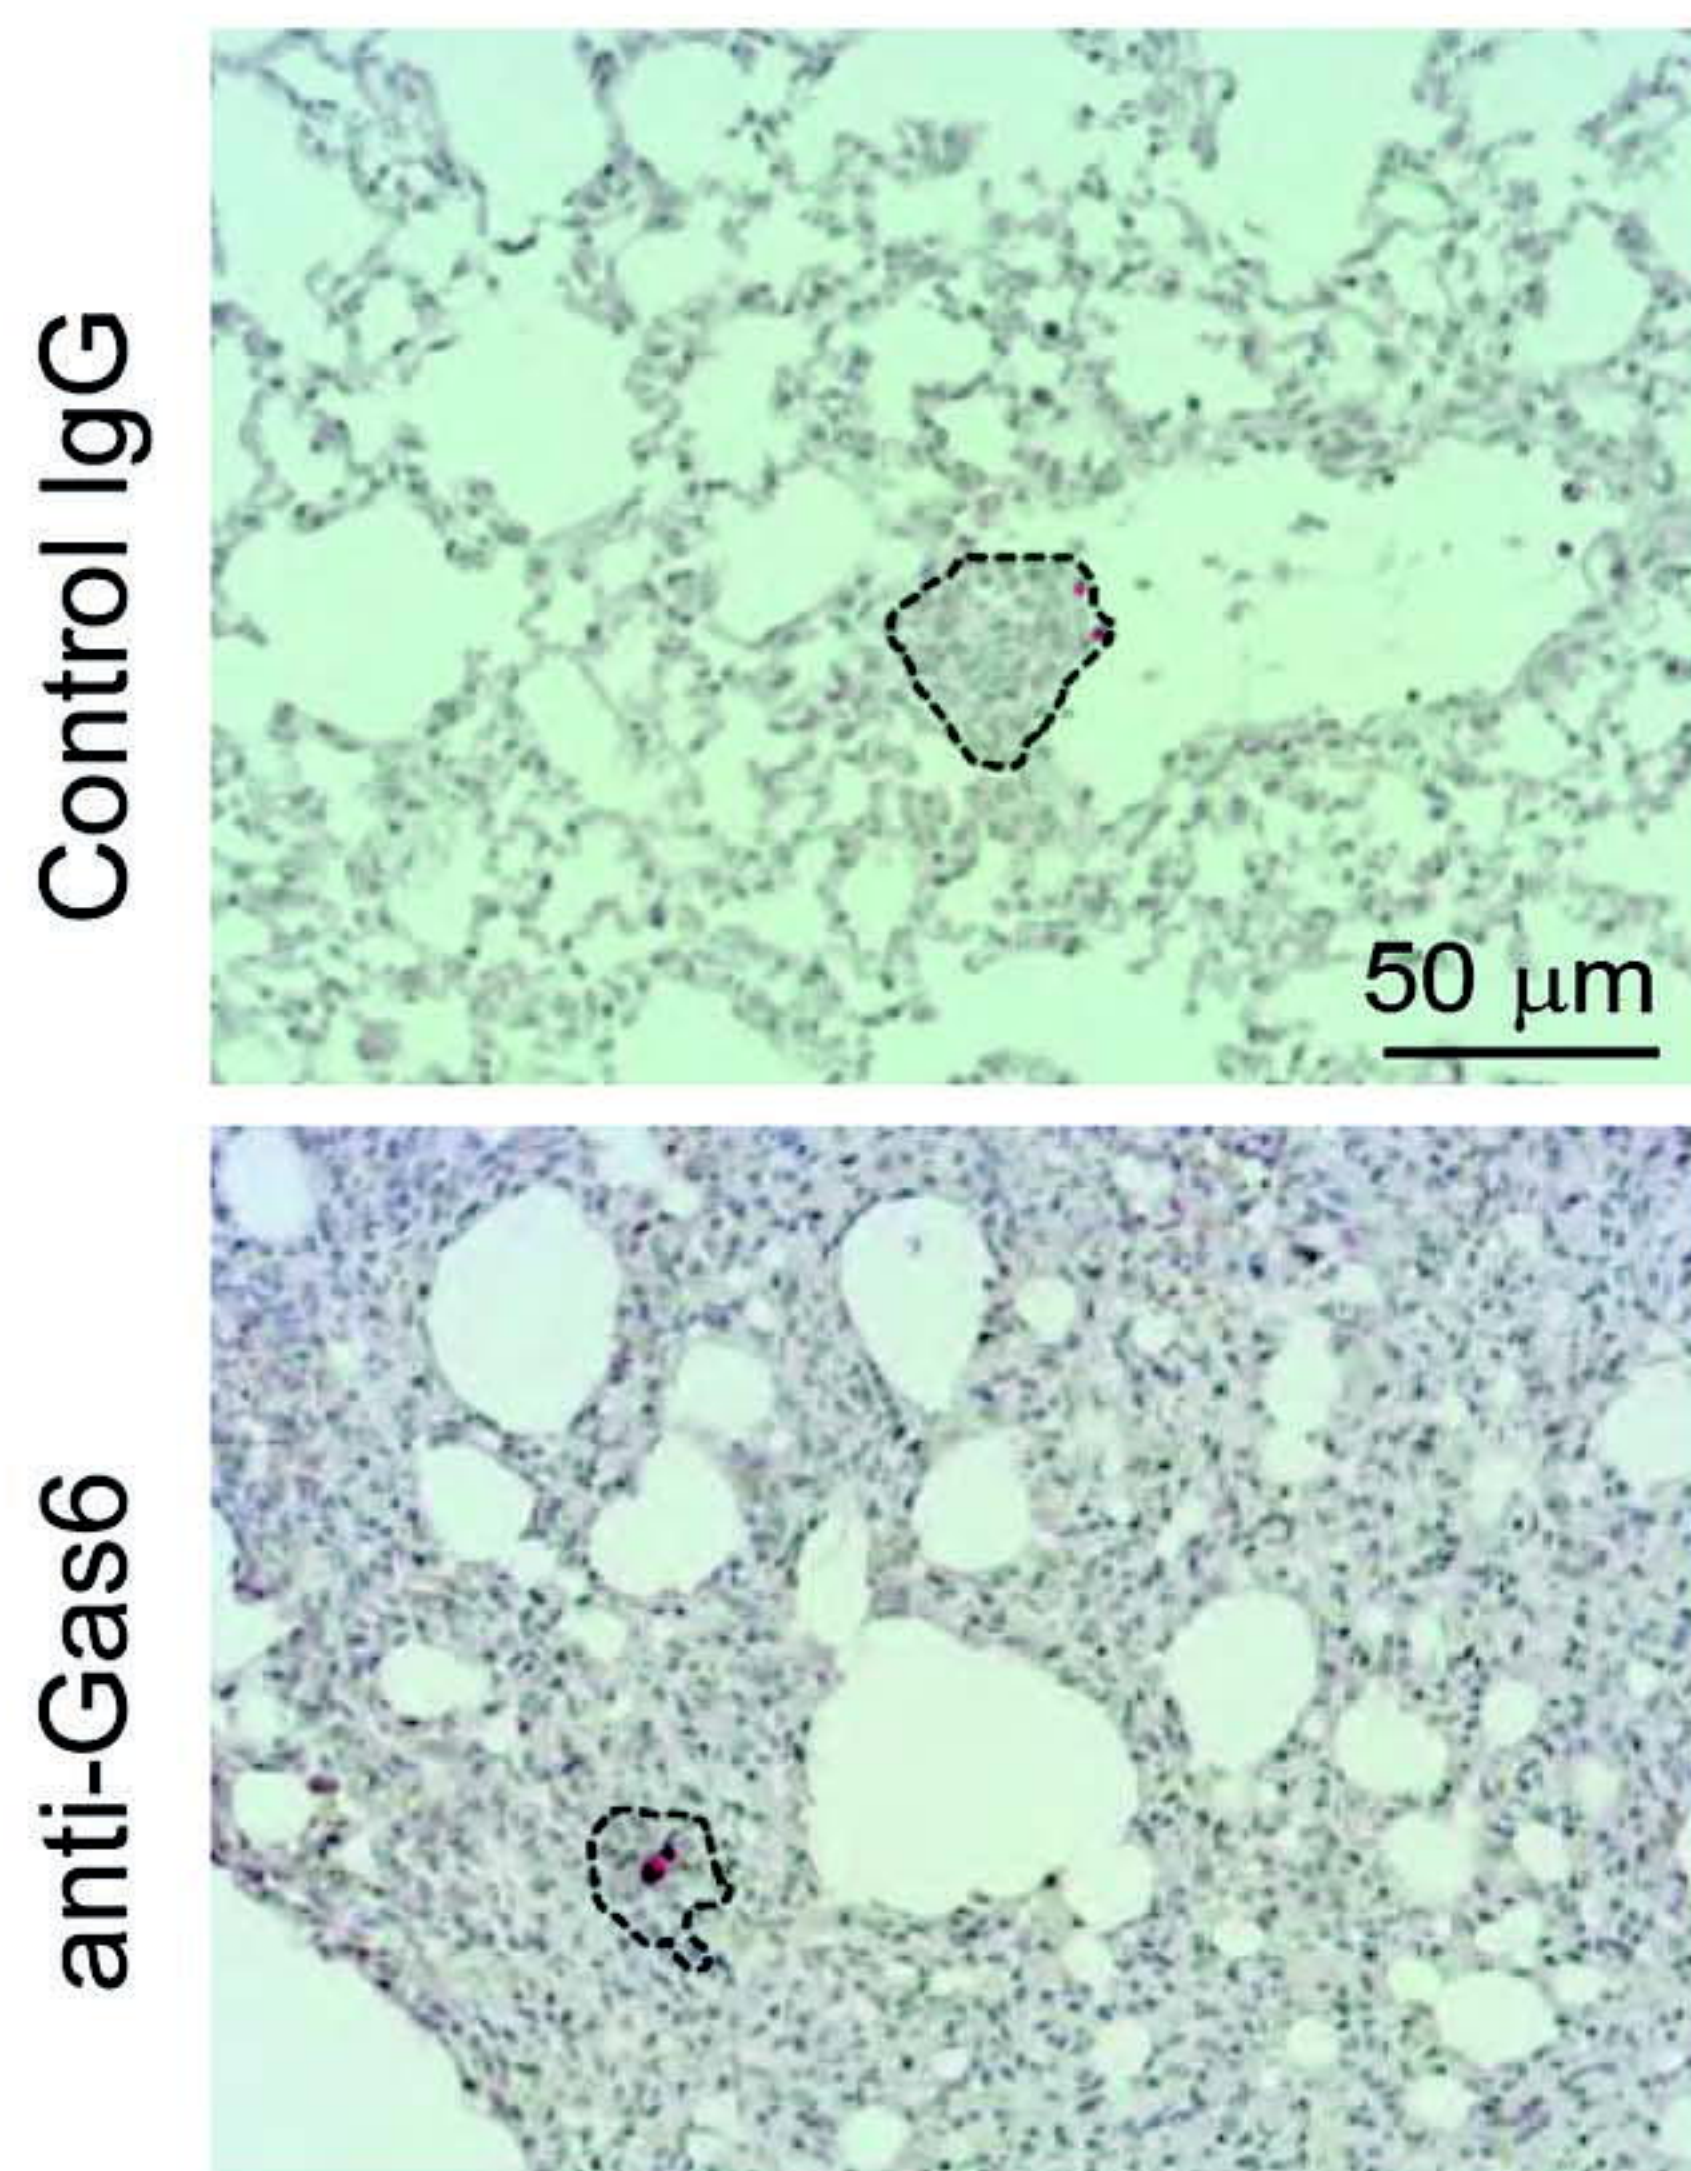**B**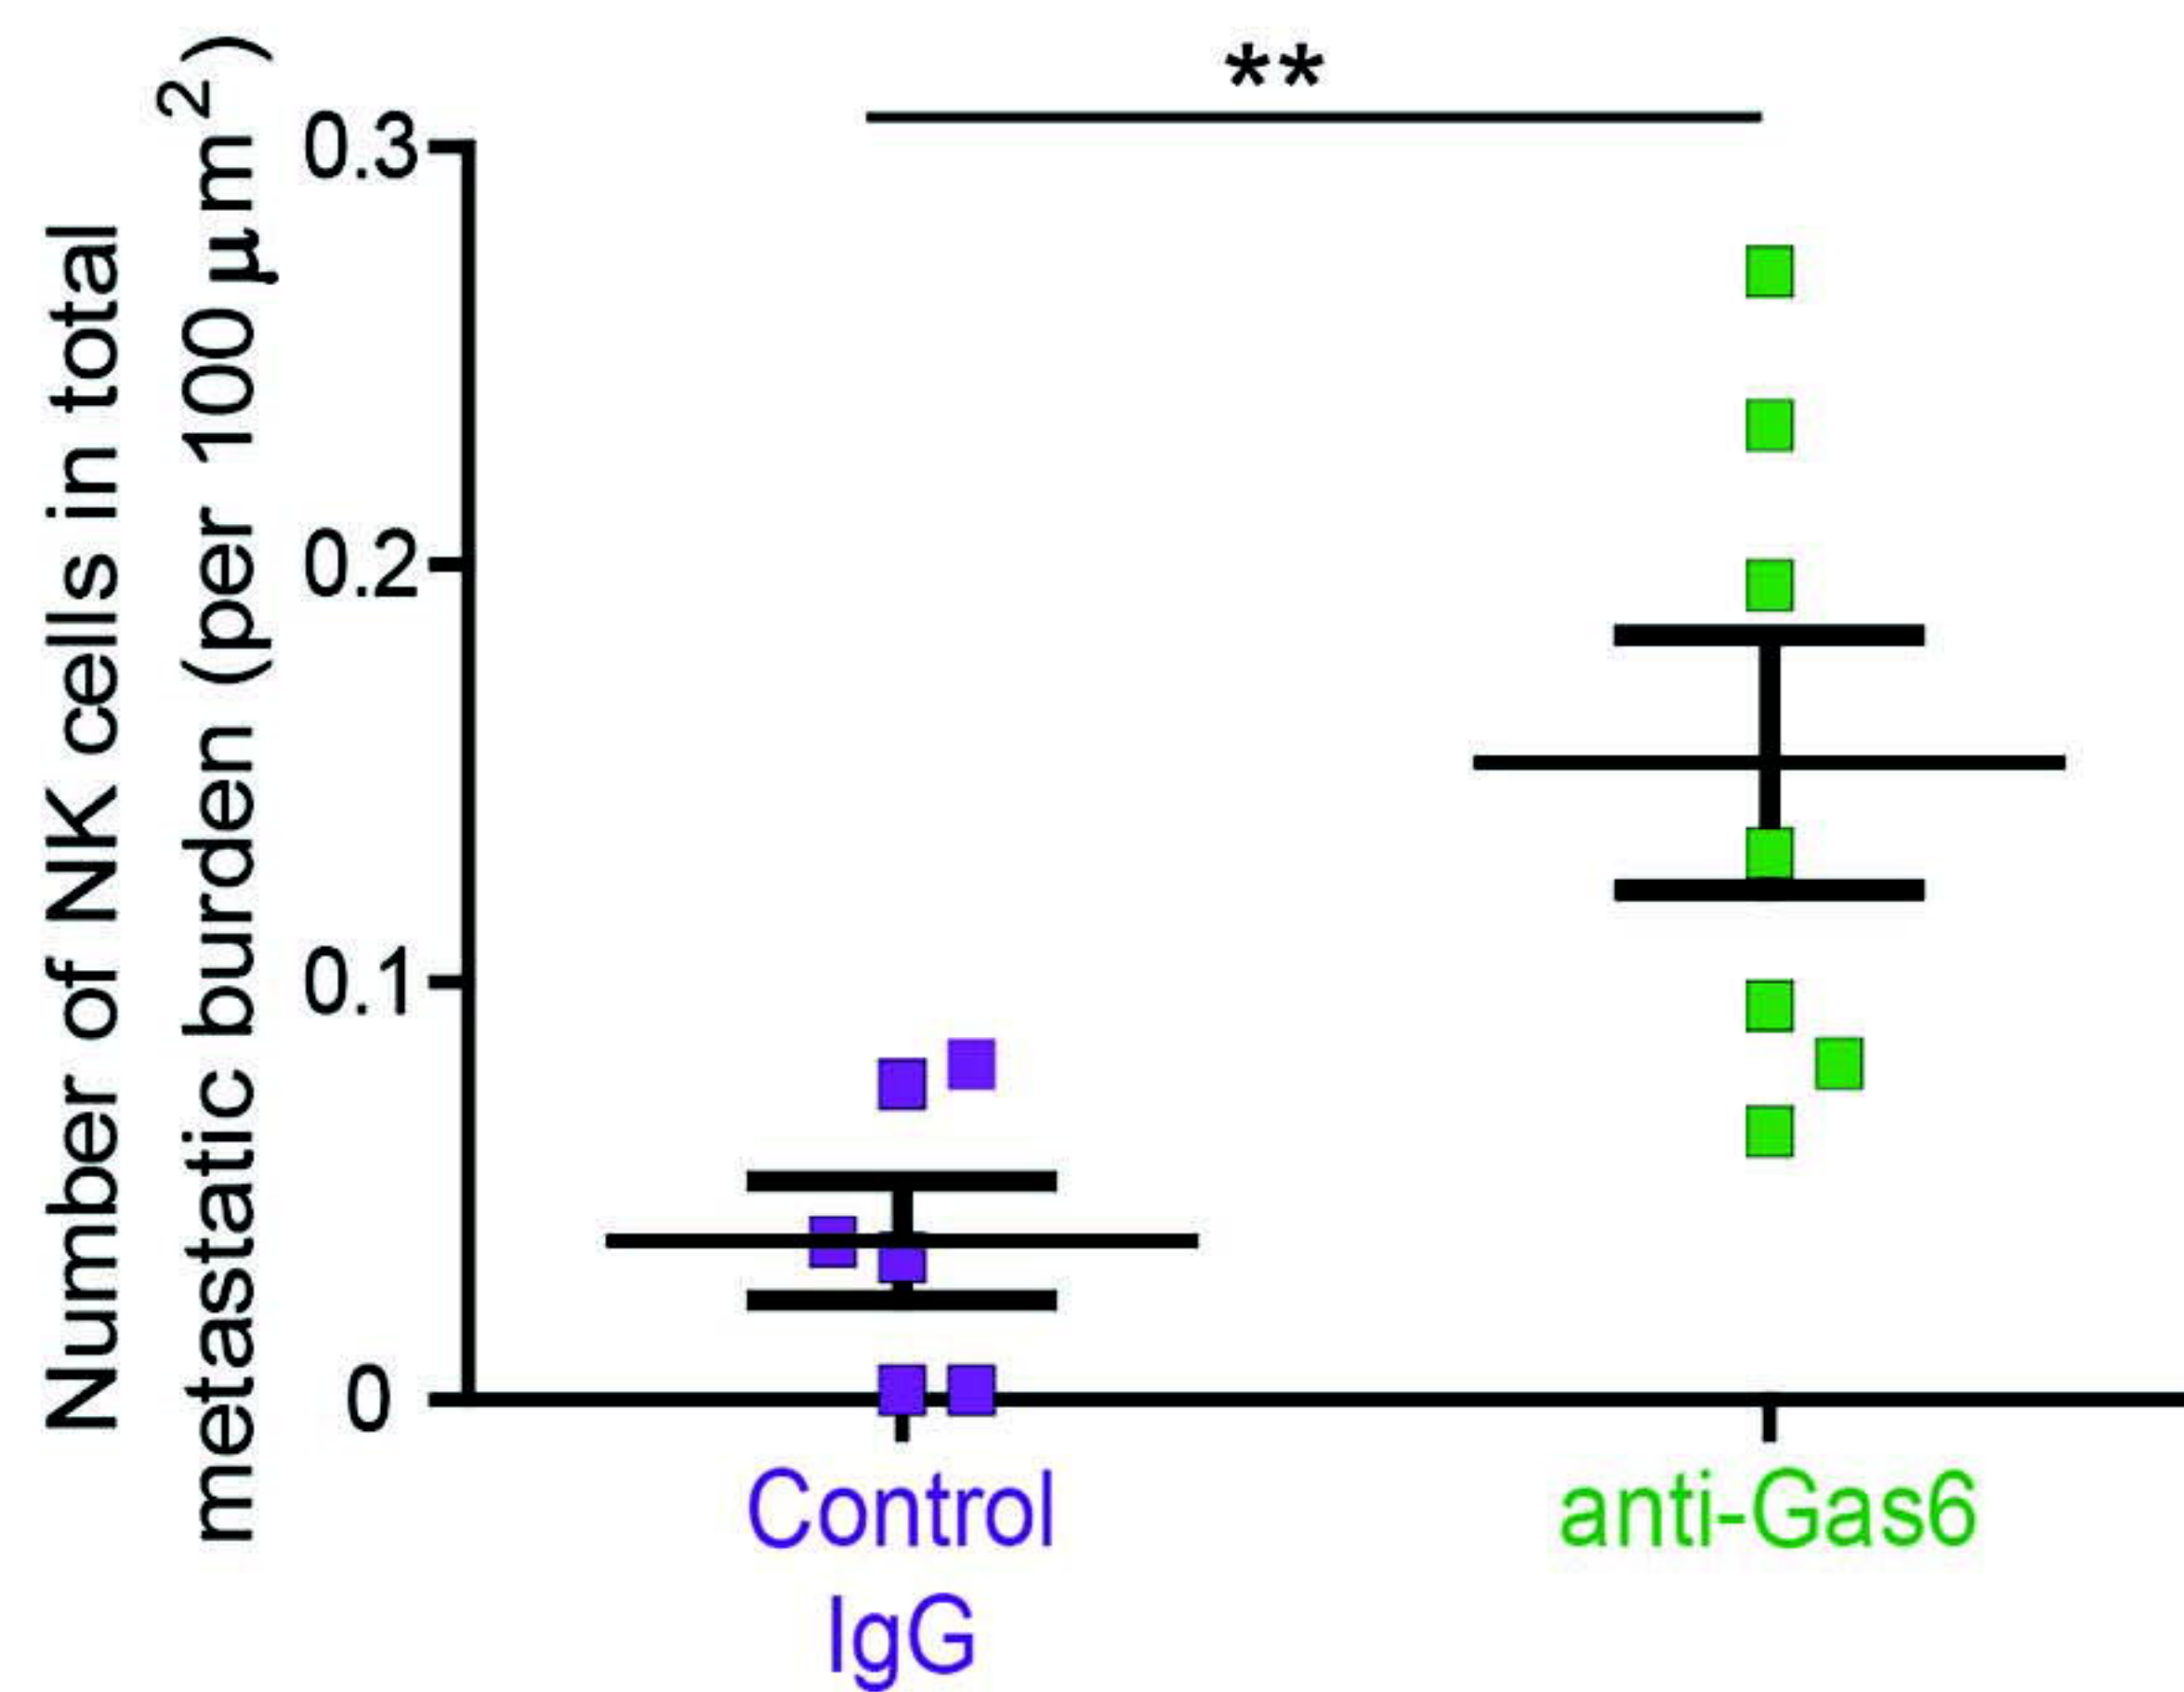**C***NKp46/Ki67/nuclei*

bioRxiv preprint doi: <https://doi.org/10.1101/732149>; this version posted August 12, 2019. The copyright holder for this preprint (which was not certified by peer review) is the author/funder, who has granted bioRxiv a license to display the preprint in perpetuity. It is made available under aCC-BY 4.0 International license.

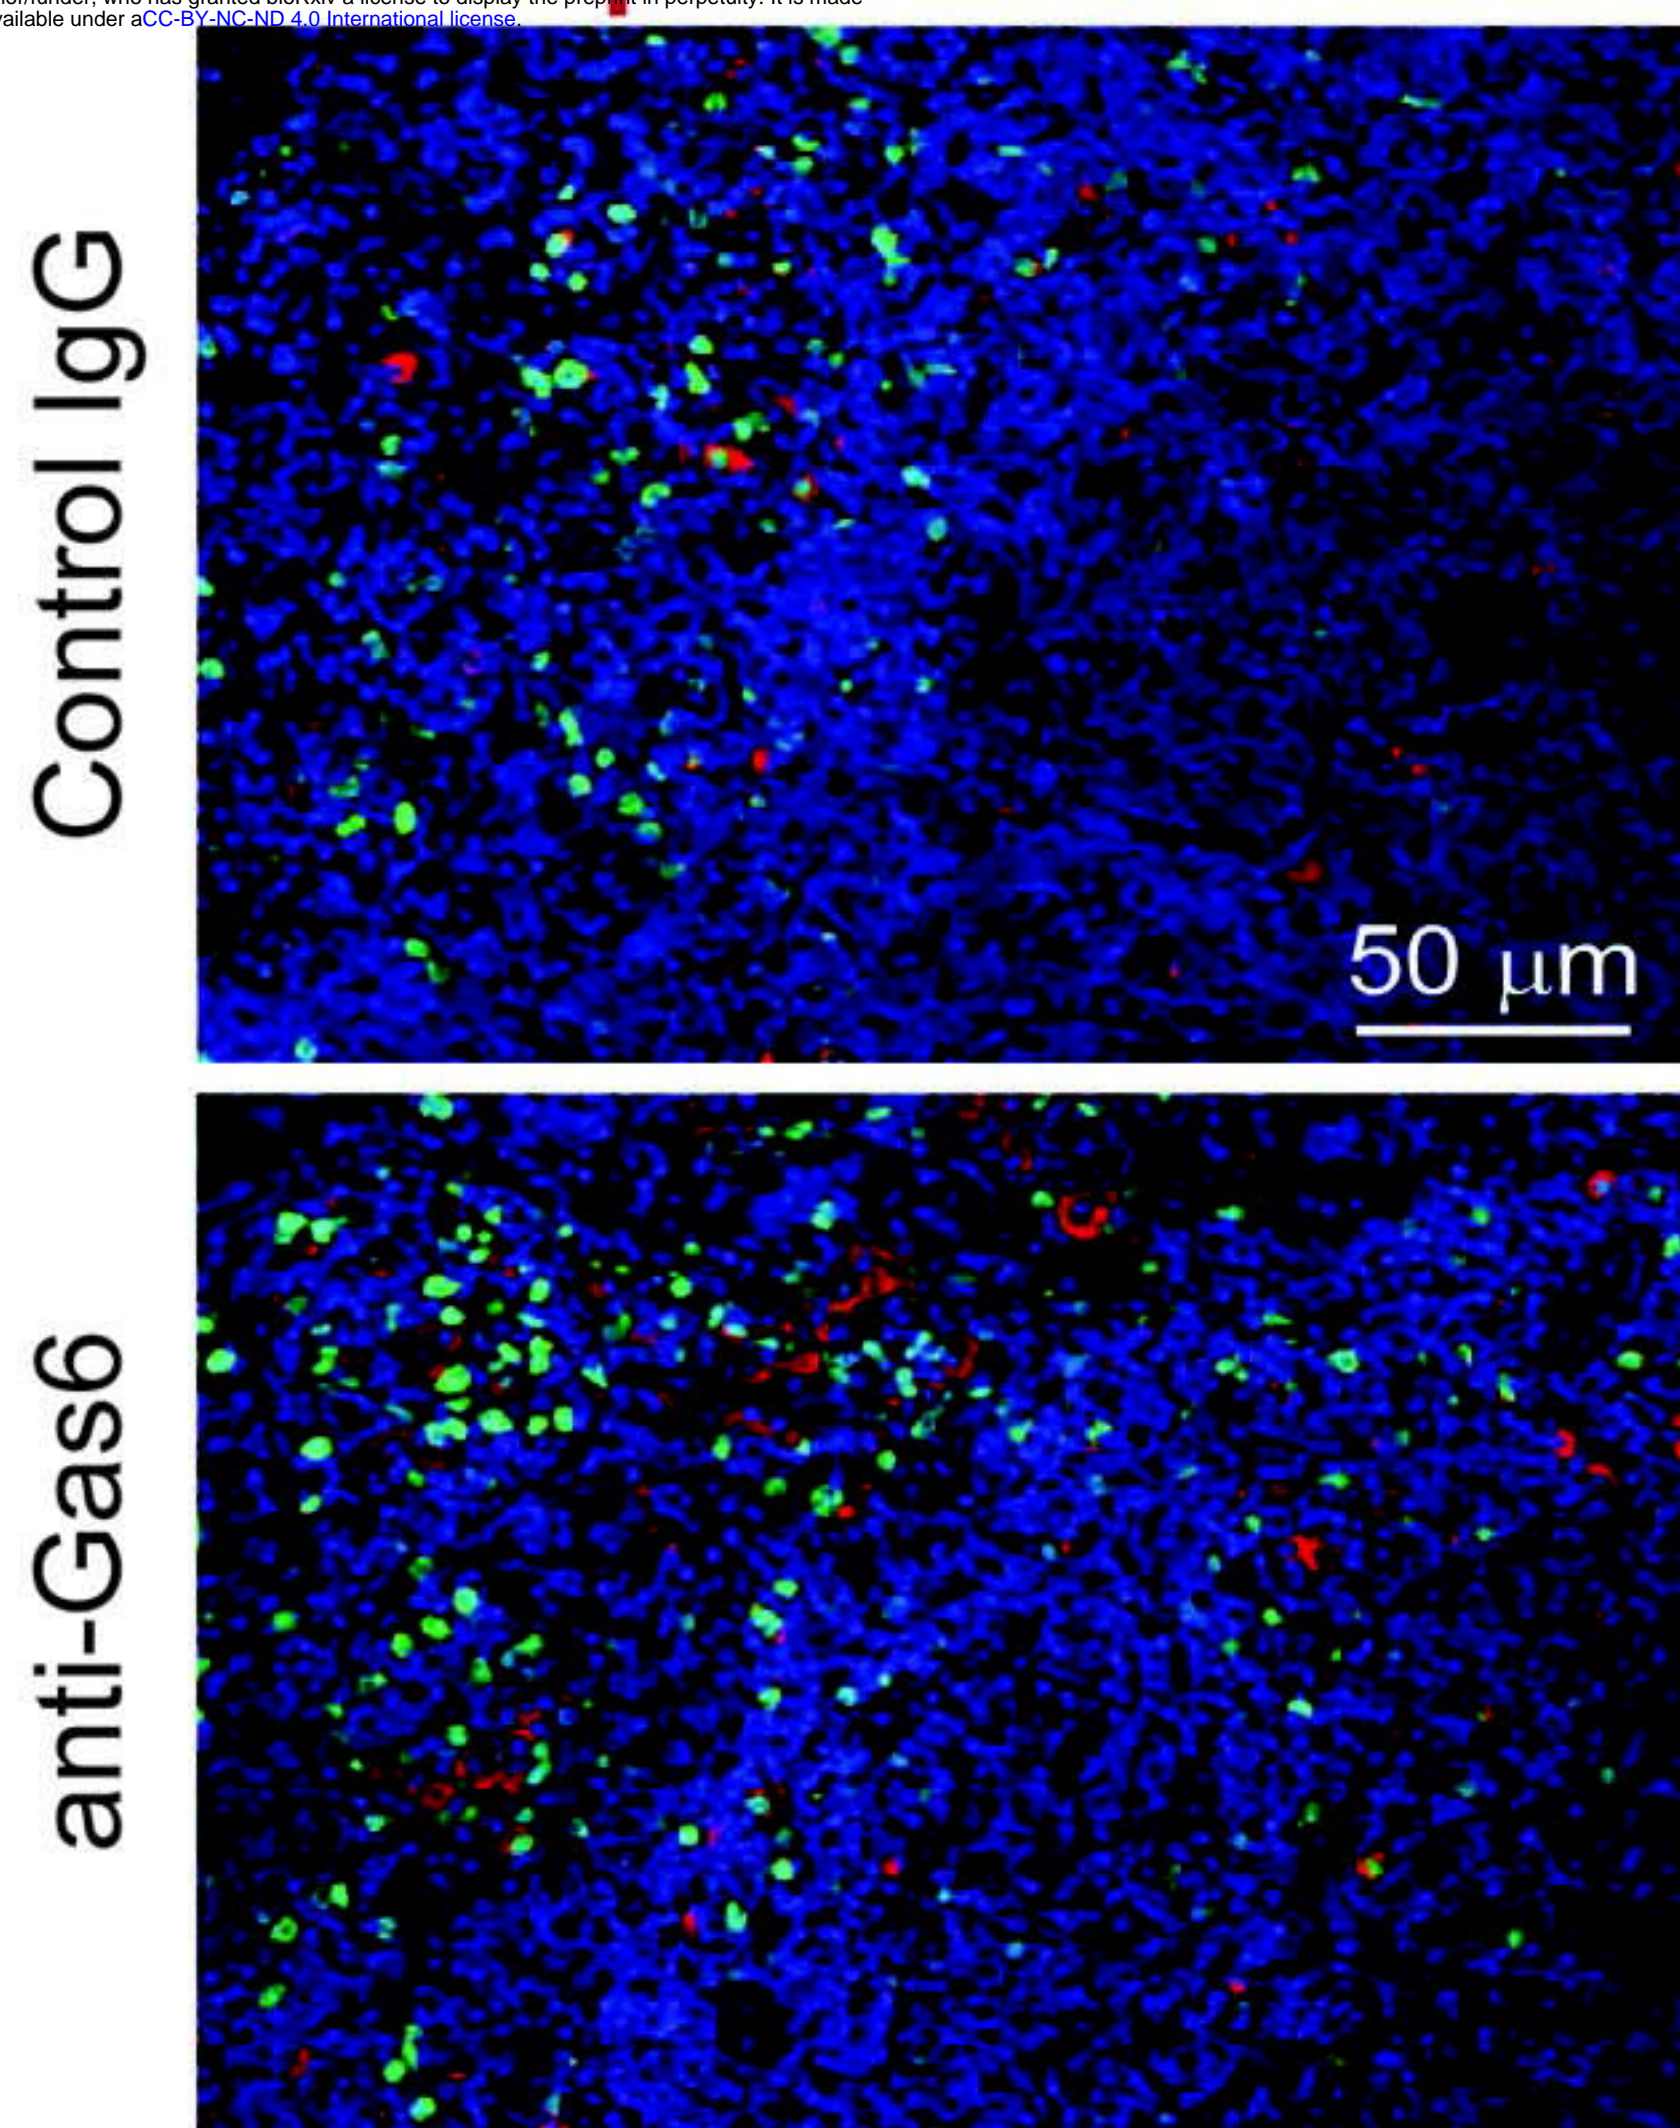**D**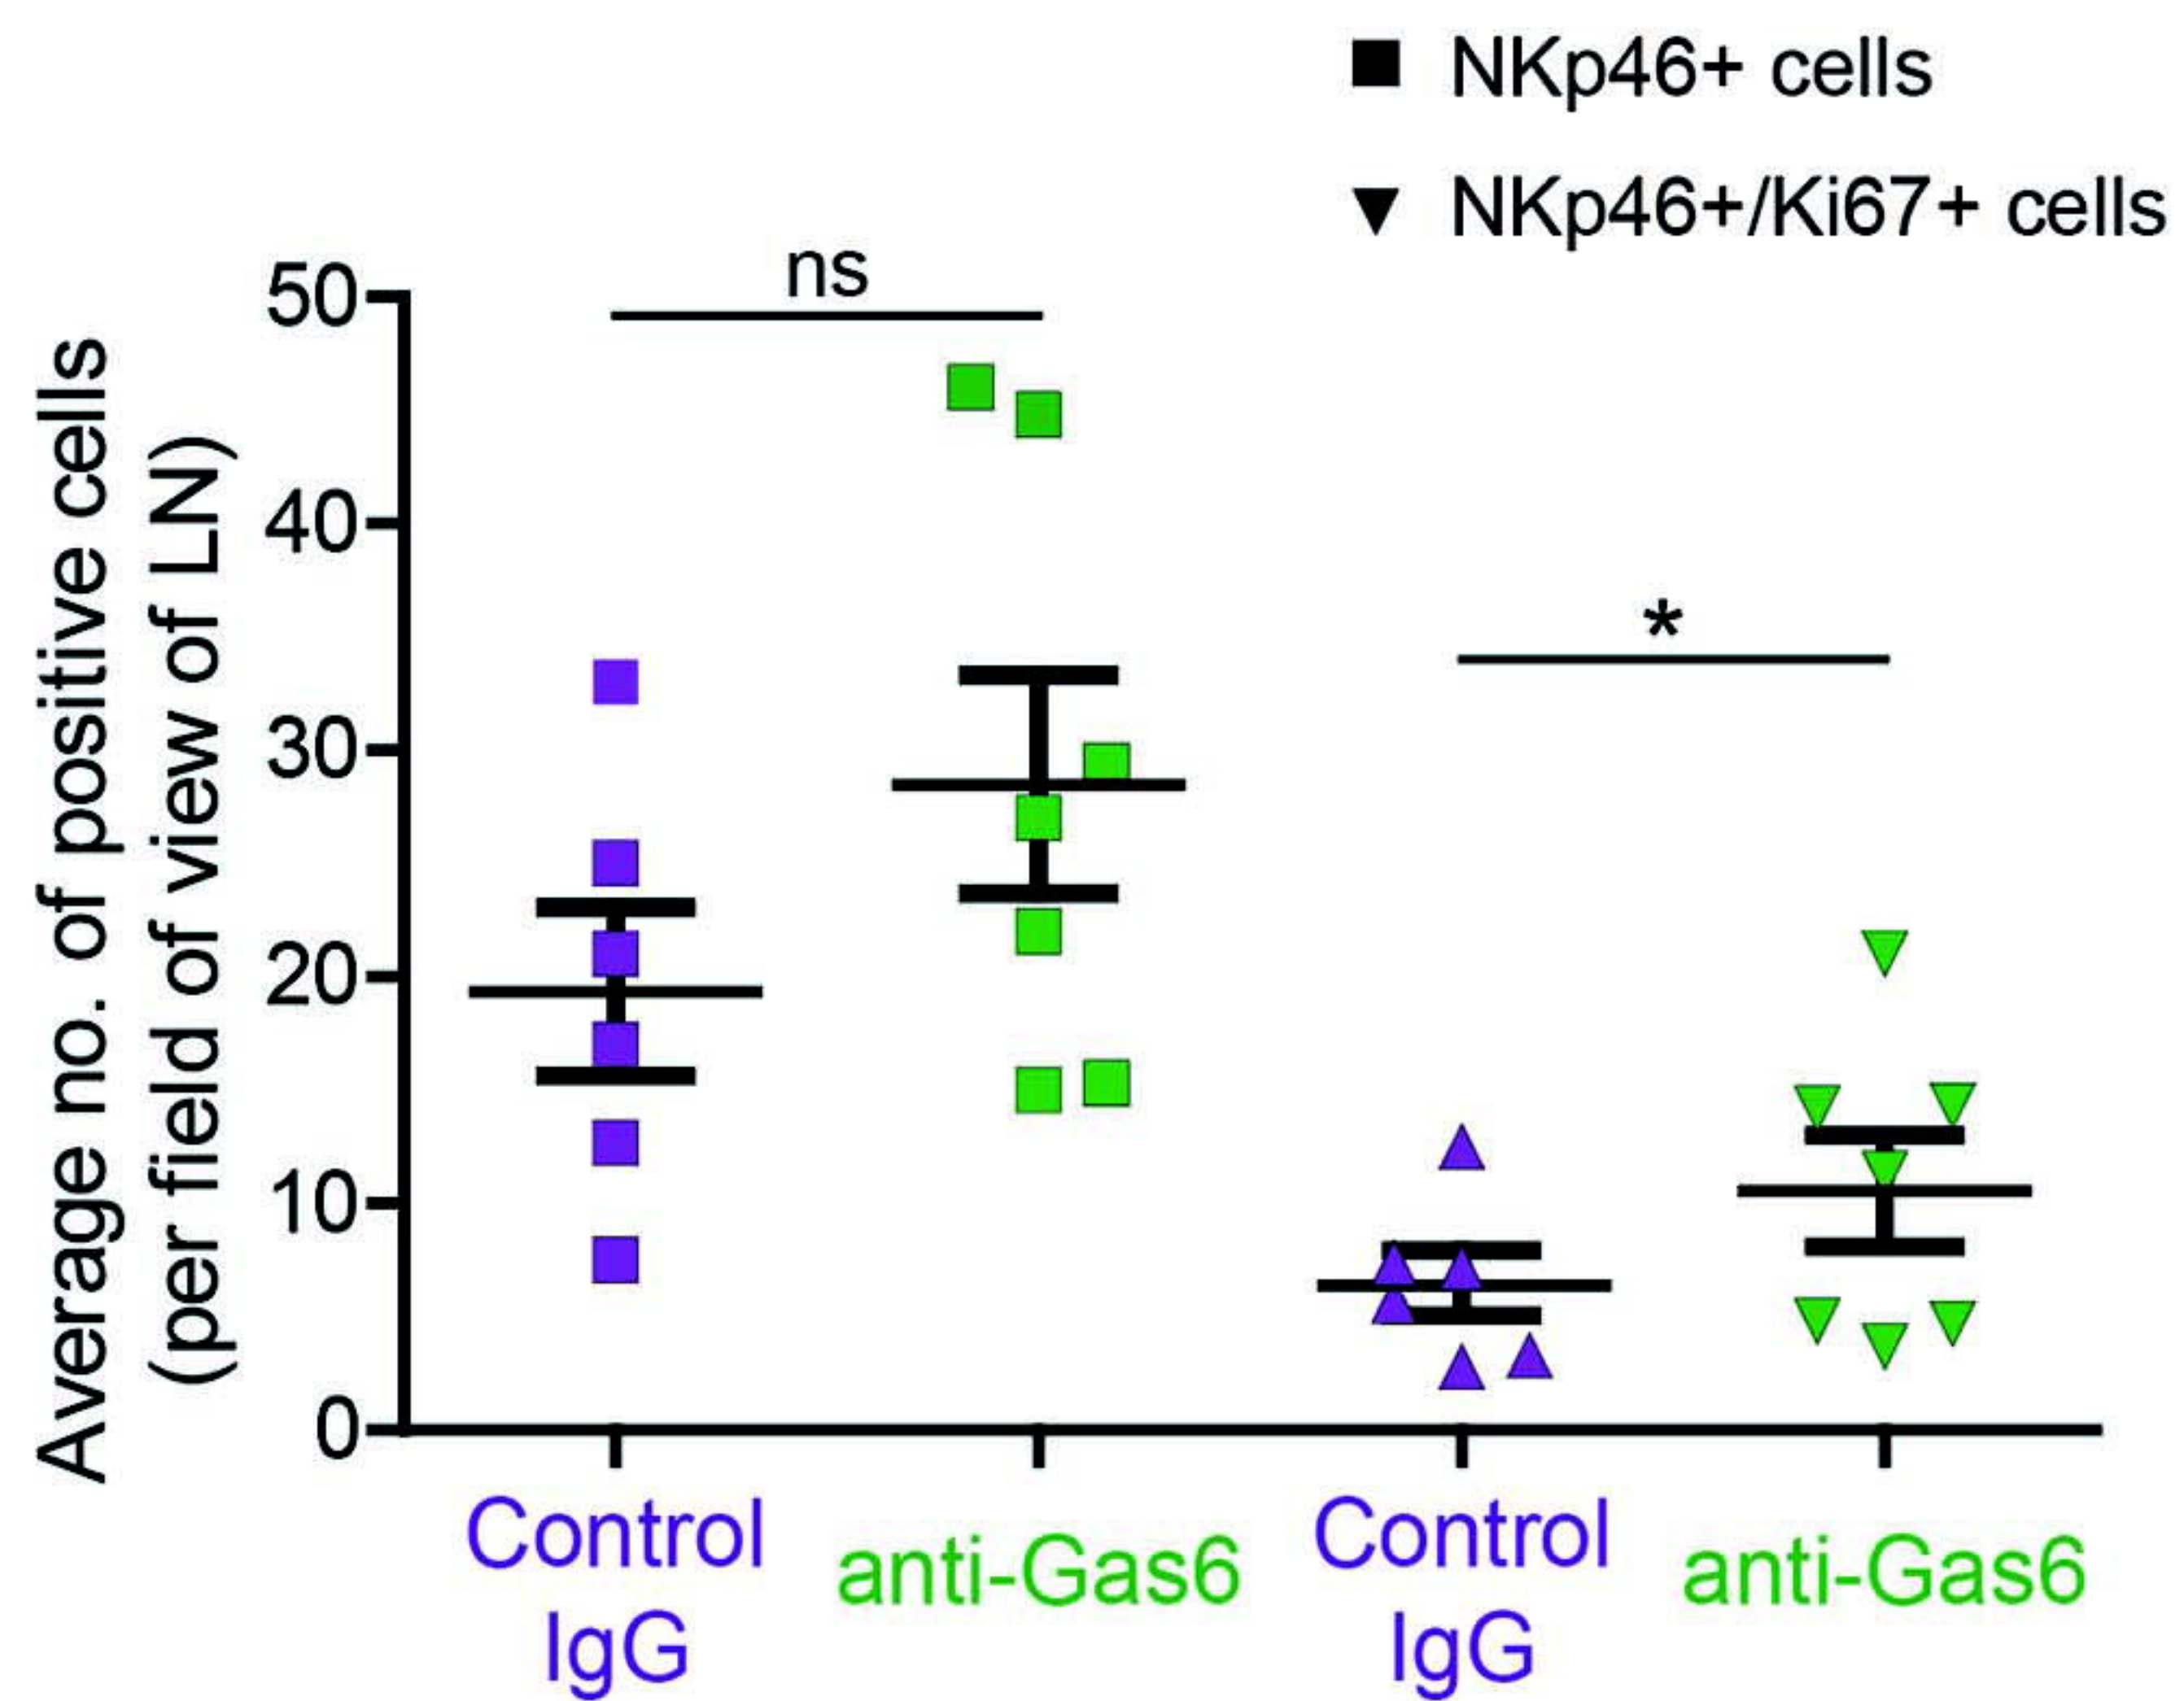

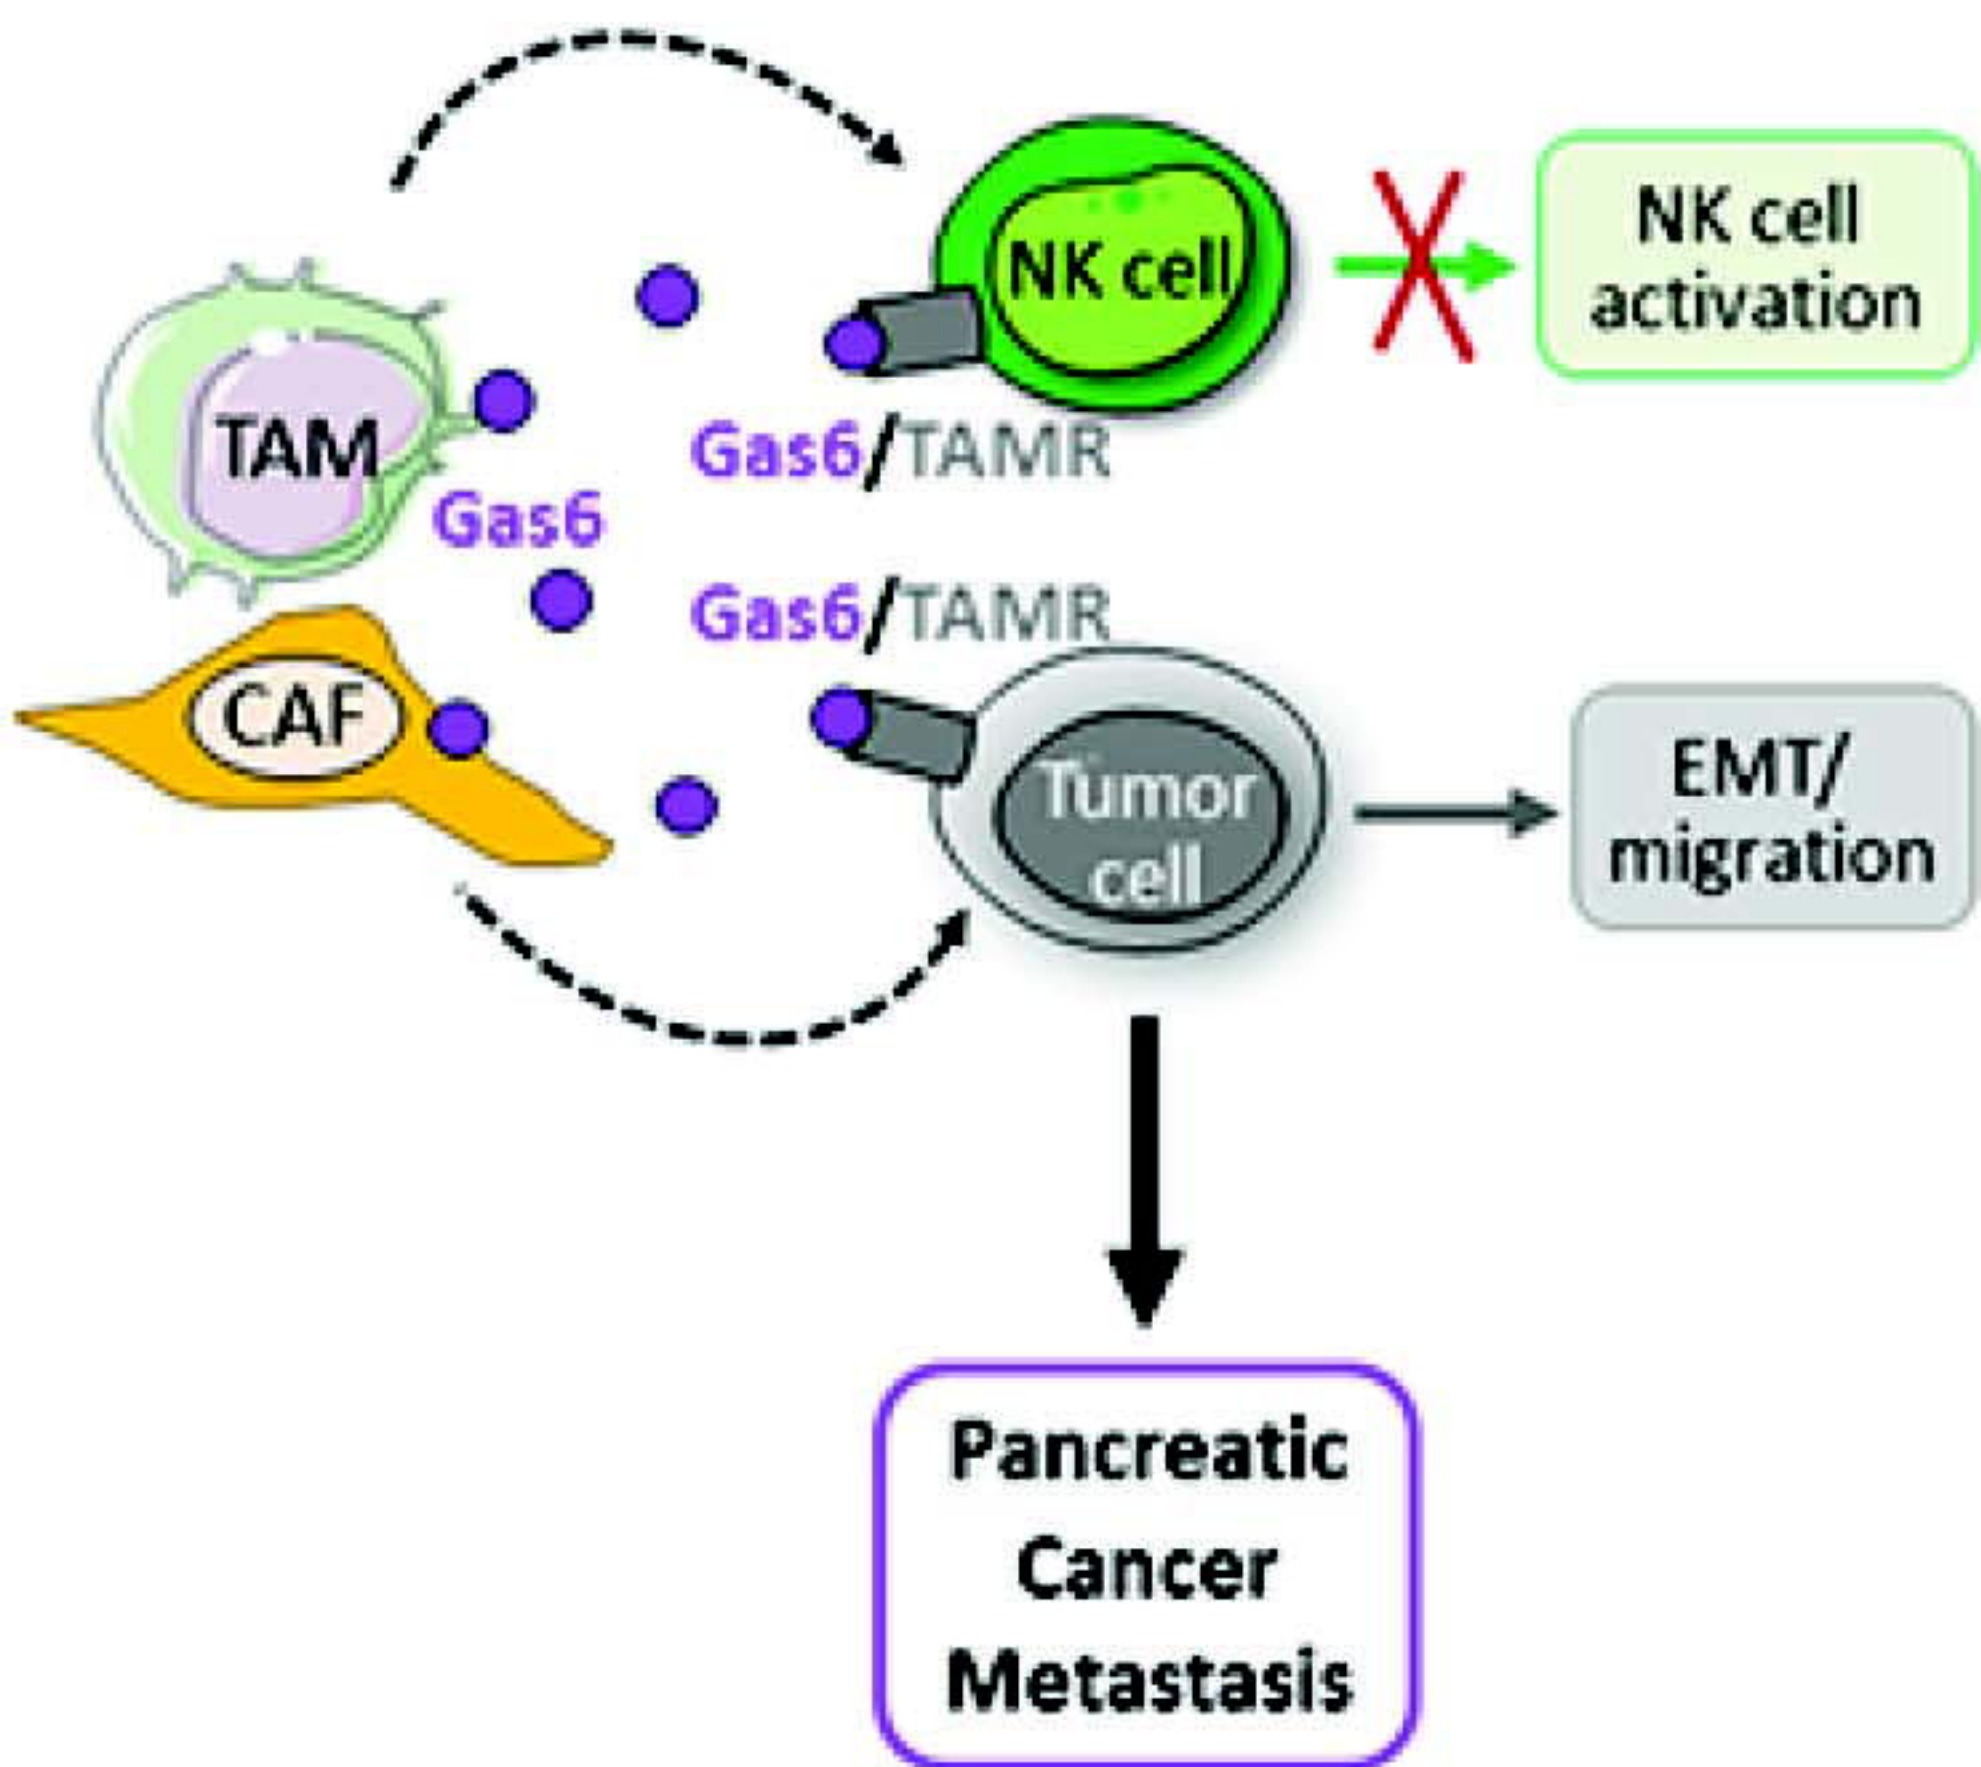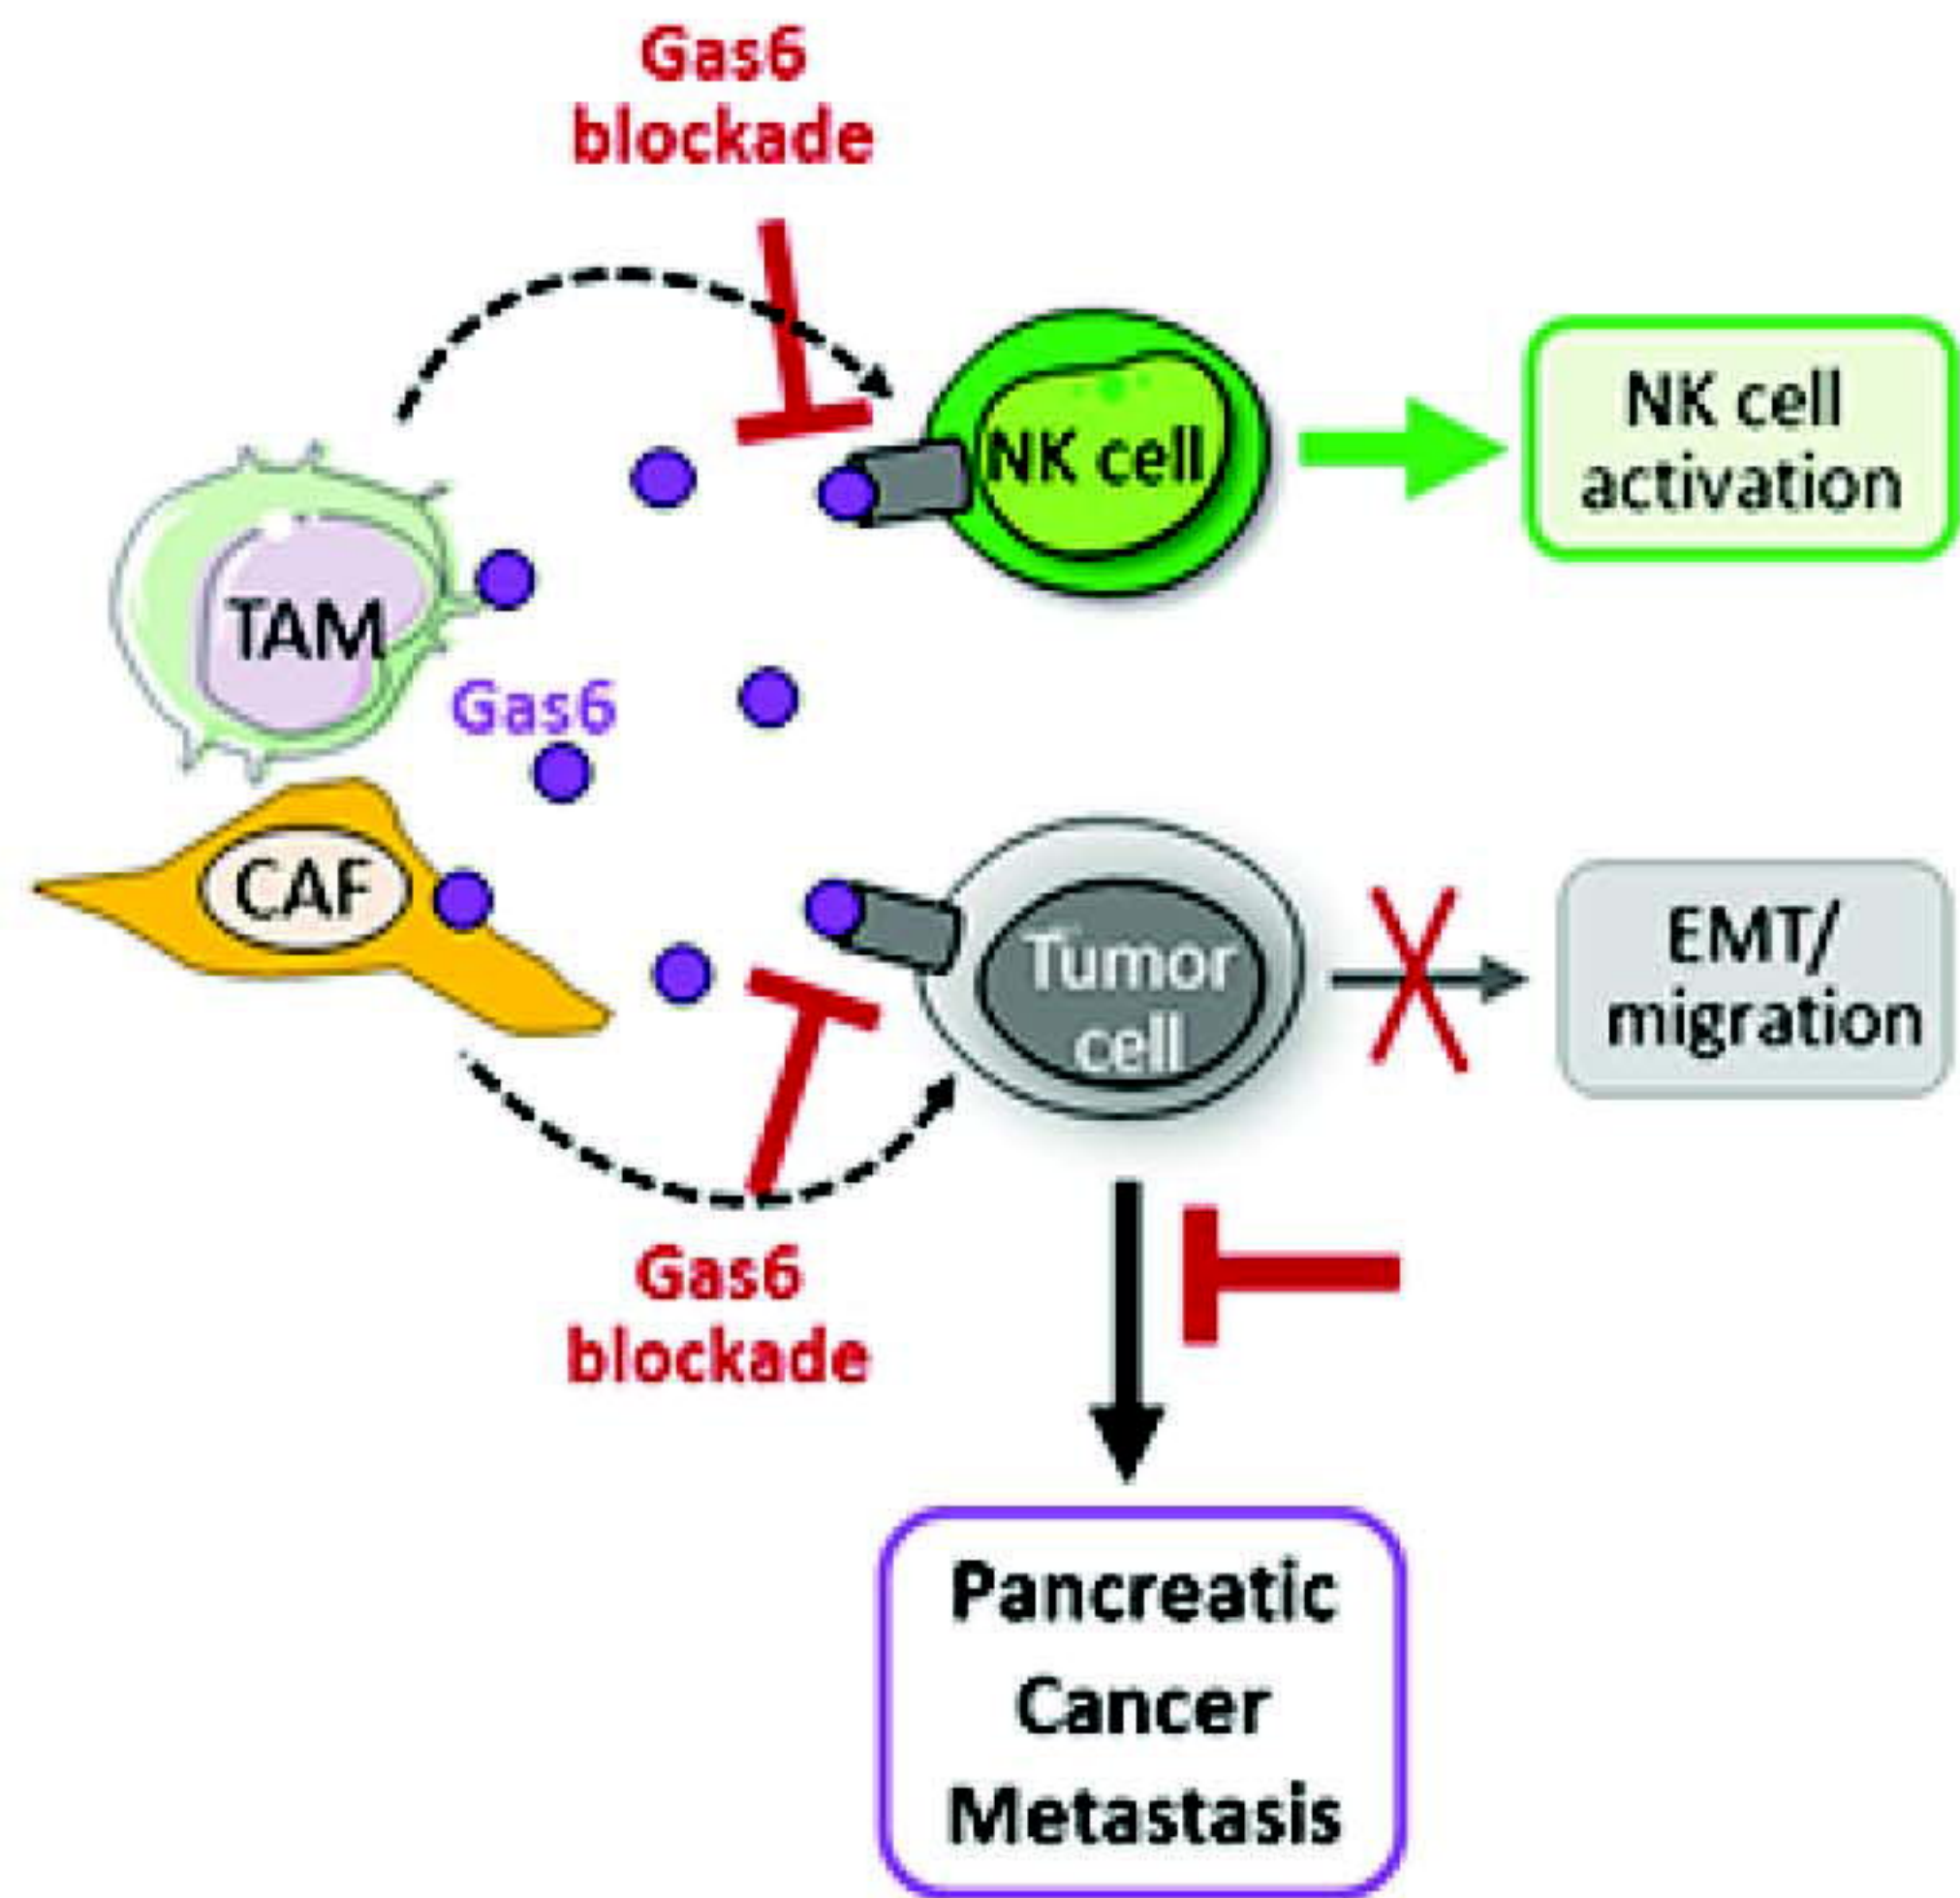

Source: https://biorxiv.org/content/biorxiv/early/2019/08/12/732149.full-text.pdf
